# Supplementary material
Source: PubMed Central journal article supplement (PMC5415638)
Supplement: onc2016382x4.pdf [file onc2016382x4.pdf]

| Motif Name                                                   | Consensus            | P-value   | Log P-value | q-value<br>(Benjamini) | # of Target<br>Sequences<br>with Motif(of<br>11002) | % of Target<br>Sequences<br>with Motif | # of Background<br>Sequences with<br>Motif(of 38320) | % of<br>Background<br>Sequences<br>with Motif |
|--------------------------------------------------------------|----------------------|-----------|-------------|------------------------|-----------------------------------------------------|----------------------------------------|------------------------------------------------------|-----------------------------------------------|
| ERE(NR),IR3/MCF7-ERA-ChIP-Seq(Unpublished)/Homer             | VAGGTCACNSTGACC      | 1e-813    | -1.87E+03   | 0                      | 864                                                 | 34.56%                                 | 847                                                  | 1.85%                                         |
| FOXA1(Forkhead)/LNCAP-FOXA1-ChIP-Seq(GSE27824)/Homer         | WAAGTAAACA           | 1.00E-167 | -3.85E+02   | 0                      | 756                                                 | 30.24%                                 | 4681.6                                               | 10.21%                                        |
| FOXA1(Forkhead)/MCF7-FOXA1-ChIP-Seq(GSE26831)/Homer          | WAAGTAAACA           | 1.00E-153 | -3.54E+02   | 0                      | 653                                                 | 26.12%                                 | 3803.2                                               | 8.29%                                         |
| Foxa2(Forkhead)/Liver-Foxa2-ChIP-Seq(GSE25694)/Homer         | CYTGTTTACWYW         | 1.00E-146 | -3.36E+02   | 0                      | 545                                                 | 21.80%                                 | 2824.9                                               | 6.16%                                         |
| Fox:Ebox(Forkhead,bHLH)/Panc1-Foxa2-ChIP-Seq(GSE47459)/Homer | NNNVCTGWGYAAACASN    | 1.00E-137 | -3.18E+02   | 0                      | 569                                                 | 22.76%                                 | 3199.1                                               | 6.98%                                         |
| Esrrb(NR)/mES-Esrrb-ChIP-Seq(GSE11431)/Homer                 | KTGACCTTGA           | 1.00E-110 | -2.54E+02   | 0                      | 443                                                 | 17.72%                                 | 2394.2                                               | 5.22%                                         |
| GRHL2(CP2)/HBE-GRHL2-ChIP-Seq(GSE46194)/Homer                | AAACYKGTWWDACMRGTTTB | 1.00E-71  | -1.64E+02   | 0                      | 258                                                 | 10.32%                                 | 1253.6                                               | 2.73%                                         |
| Fosl2(bZIP)/3T3L1-Fosl2-ChIP-Seq(GSE56872)/Homer             | NATGASTCABNN         | 1.00E-66  | -1.53E+02   | 0                      | 221                                                 | 8.84%                                  | 993.7                                                | 2.17%                                         |
| Jun-AP1(bZIP)/K562-cJun-ChIP-Seq(GSE31477)/Homer             | GATGASTCATCN         | 1.00E-56  | -1.31E+02   | 0                      | 171                                                 | 6.84%                                  | 697.4                                                | 1.52%                                         |
| Fra1(bZIP)/BT549-Fra1-ChIP-Seq(GSE46166)/Homer               | NNATGASTCATH         | 1.00E-54  | -1.25E+02   | 0                      | 288                                                 | 11.52%                                 | 1855.1                                               | 4.04%                                         |
| Erra(NR)/HepG2-Erra-ChIP-Seq(GSE31477)/Homer                 | CAAAGGTCAG           | 1.00E-52  | -1.21E+02   | 0                      | 779                                                 | 31.16%                                 | 8439.4                                               | 18.40%                                        |
| BATF(bZIP)/Th17-BATF-ChIP-Seq(GSE39756)/Homer                | DATGASTCAT           | 1.00E-51  | -1.19E+02   | 0                      | 323                                                 | 12.92%                                 | 2310.2                                               | 5.04%                                         |
| Atf3(bZIP)/GBM-ATF3-ChIP-Seq(GSE33912)/Homer                 | DATGASTCATHN         | 1.00E-50  | -1.15E+02   | 0                      | 318                                                 | 12.72%                                 | 2294.7                                               | 5.00%                                         |
| AP-1(bZIP)/ThioMac-PU.1-ChIP-Seq(GSE21512)/Homer             | VTGACTCATC           | 1.00E-49  | -1.13E+02   | 0                      | 350                                                 | 14.00%                                 | 2693.6                                               | 5.87%                                         |
| Reverb(NR),DR2/RAW-Reverba.biotin-ChIP-Seq(GSE45914)/Homer   | GTRGGTCASTGGGTCA     | 1.00E-48  | -1.12E+02   | 0                      | 131                                                 | 5.24%                                  | 480.4                                                | 1.05%                                         |
| TEAD4(TEA)/Tropoblast-Tead4-ChIP-Seq(GSE37350)/Homer         | CCWGGGAATGY          | 1.00E-40  | -9.43E+01   | 0                      | 327                                                 | 13.08%                                 | 2661.3                                               | 5.80%                                         |
| GATA(Zf),IR4/iTreg-Gata3-ChIP-Seq(GSE20898)/Homer            | NAGATWNBATCTNN       | 1.00E-40  | -9.25E+01   | 0                      | 91                                                  | 3.64%                                  | 274.7                                                | 0.60%                                         |
| FOXP1(Forkhead)/H9-FOXP1-ChIP-Seq(GSE31006)/Homer            | NYTGTTTACHN          | 1.00E-37  | -8.57E+01   | 0                      | 217                                                 | 8.68%                                  | 1477.2                                               | 3.22%                                         |
| Gata4(Zf)/Heart-Gata4-ChIP-Seq(GSE35151)/Homer               | NBWGATAAGR           | 1.00E-37  | -8.55E+01   | 0                      | 407                                                 | 16.28%                                 | 3830.2                                               | 8.35%                                         |
| Foxo1(Forkhead)/RAW-Foxo1-ChIP-Seq(Fan et al.)/Homer         | CTGTTTAC             | 1.00E-37  | -8.53E+01   | 0                      | 619                                                 | 24.76%                                 | 6850.6                                               | 14.94%                                        |
| GATA3(Zf)/iTreg-Gata3-ChIP-Seq(GSE20898)/Homer               | AGATAASR             | 1.00E-33  | -7.76E+01   | 0                      | 555                                                 | 22.20%                                 | 6083.6                                               | 13.26%                                        |
| Nur77(NR)/K562-NR4A1-ChIP-Seq(GSE31363)/Homer                | TGACCTTNCNT          | 1.00E-33  | -7.67E+01   | 0                      | 122                                                 | 4.88%                                  | 595.3                                                | 1.30%                                         |
| TEAD(TEA)/Fibroblast-PU.1-ChIP-Seq(Unpublished)/Homer        | YCWGGGAATGY          | 1.00E-32  | -7.38E+01   | 0                      | 270                                                 | 10.80%                                 | 2246.4                                               | 4.90%                                         |
| AP-2alpha(AP2)/Hela-AP2alpha-ChIP-Seq(GSE31477)/Homer        | ATGCCCTGAGGC         | 1.00E-31  | -7.32E+01   | 0                      | 255                                                 | 10.20%                                 | 2070.4                                               | 4.51%                                         |
| Nr5a2(NR)/Pancreas-LRH1-ChIP-Seq(GSE34295)/Homer             | BTCAAGGTCA           | 1.00E-30  | -6.98E+01   | 0                      | 277                                                 | 11.08%                                 | 2392.9                                               | 5.22%                                         |
| GATA(Zf),IR3/iTreg-Gata3-ChIP-Seq(GSE20898)/Homer            | NNNNNBAGATAWYATCTVHN | 1.00E-29  | -6.73E+01   | 0                      | 127                                                 | 5.08%                                  | 709.2                                                | 1.55%                                         |
| AP-2gamma(AP2)/MCF7-TFAP2C-ChIP-Seq(GSE21234)/Homer          | SCCTSAGGSCAW         | 1.00E-27  | -6.44E+01   | 0                      | 293                                                 | 11.72%                                 | 2687                                                 | 5.86%                                         |
| Bach2(bZIP)/OCILy7-Bach2-ChIP-Seq(GSE44420)/Homer            | TGCTGAGTCA           | 1.00E-25  | -5.93E+01   | 0                      | 103                                                 | 4.12%                                  | 541.4                                                | 1.18%                                         |
| RORgt(NR)/EL4-RORgt.Flag-ChIP-Seq(GSE56019)/Homer            | AAYTAGGTCA           | 1.00E-24  | -5.57E+01   | 0                      | 93                                                  | 3.72%                                  | 474.8                                                | 1.04%                                         |
| GATA3(Zf),DR8/iTreg-Gata3-ChIP-Seq(GSE20898)/Homer           | AGATSTNDNNSAGATAASN  | 1.00E-22  | -5.27E+01   | 0                      | 65                                                  | 2.60%                                  | 254.5                                                | 0.56%                                         |
| TEAD2(TEA)/Py2T-Tead2-ChIP-Seq(GSE55709)/Homer               | CCWGGGAATGY          | 1.00E-22  | -5.17E+01   | 0                      | 201                                                 | 8.04%                                  | 1716.2                                               | 3.74%                                         |
| Gata2(Zf)/K562-GATA2-ChIP-Seq(GSE18829)/Homer                | BBCTTATCTS           | 1.00E-21  | -4.99E+01   | 0                      | 256                                                 | 10.24%                                 | 2457.7                                               | 5.36%                                         |
| NF1(CTF)/LNCAP-NF1-ChIP-Seq(Unpublished)/Homer               | CYTGCCABNSTGCCAR     | 1.00E-17  | -3.98E+01   | 0                      | 135                                                 | 5.40%                                  | 1082.1                                               | 2.36%                                         |
| Gata1(Zf)/K562-GATA1-ChIP-Seq(GSE18829)/Homer                | SAGATAAGR            | 1.00E-16  | -3.90E+01   | 0                      | 216                                                 | 8.64%                                  | 2133.7                                               | 4.65%                                         |
| Atf2(bZIP)/3T3L1-Atf2-ChIP-Seq(GSE56872)/Homer               | NRRTGACGTCAT         | 1.00E-14  | -3.26E+01   | 0                      | 140                                                 | 5.60%                                  | 1253.8                                               | 2.73%                                         |
| GATA3(Zf),DR4/iTreg-Gata3-ChIP-Seq(GSE20898)/Homer           | AGATGKDGAGATAAG      | 1.00E-13  | -3.21E+01   | 0                      | 58                                                  | 2.32%                                  | 320                                                  | 0.70%                                         |

|                                                                |                    |          |           |        |      |        |         |        |
|----------------------------------------------------------------|--------------------|----------|-----------|--------|------|--------|---------|--------|
| Nr5a2(NR)/mES-Nr5a2-ChIP-Seq(GSE19019)/Homer                   | BTCAAGGTCA         | 1.00E-13 | -3.04E+01 | 0      | 173  | 6.92%  | 1727.8  | 3.77%  |
| RXR(NR),DR1/3T3L1-RXR-ChIP-Seq(GSE13511)/Homer                 | TAGGGCAAAGGTCA     | 1.00E-13 | -3.04E+01 | 0      | 289  | 11.56% | 3383.4  | 7.38%  |
| Bach1(bZIP)/K562-Bach1-ChIP-Seq(GSE31477)/Homer                | AWWNTGCTGAGTCAT    | 1.00E-11 | -2.61E+01 | 0      | 35   | 1.40%  | 153.1   | 0.33%  |
| Smad3(MAD)/NPC-Smad3-ChIP-Seq(GSE36673)/Homer                  | TWGTCTGV           | 1.00E-10 | -2.51E+01 | 0      | 727  | 29.08% | 10675.7 | 23.28% |
| Tlx?(NR)/NPC-H3K4me1-ChIP-Seq(GSE16256)/Homer                  | CTGGCAGSCTGCCA     | 1.00E-10 | -2.43E+01 | 0      | 121  | 4.84%  | 1156.9  | 2.52%  |
| PR(NR)/T47D-PR-ChIP-Seq(GSE31130)/Homer                        | VAGRACAKNCTGTBC    | 1.00E-10 | -2.36E+01 | 0      | 533  | 21.32% | 7502.5  | 16.36% |
| NF-E2(bZIP)/K562-NFE2-ChIP-Seq(GSE31477)/Homer                 | GATGACTCAGCA       | 1.00E-10 | -2.34E+01 | 0      | 33   | 1.32%  | 152.8   | 0.33%  |
| EBF1(EBF)/Near-E2A-ChIP-Seq(GSE21512)/Homer                    | GTCCCWGGGGGA       | 1.00E-10 | -2.33E+01 | 0      | 220  | 8.80%  | 2573.4  | 5.61%  |
| ARE(NR)/LNCAP-AR-ChIP-Seq(GSE27824)/Homer                      | RGRACASNSTGTICYB   | 1.00E-09 | -2.28E+01 | 0      | 83   | 3.32%  | 697.4   | 1.52%  |
| Atf1(bZIP)/K562-ATF1-ChIP-Seq(GSE31477)/Homer                  | GATGACGTCA         | 1.00E-09 | -2.14E+01 | 0      | 260  | 10.40% | 3237    | 7.06%  |
| c-Jun-CRE(bZIP)/K562-cJun-ChIP-Seq(GSE31477)/Homer             | ATGACGTCATCY       | 1.00E-09 | -2.12E+01 | 0      | 126  | 5.04%  | 1286.3  | 2.80%  |
| NF1:FOXA1(CTF,Forkhead)/LNCAP-FOXA1-ChIP-Seq(GSE27824)/Homer   | WNTGTTTRYTTGGCA    | 1.00E-09 | -2.10E+01 | 0      | 29   | 1.16%  | 132.4   | 0.29%  |
| Nrf2(bZIP)/Lymphoblast-Nrf2-ChIP-Seq(GSE37589)/Homer           | HTGCTGAGTCAT       | 1.00E-08 | -1.99E+01 | 0      | 29   | 1.16%  | 139.2   | 0.30%  |
| PPARE(NR),DR1/3T3L1-Pparg-ChIP-Seq(GSE13511)/Homer             | TGACCTTGGCCCA      | 1.00E-08 | -1.98E+01 | 0      | 237  | 9.48%  | 2942.8  | 6.42%  |
| MafA(bZIP)/Islet-MafA-ChIP-Seq(GSE30298)/Homer                 | TGCTGACTCA         | 1.00E-08 | -1.97E+01 | 0      | 213  | 8.52%  | 2581.2  | 5.63%  |
| Atf7(bZIP)/3T3L1-Atf7-ChIP-Seq(GSE56872)/Homer                 | NGRTGACGTCA        | 1.00E-07 | -1.73E+01 | 0      | 188  | 7.52%  | 2285.2  | 4.98%  |
| Smad2(MAD)/ES-SMAD2-ChIP-Seq(GSE29422)/Homer                   | CTGTCTGG           | 1.00E-06 | -1.50E+01 | 0      | 380  | 15.20% | 5430.2  | 11.84% |
| Cdx2(Homeobox)/mES-Cdx2-ChIP-Seq(GSE14586)/Homer               | GYMATAAAAH         | 1.00E-06 | -1.45E+01 | 0      | 207  | 8.28%  | 2679.9  | 5.84%  |
| STAT5(Stat)/mCD4+-Stat5-ChIP-Seq(GSE12346)/Homer               | RTTCTNAGAAA        | 1.00E-06 | -1.43E+01 | 0      | 84   | 3.36%  | 865.9   | 1.89%  |
| MafK(bZIP)/C2C12-MafK-ChIP-Seq(GSE36030)/Homer                 | GCTGASTCAGCA       | 1.00E-06 | -1.39E+01 | 0      | 63   | 2.52%  | 593.1   | 1.29%  |
| Hoxc9(Homeobox)/Ainv15-Hoxc9-ChIP-Seq(GSE21812)/Homer          | GGCCATAAATCA       | 1.00E-05 | -1.38E+01 | 0      | 150  | 6.00%  | 1833.9  | 4.00%  |
| SCL(bHLH)/HPC7-Scl-ChIP-Seq(GSE13511)/Homer                    | AVCAGCTG           | 1.00E-05 | -1.37E+01 | 0      | 1019 | 40.76% | 16588.1 | 36.17% |
| NF1-halfsite(CTF)/LNCaP-NF1-ChIP-Seq(Unpublished)/Homer        | YTGCCAAG           | 1.00E-05 | -1.34E+01 | 0      | 394  | 15.76% | 5754.7  | 12.55% |
| HOXA9(Homeobox)/HSC-Hoxa9-ChIP-Seq(GSE33509)/Homer             | GGCCATAAATCA       | 1.00E-05 | -1.26E+01 | 0      | 188  | 7.52%  | 2458.3  | 5.36%  |
| Sox10(HMG)/SciaticNerve-Sox3-ChIP-Seq(GSE35132)/Homer          | CCWTTGTYYB         | 1.00E-05 | -1.21E+01 | 0      | 400  | 16.00% | 5937.2  | 12.95% |
| Bcl6(Zf)/Liver-Bcl6-ChIP-Seq(GSE31578)/Homer                   | NNNCTTCCAGGAAA     | 1.00E-05 | -1.20E+01 | 0      | 274  | 10.96% | 3860.3  | 8.42%  |
| Six1(Homeobox)/Myoblast-Six1-ChIP-Seq(GSE20150)/Homer          | GKVTCADRTTWC       | 1.00E-04 | -1.12E+01 | 0.0001 | 78   | 3.12%  | 855.2   | 1.86%  |
| Unknown-ESC-element(?)/mES-Nanog-ChIP-Seq(GSE11724)/Homer      | CACAGCAGGGGG       | 1.00E-04 | -9.86E+00 | 0.0002 | 128  | 5.12%  | 1640.7  | 3.58%  |
| RARg(NR)/ES-RARg-ChIP-Seq(GSE30538)/Homer                      | AGGTCAAGGTCA       | 1.00E-04 | -9.37E+00 | 0.0003 | 18   | 0.72%  | 114     | 0.25%  |
| STAT6(Stat)/Macrophage-Stat6-ChIP-Seq(GSE38377)/Homer          | TTCKNAGAA          | 1.00E-04 | -9.28E+00 | 0.0004 | 121  | 4.84%  | 1555.2  | 3.39%  |
| JunD(bZIP)/K562-JunD-ChIP-Seq/Homer                            | ATGACGTCATCN       | 1.00E-03 | -9.12E+00 | 0.0004 | 32   | 1.28%  | 279.8   | 0.61%  |
| Oct4:Sox17(POU,Homeobox,HMG)/F9-Sox17-ChIP-Seq(GSE44553)/Homer | CCATTGTATGCAAA     | 1.00E-03 | -8.96E+00 | 0.0005 | 45   | 1.80%  | 451.9   | 0.99%  |
| Egr2(Zf)/Thymocytes-Egr2-ChIP-Seq(GSE34254)/Homer              | NGCGTGGGCGGR       | 1.00E-03 | -8.55E+00 | 0.0007 | 33   | 1.32%  | 301.8   | 0.66%  |
| Egr1(Zf)/K562-Egr1-ChIP-Seq(GSE32465)/Homer                    | TGCGTGGGYG         | 1.00E-03 | -8.45E+00 | 0.0008 | 110  | 4.40%  | 1418.7  | 3.09%  |
| FXR(NR),IR1/Liver-FXR-ChIP-Seq(Chong et al.)/Homer             | AGGTCANTGACCTB     | 1.00E-03 | -8.39E+00 | 0.0008 | 100  | 4.00%  | 1267.9  | 2.76%  |
| TR4(NR),DR1/Hela-TR4-ChIP-Seq(GSE24685)/Homer                  | GAGGTCAAAGGTCA     | 1.00E-03 | -7.83E+00 | 0.0015 | 31   | 1.24%  | 288.3   | 0.63%  |
| PRDM14(Zf)/H1-PRDM14-ChIP-Seq(GSE22767)/Homer                  | GGTCTCTAACY        | 1.00E-03 | -7.69E+00 | 0.0017 | 74   | 2.96%  | 899.2   | 1.96%  |
| STAT1(Stat)/HelaS3-STAT1-ChIP-Seq(GSE12782)/Homer              | NATTTCCNGGAAAT     | 1.00E-03 | -7.50E+00 | 0.002  | 63   | 2.52%  | 742.3   | 1.62%  |
| GFY-Staf(?),Zf)/Promoter/Homer                                 | RACTACAATCCAGAAGKC | 1.00E-03 | -7.25E+00 | 0.0025 | 14   | 0.56%  | 92.9    | 0.20%  |
| Pdx1(Homeobox)/Islet-Pdx1-ChIP-Seq(SRA008281)/Homer            | YCATYAATCA         | 1.00E-03 | -6.91E+00 | 0.0035 | 251  | 10.04% | 3793.7  | 8.27%  |

|                                                                          |                      |          |           |        |     |        |        |        |
|--------------------------------------------------------------------------|----------------------|----------|-----------|--------|-----|--------|--------|--------|
| Sox3(HMG)/NPC-Sox3-ChIP-Seq(GSE33059)/Homer                              | CCWTTGTGY            | 1.00E-02 | -6.77E+00 | 0.0039 | 403 | 16.12% | 6397.2 | 13.95% |
| Rbpj1(?)/Panc1-Rbpj1-ChIP-Seq(GSE47459)/Homer                            | HTTTCCCASG           | 1.00E-02 | -6.44E+00 | 0.0054 | 288 | 11.52% | 4455.2 | 9.71%  |
| Foxh1(Forkhead)/hESC-FOXH1-ChIP-Seq(GSE29422)/Homer                      | NNTGTGGATTSS         | 1.00E-02 | -6.43E+00 | 0.0054 | 148 | 5.92%  | 2118.1 | 4.62%  |
| PAX5(Paired,Homeobox),condensed/GM12878-PAX5-ChIP-Seq(GSE32465)/Homer    | GTCACGCTCSCTGM       | 1.00E-02 | -6.35E+00 | 0.0057 | 30  | 1.20%  | 304    | 0.66%  |
| NFkB-p65-Rel(RHD)/ThioMac-LPS-Expression(GSE23622)/Homer                 | GGAAATTC             | 1.00E-02 | -6.30E+00 | 0.006  | 17  | 0.68%  | 137.5  | 0.30%  |
| STAT4(Stat)/CD4-Stat4-ChIP-Seq(GSE22104)/Homer                           | NYTTCWGGGAAR         | 1.00E-02 | -5.93E+00 | 0.0086 | 189 | 7.56%  | 2826   | 6.16%  |
| Olig2(bHLH)/Neuron-Olig2-ChIP-Seq(GSE30882)/Homer                        | RCCATMTGTT           | 1.00E-02 | -5.87E+00 | 0.009  | 431 | 17.24% | 6972.4 | 15.20% |
| E2F7(E2F)/Hela-E2F7-ChIP-Seq(GSE32673)/Homer                             | VDTTTCCCGCCA         | 1.00E-02 | -5.79E+00 | 0.0096 | 19  | 0.76%  | 169.4  | 0.37%  |
| Ap4(bHLH)/AML-Tfap4-ChIP-Seq(GSE45738)/Homer                             | NAHCAGCTGD           | 1.00E-02 | -5.75E+00 | 0.0099 | 243 | 9.72%  | 3747.7 | 8.17%  |
| Smad4(MAD)/ESC-SMAD4-ChIP-Seq(GSE29422)/Homer                            | VBSYGTCTGG           | 1.00E-02 | -5.35E+00 | 0.0146 | 347 | 13.88% | 5567.8 | 12.14% |
| GATA:SCL(Zf,bHLH)/Ter119-SCL-ChIP-Seq(GSE18720)/Homer                    | CRGCTGBNNGNSNSAGATAA | 1.00E-02 | -5.24E+00 | 0.0161 | 28  | 1.12%  | 300.8  | 0.66%  |
| Unknown(Homeobox)/Limb-p300-ChIP-Seq/Homer                               | SSCMATWAAA           | 1.00E-02 | -5.03E+00 | 0.0196 | 159 | 6.36%  | 2388.9 | 5.21%  |
| ZFX(Zf)/mES-Zfx-ChIP-Seq(GSE11431)/Homer                                 | AGGCCTRG             | 1.00E-02 | -4.99E+00 | 0.0202 | 248 | 9.92%  | 3897.8 | 8.50%  |
| EBF(EBF)/proBcell-EBF-ChIP-Seq(GSE21978)/Homer                           | DGTCCCYRGGGA         | 1.00E-02 | -4.87E+00 | 0.0225 | 38  | 1.52%  | 455    | 0.99%  |
| Atoh1(bHLH)/Cerebellum-Atoh1-ChIP-Seq(GSE22111)/Homer                    | VNRVCAGCTGGY         | 1.00E-02 | -4.81E+00 | 0.0237 | 221 | 8.84%  | 3452.2 | 7.53%  |
| Sox4(HMG)/proB-Sox4-ChIP-Seq(GSE50066)/Homer                             | YCTTTGTTCC           | 1.00E-02 | -4.73E+00 | 0.0254 | 182 | 7.28%  | 2797.9 | 6.10%  |
| HNF4a(NR),DR1/HepG2-HNF4a-ChIP-Seq(GSE25021)/Homer                       | CARRGKBCAAAGTYCA     | 1.00E-02 | -4.63E+00 | 0.0276 | 99  | 3.96%  | 1423.9 | 3.10%  |
| Tcfcp2l1(CP2)/mES-Tcfcp2l1-ChIP-Seq(GSE11431)/Homer                      | NRAACCRGTTYRAACCRGYT | 1.00E-01 | -4.59E+00 | 0.0284 | 28  | 1.12%  | 316.6  | 0.69%  |
| BMXB(HTH)/Hela-BMYB-ChIP-Seq(GSE27030)/Homer                             | NHAACBGGYV           | 1.00E-01 | -4.57E+00 | 0.0289 | 317 | 12.68% | 5128.1 | 11.18% |
| HRE(HSF)/HepG2-HSF1-ChIP-Seq(GSE31477)/Homer                             | BSTTCTRGAABVTTYAGAA  | 1.00E-01 | -4.37E+00 | 0.0348 | 28  | 1.12%  | 322.6  | 0.70%  |
| GRE(NR),IR3/RAW264.7-GRE-ChIP-Seq(Unpublished)/Homer                     | VAGRACAKWCTGTTC      | 1.00E-01 | -4.25E+00 | 0.0388 | 51  | 2.04%  | 674.4  | 1.47%  |
| KLF5(Zf)/LoVo-KLF5-ChIP-Seq(GSE49402)/Homer                              | DGGGYGKGGC           | 1.00E-01 | -4.19E+00 | 0.0407 | 225 | 9.00%  | 3576.7 | 7.80%  |
| SPDEF(ETS)/VCaP-SPDEF-ChIP-Seq(SRA014231)/Homer                          | ASWTCCTGBT           | 1.00E-01 | -4.10E+00 | 0.0441 | 190 | 7.60%  | 2985.7 | 6.51%  |
| Klf4(Zf)/mES-Klf4-ChIP-Seq(GSE11431)/Homer                               | GCCACACCCA           | 1.00E-01 | -3.97E+00 | 0.0498 | 80  | 3.20%  | 1151.9 | 2.51%  |
| Stat3+il21(Stat)/CD4-Stat3-ChIP-Seq(GSE19198)/Homer                      | SVYTTCCNGGAARB       | 1.00E-01 | -3.80E+00 | 0.0587 | 122 | 4.88%  | 1858.3 | 4.05%  |
| PAX3:FKHR-fusion(Paired,Homeobox)/Rh4-PAX3:FKHR-ChIP-Seq(GSE19063)/Homer | ACCRTGACTAATTNN      | 1.00E-01 | -3.58E+00 | 0.0725 | 47  | 1.88%  | 640.8  | 1.40%  |
| MITF(bHLH)/MastCells-MITF-ChIP-Seq(GSE48085)/Homer                       | RTCATGTGAC           | 1.00E-01 | -3.49E+00 | 0.0785 | 207 | 8.28%  | 3336.8 | 7.28%  |
| bZIP:IRF(bZIP,IRF)/Th17-BatF-ChIP-Seq(GSE39756)/Homer                    | NAGTTTCABTHTGACTNW   | 1.00E-01 | -3.42E+00 | 0.0829 | 106 | 4.24%  | 1617.4 | 3.53%  |
| MYB(HTH)/ERMYB-Myb-ChIPSeq(GSE22095)/Homer                               | GGCVGTR              | 1.00E-01 | -3.39E+00 | 0.0845 | 351 | 14.04% | 5864.1 | 12.79% |
| CRE(bZIP)/Promoter/Homer                                                 | CSGTGACGTCAC         | 1.00E-01 | -3.39E+00 | 0.0845 | 42  | 1.68%  | 569.6  | 1.24%  |
| AMYB(HTH)/Testes-AMYB-ChIP-Seq(GSE44588)/Homer                           | TGGCAGTTGG           | 1.00E-01 | -3.38E+00 | 0.0845 | 314 | 12.56% | 5214.8 | 11.37% |
| EKLF(Zf)/Erythrocyte-Klf1-ChIP-Seq(GSE20478)/Homer                       | NWGGGTGTGGCY         | 1.00E-01 | -3.19E+00 | 0.1007 | 48  | 1.92%  | 674.3  | 1.47%  |
| NFkB-p65(RHD)/GM12878-p65-ChIP-Seq(GSE19485)/Homer                       | WGGGGATTTC           | 1.00E-01 | -3.13E+00 | 0.1063 | 86  | 3.44%  | 1303.8 | 2.84%  |
| RUNX(Runt)/HPC7-Runx1-ChIP-Seq(GSE22178)/Homer                           | SAAACCACAG           | 1.00E-01 | -3.05E+00 | 0.1142 | 154 | 6.16%  | 2466.7 | 5.38%  |
| Rfx1(HTH)/NPC-H3K4me1-ChIP-Seq(GSE16256)/Homer                           | KGTTGCCATGGCAA       | 1.00E-01 | -2.87E+00 | 0.1354 | 35  | 1.40%  | 482    | 1.05%  |
| p63(p53)/Keratinocyte-p63-ChIP-Seq(GSE17611)/Homer                       | NNDRCATGYCYNRRCATGYH | 1.00E-01 | -2.84E+00 | 0.1371 | 67  | 2.68%  | 1005.6 | 2.19%  |
| Tcf12(bHLH)/GM12878-Tcf12-ChIP-Seq(GSE32465)/Homer                       | VDCAGTYT             | 1.00E-01 | -2.77E+00 | 0.1458 | 174 | 6.96%  | 2840.9 | 6.19%  |
| NeuroD1(bHLH)/Islet-NeuroD1-ChIP-Seq(GSE30298)/Homer                     | GCCATCTGTT           | 1.00E-01 | -2.77E+00 | 0.1458 | 161 | 6.44%  | 2615.4 | 5.70%  |
| Tcf4(HMG)/Hct116-Tcf4-ChIP-Seq(SRA012054)/Homer                          | ASATCAAAGGVA         | 1.00E-01 | -2.64E+00 | 0.164  | 94  | 3.76%  | 1475.1 | 3.22%  |
| GFY(?)/Promoter/Homer                                                    | ACTACAATTC           | 1.00E-01 | -2.59E+00 | 0.1712 | 13  | 0.52%  | 151.1  | 0.33%  |

|                                                                      |                       |          |           |        |     |        |        |        |
|----------------------------------------------------------------------|-----------------------|----------|-----------|--------|-----|--------|--------|--------|
| Meis1(Homeobox)/MastCells-Meis1-ChIP-Seq(GSE48085)/Homer             | VGCTGWCAVB            | 1.00E-01 | -2.58E+00 | 0.1712 | 405 | 16.20% | 6946.3 | 15.15% |
| HOXD13(Homeobox)/Chicken-Hoxd13-ChIP-Seq(GSE38910)/Homer             | NCYAATAAAA            | 1.00E-01 | -2.58E+00 | 0.1712 | 249 | 9.96%  | 4178.7 | 9.11%  |
| RFX(HTH)/K562-RFX3-ChIP-Seq(SRA012198)/Homer                         | CGGTTGCCATGGCAAC      | 1.00E-01 | -2.56E+00 | 0.1712 | 12  | 0.48%  | 137.2  | 0.30%  |
| MafF(bZIP)/HepG2-Maff-ChIP-Seq(GSE31477)/Homer                       | HWWGTCAGCAWWTTT       | 1.00E-01 | -2.47E+00 | 0.1863 | 73  | 2.92%  | 1132.9 | 2.47%  |
| X-box(HTH)/NPC-H3K4me1-ChIP-Seq(GSE16256)/Homer                      | GGTTGCCATGGCAA        | 1.00E-01 | -2.43E+00 | 0.192  | 20  | 0.80%  | 262.2  | 0.57%  |
| HIF-1a(bHLH)/MCF7-HIF1a-ChIP-Seq(GSE28352)/Homer                     | TACGTGCV              | 1.00E-01 | -2.36E+00 | 0.205  | 45  | 1.80%  | 670.5  | 1.46%  |
| Phox2a(Homeobox)/Neuron-Phox2a-ChIP-Seq(GSE31456)/Homer              | YTAATYNRATTA          | 1.00E-01 | -2.34E+00 | 0.2073 | 87  | 3.48%  | 1381.5 | 3.01%  |
| Rfx2(HTH)/LoVo-RFX2-ChIP-Seq(GSE49402)/Homer                         | GTTGCCATGGCAACM       | 1.00E+00 | -2.30E+00 | 0.214  | 14  | 0.56%  | 174.7  | 0.38%  |
| E2F(E2F)/Hela-CellCycle-Expression/Homer                             | TTSGCGCGAAAA          | 1.00E+00 | -2.28E+00 | 0.2172 | 7   | 0.28%  | 72.3   | 0.16%  |
| NFAT(RHD)/Jurkat-NFATC1-ChIP-Seq(Jolma et al.)/Homer                 | ATTTCCATT             | 1.00E+00 | -2.26E+00 | 0.2198 | 166 | 6.64%  | 2761   | 6.02%  |
| Stat3(Stat)/mES-Stat3-ChIP-Seq(GSE11431)/Homer                       | TTCCGGGAA             | 1.00E+00 | -2.05E+00 | 0.2676 | 79  | 3.16%  | 1269.8 | 2.77%  |
| RUNX-AML(Runt)/CD4+-PollI-ChIP-Seq(Barski et al.)/Homer              | GCTGTGGTTW            | 1.00E+00 | -2.01E+00 | 0.2755 | 156 | 6.24%  | 2616.1 | 5.70%  |
| Brachyury(T-box)/Mesoendoderm-Brachyury-ChIP-exo(GSE54963)/Homer     | ANTTMRASBNNGTGYKAAN   | 1.00E+00 | -1.96E+00 | 0.2871 | 58  | 2.32%  | 916.3  | 2.00%  |
| Ets1-distal(ETS)/CD4+-PollI-ChIP-Seq(Barski et al.)/Homer            | MACAGGAAGT            | 1.00E+00 | -1.96E+00 | 0.2871 | 53  | 2.12%  | 831.4  | 1.81%  |
| FOXA1:AR(Forkhead,NR)/LNCAP-AR-ChIP-Seq(GSE27824)/Homer              | AGTAAACAAAAAGAACAND   | 1.00E+00 | -1.94E+00 | 0.2886 | 18  | 0.72%  | 249.9  | 0.54%  |
| Tcf3(HMG)/mES-Tcf3-ChIP-Seq(GSE11724)/Homer                          | ASWTCAAAGG            | 1.00E+00 | -1.89E+00 | 0.3014 | 49  | 1.96%  | 768.1  | 1.67%  |
| RUNX1(Runt)/Jurkat-RUNX1-ChIP-Seq(GSE29180)/Homer                    | AAACCACARM            | 1.00E+00 | -1.85E+00 | 0.3113 | 214 | 8.56%  | 3666.7 | 7.99%  |
| EBNA1(EBV virus)/Raji-EBNA1-ChIP-Seq(GSE30709)/Homer                 | GGYAGCAVDGTDCCCNNN    | 1.00E+00 | -1.85E+00 | 0.3113 | 3   | 0.12%  | 25.8   | 0.06%  |
| Ascl1(bHLH)/NeuralTubes-Ascl1-ChIP-Seq(GSE55840)/Homer               | NNVVCAGCTGBN          | 1.00E+00 | -1.78E+00 | 0.3307 | 309 | 12.36% | 5377.7 | 11.73% |
| VDR(NR),DR3/GM10855-VDR+vitD-ChIP-Seq(GSE22484)/Homer                | ARAGGTCANWGAGTTCANNN  | 1.00E+00 | -1.77E+00 | 0.3314 | 38  | 1.52%  | 590.8  | 1.29%  |
| Hoxb4(Homeobox)/ES-Hoxb4-ChIP-Seq(GSE34014)/Homer                    | TGATTRATGGCY          | 1.00E+00 | -1.73E+00 | 0.3429 | 43  | 1.72%  | 678.4  | 1.48%  |
| RUNX2(Runt)/PCa-RUNX2-ChIP-Seq(GSE33889)/Homer                       | NWAACCACADNN          | 1.00E+00 | -1.72E+00 | 0.3436 | 179 | 7.16%  | 3065.6 | 6.68%  |
| E2F1(E2F)/Hela-E2F1-ChIP-Seq(GSE22478)/Homer                         | CWGGCGGGAA            | 1.00E+00 | -1.62E+00 | 0.377  | 25  | 1.00%  | 380.7  | 0.83%  |
| E2F6(E2F)/Hela-E2F6-ChIP-Seq(GSE31477)/Homer                         | GGCGGGAARN            | 1.00E+00 | -1.59E+00 | 0.3828 | 54  | 2.16%  | 878.6  | 1.92%  |
| NFAT:AP1(RHD,bZIP)/Jurkat-NFATC1-ChIP-Seq(Jolma et al.)/Homer        | SARTGGAAAAWRTGAGTCAB  | 1.00E+00 | -1.59E+00 | 0.3828 | 31  | 1.24%  | 483.2  | 1.05%  |
| E2F4(E2F)/K562-E2F4-ChIP-Seq(GSE31477)/Homer                         | GGCGGGAHAH            | 1.00E+00 | -1.50E+00 | 0.4153 | 44  | 1.76%  | 713.2  | 1.56%  |
| Sox2(HMG)/mES-Sox2-ChIP-Seq(GSE11431)/Homer                          | BCCATTGTTC            | 1.00E+00 | -1.44E+00 | 0.4384 | 170 | 6.80%  | 2950.3 | 6.43%  |
| Tbox:Smad(T-box,MAD)/ESCd5-Smad2_3-ChIP-Seq(GSE29422)/Homer          | AGGTGHGAGACA          | 1.00E+00 | -1.38E+00 | 0.4624 | 38  | 1.52%  | 619    | 1.35%  |
| Hnf1(Homeobox)/Liver-Foxa2-ChIP-Seq(GSE25694)/Homer                  | GGTTAAWCATTA          | 1.00E+00 | -1.38E+00 | 0.4624 | 27  | 1.08%  | 429.8  | 0.94%  |
| CEBP(bZIP)/ThioMac-CEBPb-ChIP-Seq(GSE21512)/Homer                    | ATTGCGCAAC            | 1.00E+00 | -1.37E+00 | 0.4624 | 161 | 6.44%  | 2801.1 | 6.11%  |
| Atf4(bZIP)/MEF-Atf4-ChIP-Seq(GSE35681)/Homer                         | MTGATGCAAT            | 1.00E+00 | -1.33E+00 | 0.4745 | 67  | 2.68%  | 1132.6 | 2.47%  |
| ETS:RUNX(ETS,Runt)/Jurkat-RUNX1-ChIP-Seq(GSE17954)/Homer             | RCAGGATGTGGT          | 1.00E+00 | -1.30E+00 | 0.4857 | 14  | 0.56%  | 212.4  | 0.46%  |
| Lhx3(Homeobox)/Neuron-Lhx3-ChIP-Seq(GSE31456)/Homer                  | ADBTAATTAR            | 1.00E+00 | -1.29E+00 | 0.4886 | 368 | 14.72% | 6552.9 | 14.29% |
| Pax7(Paired,Homeobox),longest/Myoblast-Pax7-ChIP-Seq(GSE25064)/Homer | NTAATTDGCVYAATTANNWWD | 1.00E+00 | -1.21E+00 | 0.524  | 7   | 0.28%  | 99.3   | 0.22%  |
| RBPJ:Ebox(?,bHLH)/Panc1-Rbpj1-ChIP-Seq(GSE47459)/Homer               | GGGRAARRGRMCAGMTG     | 1.00E+00 | -1.11E+00 | 0.5781 | 46  | 1.84%  | 785.5  | 1.71%  |
| BORIS(Zf)/K562-CTCF-ChIP-Seq(GSE32465)/Homer                         | CNNBRGCGCCCCCTGSGGC   | 1.00E+00 | -9.89E-01 | 0.6458 | 17  | 0.68%  | 282.4  | 0.62%  |
| CEBP:AP1(bZIP)/ThioMac-CEBPb-ChIP-Seq(GSE21512)/Homer                | DRTGTTGCAA            | 1.00E+00 | -9.85E-01 | 0.6458 | 161 | 6.44%  | 2875.2 | 6.27%  |
| ETS:E-box(ETS,bHLH)/HPC7-Scl-ChIP-Seq(GSE22178)/Homer                | AGGAARCAAGCTG         | 1.00E+00 | -9.71E-01 | 0.649  | 15  | 0.60%  | 248.4  | 0.54%  |
| HIF2a(bHLH)/785_O-HIF2a-ChIP-Seq(GSE34871)/Homer                     | GCACGTACCC            | 1.00E+00 | -9.63E-01 | 0.6504 | 53  | 2.12%  | 927.3  | 2.02%  |
| Myf5(bHLH)/GM-Myf5-ChIP-Seq(GSE24852)/Homer                          | BAACAGCTGT            | 1.00E+00 | -9.55E-01 | 0.6512 | 119 | 4.76%  | 2120.6 | 4.62%  |

|                                                                         |                      |          |           |        |     |        |         |        |
|-------------------------------------------------------------------------|----------------------|----------|-----------|--------|-----|--------|---------|--------|
| ZNF143 STAF(Zf)/CUTLL-ZNF143-ChIP-Seq(GSE29600)/Homer                   | ATTTCCAGVAKSCY       | 1.00E+00 | -9.40E-01 | 0.6572 | 51  | 2.04%  | 895     | 1.95%  |
| ETV1(ETS)/GIST48-ETV1-ChIP-Seq(GSE22441)/Homer                          | AACCGGAAGT           | 1.00E+00 | -9.32E-01 | 0.6579 | 212 | 8.48%  | 3814.1  | 8.32%  |
| TCFL2(HMG)/K562-TCF7L2-ChIP-Seq(GSE29196)/Homer                         | ACWTCAAAGG           | 1.00E+00 | -9.05E-01 | 0.6715 | 13  | 0.52%  | 217.4   | 0.47%  |
| Maz(Zf)/HepG2-Maz-ChIP-Seq(GSE31477)/Homer                              | GGGGGGGG             | 1.00E+00 | -8.50E-01 | 0.7051 | 152 | 6.08%  | 2742.9  | 5.98%  |
| ELF5(ETS)/T47D-ELF5-ChIP-Seq(GSE30407)/Homer                            | ACVAGGAAGT           | 1.00E+00 | -8.45E-01 | 0.7051 | 113 | 4.52%  | 2033.2  | 4.43%  |
| Rfx5(HTH)/GM12878-Rfx5-ChIP-Seq(GSE31477)/Homer                         | SCCTAGCAACAG         | 1.00E+00 | -8.43E-01 | 0.7051 | 52  | 2.08%  | 925.9   | 2.02%  |
| CTCF(Zf)/CD4+-CTCF-ChIP-Seq(Barski et al.)/Homer                        | AYAGTGCCMYCTRGTGGCCA | 1.00E+00 | -8.34E-01 | 0.7051 | 11  | 0.44%  | 186.6   | 0.41%  |
| ZNF711(Zf)/SHSY5Y-ZNF711-ChIP-Seq(GSE20673)/Homer                       | AGGCCTAG             | 1.00E+00 | -8.19E-01 | 0.71   | 316 | 12.64% | 5745.2  | 12.53% |
| Nanog(Homeobox)/mES-Nanog-ChIP-Seq(GSE11724)/Homer                      | RGCCATTAAC           | 1.00E+00 | -8.18E-01 | 0.71   | 906 | 36.24% | 16547.3 | 36.08% |
| Otx2(Homeobox)/EpiLC-Otx2-ChIP-Seq(GSE56098)/Homer                      | NYTAATCCYB           | 1.00E+00 | -8.17E-01 | 0.71   | 180 | 7.20%  | 3261.4  | 7.11%  |
| Elk4(ETS)/Hela-Elk4-ChIP-Seq(GSE31477)/Homer                            | NRYTTCCGGY           | 1.00E+00 | -8.14E-01 | 0.71   | 63  | 2.52%  | 1129.1  | 2.46%  |
| ZBTB33(Zf)/GM12878-ZBTB33-ChIP-Seq(GSE32465)/Homer                      | GGVTCTCGCGAGAAC      | 1.00E+00 | -8.12E-01 | 0.71   | 3   | 0.12%  | 46      | 0.10%  |
| TATA-Box(TBP)/Promoter/Homer                                            | CCTTTTAWAGSC         | 1.00E+00 | -8.09E-01 | 0.71   | 232 | 9.28%  | 4213.9  | 9.19%  |
| STAT6(Stat)/CD4-Stat6-ChIP-Seq(GSE22104)/Homer                          | ABTTCYRRGAA          | 1.00E+00 | -8.02E-01 | 0.71   | 87  | 3.48%  | 1568.8  | 3.42%  |
| HRE(HSF)/Striatum-HSF1-ChIP-Seq(GSE38000)/Homer                         | TTCTAGAAABNTTCTA     | 1.00E+00 | -7.99E-01 | 0.71   | 32  | 1.28%  | 568.5   | 1.24%  |
| Sox6(HMG)/Myotubes-Sox6-ChIP-Seq(GSE32627)/Homer                        | CCATTGTTNY           | 1.00E+00 | -7.74E-01 | 0.71   | 325 | 13.00% | 5925.1  | 12.92% |
| HIF-1b(HLH)/T47D-HIF1b-ChIP-Seq(GSE59937)/Homer                         | RTACGTGC             | 1.00E+00 | -7.62E-01 | 0.7126 | 170 | 6.80%  | 3093.5  | 6.75%  |
| OCT4-SOX2-TCF-NANOG(POU,Homeobox,HMG)/mES-Oct4-ChIP-Seq(GSE11431)/Homer | ATTTGCATAACAATG      | 1.00E+00 | -7.52E-01 | 0.7153 | 34  | 1.36%  | 610.4   | 1.33%  |
| Sp1(Zf)/Promoter/Homer                                                  | GGCCCCGCCCC          | 1.00E+00 | -7.50E-01 | 0.7153 | 24  | 0.96%  | 428.2   | 0.93%  |
| YY1(Zf)/Promoter/Homer                                                  | CAAGATGGCGGC         | 1.00E+00 | -7.39E-01 | 0.7163 | 9   | 0.36%  | 156.9   | 0.34%  |
| MyoG(bHLH)/C2C12-MyoG-ChIP-Seq(GSE36024)/Homer                          | AACAGCTG             | 1.00E+00 | -6.45E-01 | 0.7824 | 177 | 7.08%  | 3255.4  | 7.10%  |
| MyoD(bHLH)/Myotube-MyoD-ChIP-Seq(GSE21614)/Homer                        | RRCAGCTGYTSY         | 1.00E+00 | -6.41E-01 | 0.7824 | 117 | 4.68%  | 2153.1  | 4.69%  |
| CEBP:CEBP(bZIP)/MEF-Chop-ChIP-Seq(GSE35681)/Homer                       | NTNATGCAAYMNNHTGMAAY | 1.00E+00 | -6.41E-01 | 0.7824 | 28  | 1.12%  | 514.7   | 1.12%  |
| Pax7(Paired,Homeobox)/Myoblast-Pax7-ChIP-Seq(GSE25064)/Homer            | TAATCAATTA           | 1.00E+00 | -6.34E-01 | 0.7824 | 20  | 0.80%  | 367.8   | 0.80%  |
| Pit1(Homeobox)/GCrat-Pit1-ChIP-Seq(GSE58009)/Homer                      | ATGMATATDC           | 1.00E+00 | -6.29E-01 | 0.7824 | 215 | 8.60%  | 3959.5  | 8.63%  |
| Pax8(Paired,Homeobox)/Thyroid-Pax8-ChIP-Seq(GSE26938)/Homer             | GTGATGCHTGRCTGS      | 1.00E+00 | -6.25E-01 | 0.7824 | 58  | 2.32%  | 1070.3  | 2.33%  |
| CARg(MADS)/PUER-Srf-ChIP-Seq(Sullivan et al.)/Homer                     | CCATATATGGNM         | 1.00E+00 | -6.25E-01 | 0.7824 | 49  | 1.96%  | 904.9   | 1.97%  |
| SpiB(ETS)/OCILY3-SPIB-ChIP-Seq(GSE56857)/Homer                          | AAAGRGGGAAGTG        | 1.00E+00 | -5.91E-01 | 0.7949 | 34  | 1.36%  | 632.5   | 1.38%  |
| THRa(NR)/C17.2-THRa-ChIP-Seq(GSE38347)/Homer                            | GGTCANYTGAGGWCA      | 1.00E+00 | -5.55E-01 | 0.8189 | 127 | 5.08%  | 2361.9  | 5.15%  |
| Fli1(ETS)/CD8-FLI-ChIP-Seq(GSE20898)/Homer                              | NRYTTCCGGH           | 1.00E+00 | -5.55E-01 | 0.8189 | 156 | 6.24%  | 2897.8  | 6.32%  |
| ERG(ETS)/VCaP-ERG-ChIP-Seq(GSE14097)/Homer                              | ACAGGAAGTG           | 1.00E+00 | -5.51E-01 | 0.8189 | 251 | 10.04% | 4651.5  | 10.14% |
| GRE(NR),IR3/A549-GR-ChIP-Seq(GSE32465)/Homer                            | NRGVACABNVGTGYCY     | 1.00E+00 | -4.86E-01 | 0.8635 | 18  | 0.72%  | 348     | 0.76%  |
| ETS(ETS)/Promoter/Homer                                                 | AACCGGAAGT           | 1.00E+00 | -4.62E-01 | 0.8803 | 36  | 1.44%  | 691.5   | 1.51%  |
| Nkx6.1(Homeobox)/Islet-Nkx6.1-ChIP-Seq(GSE40975)/Homer                  | GKTAATGR             | 1.00E+00 | -4.32E-01 | 0.9021 | 577 | 23.08% | 10726.4 | 23.39% |
| PAX5(Paired,Homeobox)/GM12878-PAX5-ChIP-Seq(GSE32465)/Homer             | GCAGCCAAGCRTGACH     | 1.00E+00 | -4.12E-01 | 0.9153 | 60  | 2.40%  | 1154.1  | 2.52%  |
| Znf263(Zf)/K562-Znf263-ChIP-Seq(GSE31477)/Homer                         | CVGTSCTCCC           | 1.00E+00 | -3.99E-01 | 0.9228 | 275 | 11.00% | 5166.2  | 11.26% |
| NFY(CCAAT)/Promoter/Homer                                               | RGCCAATSRG           | 1.00E+00 | -3.95E-01 | 0.9228 | 133 | 5.32%  | 2528    | 5.51%  |
| Pax7(Paired,Homeobox),long/Myoblast-Pax7-ChIP-Seq(GSE25064)/Homer       | TAATCHGATTAC         | 1.00E+00 | -3.86E-01 | 0.9253 | 4   | 0.16%  | 85.4    | 0.19%  |
| CHR(?)/Hela-CellCycle-Expression/Homer                                  | SRGTTTCAAA           | 1.00E+00 | -3.77E-01 | 0.9286 | 113 | 4.52%  | 2161    | 4.71%  |
| EWS:ERG-fusion(ETS)/CADO_ES1-EWS:ERG-ChIP-Seq(SRA014231)/Homer          | ATTTCTGTN            | 1.00E+00 | -3.68E-01 | 0.9325 | 119 | 4.76%  | 2276.8  | 4.96%  |

|                                                                  |                      |          |           |        |     |        |         |        |
|------------------------------------------------------------------|----------------------|----------|-----------|--------|-----|--------|---------|--------|
| Isl1(Homeobox)/Neuron-Isl1-ChIP-Seq(GSE31456)/Homer              | CTAATKGV             | 1.00E+00 | -3.65E-01 | 0.9325 | 370 | 14.80% | 6947.3  | 15.15% |
| NRF1(NRF)/MCF7-NRF1-ChIP-Seq(Unpublished)/Homer                  | CTGCGCATGCGC         | 1.00E+00 | -3.61E-01 | 0.9325 | 6   | 0.24%  | 128.6   | 0.28%  |
| T1ISRE(IRF)/ThioMac-Irfb-Expression/Homer                        | ACTTTCTTTCT          | 1.00E+00 | -3.59E-01 | 0.9325 | 1   | 0.04%  | 22      | 0.05%  |
| Arnt:Ahr(bHLH)/MCF7-Arnt-ChIP-Seq(Lo et al.)/Homer               | TBGCACGCAA           | 1.00E+00 | -3.54E-01 | 0.9325 | 82  | 3.28%  | 1586.3  | 3.46%  |
| Chop(bZIP)/MEF-Chop-ChIP-Seq(GSE35681)/Homer                     | ATTGCATCAT           | 1.00E+00 | -3.44E-01 | 0.9325 | 48  | 1.92%  | 945.2   | 2.06%  |
| PU.1(ETS)/ThioMac-PU.1-ChIP-Seq(GSE21512)/Homer                  | AGAGGAAGTG           | 1.00E+00 | -3.36E-01 | 0.9336 | 72  | 2.88%  | 1403.5  | 3.06%  |
| GFX(?)/Promoter/Homer                                            | ATTCTCGCGAGA         | 1.00E+00 | -3.36E-01 | 0.9336 | 1   | 0.04%  | 23.4    | 0.05%  |
| EHF(ETS)/LoVo-EHF-ChIP-Seq(GSE49402)/Homer                       | AVCAGGAAGT           | 1.00E+00 | -3.36E-01 | 0.9336 | 197 | 7.88%  | 3749.1  | 8.17%  |
| Pbx3(Homeobox)/GM12878-PBX3-ChIP-Seq(GSE32465)/Homer             | SCTGTCAATCAN         | 1.00E+00 | -3.28E-01 | 0.9336 | 37  | 1.48%  | 739.1   | 1.61%  |
| Tbx20(T-box)/Heart-Tbx20-ChIP-Seq(GSE29636)/Homer                | GGTGYTGACAGS         | 1.00E+00 | -3.28E-01 | 0.9336 | 37  | 1.48%  | 739.3   | 1.61%  |
| GLI3(Zf)/Limb-GLI3-ChIP-Chip(GSE11077)/Homer                     | CGTGGGTGGTCC         | 1.00E+00 | -2.93E-01 | 0.9465 | 14  | 0.56%  | 298     | 0.65%  |
| IRF2(IRF)/Erythroblas-IRF2-ChIP-Seq(GSE36985)/Homer              | GAAASYGAAASY         | 1.00E+00 | -2.93E-01 | 0.9465 | 14  | 0.56%  | 298.5   | 0.65%  |
| p53(p53)/Saos-p53-ChIP-Seq(GSE15780)/Homer                       | RRCATGYCYRGRCATGYYYN | 1.00E+00 | -2.93E-01 | 0.9465 | 12  | 0.48%  | 258.2   | 0.56%  |
| p53(p53)/Saos-p53-ChIP-Seq/Homer                                 | RRCATGYCYRGRCATGYYYN | 1.00E+00 | -2.93E-01 | 0.9465 | 12  | 0.48%  | 258.2   | 0.56%  |
| PRDM9(Zf)/Testis-DMC1-ChIP-Seq(GSE35498)/Homer                   | ADGGYAGYAGCATCT      | 1.00E+00 | -2.93E-01 | 0.9465 | 64  | 2.56%  | 1266.3  | 2.76%  |
| IRF1(IRF)/PBMC-IRF1-ChIP-Seq(GSE43036)/Homer                     | GAAAGTGAAAGT         | 1.00E+00 | -2.70E-01 | 0.9503 | 19  | 0.76%  | 402.3   | 0.88%  |
| EWS:FLI1-fusion(ETS)/SK_N_MC-EWS:FLI1-ChIP-Seq(SRA014231)/Homer  | VACAGGAAAT           | 1.00E+00 | -2.55E-01 | 0.9607 | 77  | 3.08%  | 1529.1  | 3.33%  |
| IRF4(IRF)/GM12878-IRF4-ChIP-Seq(GSE32465)/Homer                  | ACTGAAACCA           | 1.00E+00 | -2.41E-01 | 0.9699 | 75  | 3.00%  | 1497.8  | 3.27%  |
| ISRE(IRF)/ThioMac-LPS-Expression(GSE23622)/Homer                 | AGTTTCASTTTC         | 1.00E+00 | -2.32E-01 | 0.9732 | 8   | 0.32%  | 186.4   | 0.41%  |
| PRDM1(Zf)/Hela-PRDM1-ChIP-Seq(GSE31477)/Homer                    | ACTTTCACITTC         | 1.00E+00 | -2.21E-01 | 0.9797 | 88  | 3.52%  | 1755.4  | 3.83%  |
| AR-halfsite(NR)/LNCaP-AR-ChIP-Seq(GSE27824)/Homer                | CCAGGAACAG           | 1.00E+00 | -2.14E-01 | 0.982  | 725 | 29.00% | 13655.2 | 29.77% |
| PBX1(Homeobox)/MCF7-PBX1-ChIP-Seq(GSE28007)/Homer                | GSCTGTCACTCA         | 1.00E+00 | -2.10E-01 | 0.982  | 11  | 0.44%  | 253.8   | 0.55%  |
| n-Myc(bHLH)/mES-nMyc-ChIP-Seq(GSE11431)/Homer                    | VRCCACGTGG           | 1.00E+00 | -1.79E-01 | 1      | 89  | 3.56%  | 1798.1  | 3.92%  |
| Elk1(ETS)/Hela-Elk1-ChIP-Seq(GSE31477)/Homer                     | HACTTCCGGY           | 1.00E+00 | -1.63E-01 | 1      | 55  | 2.20%  | 1148.8  | 2.50%  |
| Oct2(POU,Homeobox)/Bcell-Oct2-ChIP-Seq(GSE21512)/Homer           | ATATGCAAAT           | 1.00E+00 | -1.62E-01 | 1      | 56  | 2.24%  | 1169    | 2.55%  |
| Oct4(POU,Homeobox)/mES-Oct4-ChIP-Seq(GSE11431)/Homer             | ATTTGCATAW           | 1.00E+00 | -1.59E-01 | 1      | 88  | 3.52%  | 1792    | 3.91%  |
| c-Myc(bHLH)/mES-cMyc-ChIP-Seq(GSE11431)/Homer                    | VVCCACGTGG           | 1.00E+00 | -1.51E-01 | 1      | 61  | 2.44%  | 1272.2  | 2.77%  |
| p53(p53)/mES-cMyc-ChIP-Seq(GSE11431)/Homer                       | ACATGCCCGGGCAT       | 1.00E+00 | -1.47E-01 | 1      | 2   | 0.08%  | 64.3    | 0.14%  |
| GABPA(ETS)/Jurkat-GABPa-ChIP-Seq(GSE17954)/Homer                 | RACCGGAAGT           | 1.00E+00 | -1.43E-01 | 1      | 118 | 4.72%  | 2381.9  | 5.19%  |
| HOXA2(Homeobox)/mES-Hoxa2-ChIP-Seq(Donaldson et al.)/Homer       | GYCATCMATCAT         | 1.00E+00 | -1.19E-01 | 1      | 14  | 0.56%  | 342.5   | 0.75%  |
| NRF(NRF)/Promoter/Homer                                          | STGCGCATGCGC         | 1.00E+00 | -1.02E-01 | 1      | 8   | 0.32%  | 217.5   | 0.47%  |
| ELF1(ETS)/Jurkat-ELF1-ChIP-Seq(SRA014231)/Homer                  | AVCCGGAAGT           | 1.00E+00 | -8.72E-02 | 1      | 49  | 1.96%  | 1079.1  | 2.35%  |
| Lhx2(Homeobox)/HFSC-Lhx2-ChIP-Seq(GSE48068)/Homer                | TAATTAGN             | 1.00E+00 | -5.63E-02 | 1      | 194 | 7.76%  | 3958.3  | 8.63%  |
| NFkB-p50,p52(RHD)/Monocyte-p50-ChIP-Chip(Schreiber et al.)/Homer | GGGGGAATCCCC         | 1.00E+00 | -5.46E-02 | 1      | 7   | 0.28%  | 215.3   | 0.47%  |
| E-box(bHLH)/Promoter/Homer                                       | SSGGTCACGTGA         | 1.00E+00 | -5.07E-02 | 1      | 6   | 0.24%  | 193.3   | 0.42%  |
| ETS1(ETS)/Jurkat-ETS1-ChIP-Seq(GSE17954)/Homer                   | ACAGGAAGTG           | 1.00E+00 | -4.51E-02 | 1      | 135 | 5.40%  | 2839.9  | 6.19%  |
| Max(bHLH)/K562-Max-ChIP-Seq(GSE31477)/Homer                      | RCCACGTGGYYN         | 1.00E+00 | -3.85E-02 | 1      | 86  | 3.44%  | 1886    | 4.11%  |
| bHLHE40(bHLH)/HepG2-BHLHE40-ChIP-Seq(GSE31477)/Homer             | KCACGTGMCN           | 1.00E+00 | -2.74E-02 | 1      | 30  | 1.20%  | 758.1   | 1.65%  |
| Pit1+1bp(Homeobox)/GCrat-Pit1-ChIP-Seq(GSE58009)/Homer           | ATGCATAATTCA         | 1.00E+00 | -2.65E-02 | 1      | 53  | 2.12%  | 1244.2  | 2.71%  |
| CRX(Homeobox)/Retina-Crx-ChIP-Seq(GSE20012)/Homer                | GCTAATCC             | 1.00E+00 | -2.44E-02 | 1      | 577 | 23.08% | 11353.9 | 24.76% |

|                                                                      |                      |          |           |   |     |        |         |        |
|----------------------------------------------------------------------|----------------------|----------|-----------|---|-----|--------|---------|--------|
| Gfi1b(Zf)/HPC7-Gfi1b-ChIP-Seq(GSE22178)/Homer                        | MAATCACTGC           | 1.00E+00 | -2.44E-02 | 1 | 141 | 5.64%  | 3019.7  | 6.58%  |
| Mouse_Recombination_Hotspot(Zf)/Testis-DMC1-ChIP-Seq(GSE24438)/Homer | ACTYKNATTCGTGNTACTTC | 1.00E+00 | -1.87E-02 | 1 | 5   | 0.20%  | 196.6   | 0.43%  |
| HNF6(Homeobox)/Liver-Hnf6-ChIP-Seq(ERP000394)/Homer                  | NTATYGATCH           | 1.00E+00 | -1.71E-02 | 1 | 94  | 3.76%  | 2113.9  | 4.61%  |
| PU.1-IRF(ETS:IRF)/Bcell-PU.1-ChIP-Seq(GSE21512)/Homer                | MGGAAGTGAAC          | 1.00E+00 | -7.67E-03 | 1 | 188 | 7.52%  | 4059.9  | 8.85%  |
| Ptf1a(bHLH)/Panc1-Ptf1a-ChIP-Seq(GSE47459)/Homer                     | ACAGCTGTTN           | 1.00E+00 | -7.34E-03 | 1 | 528 | 21.12% | 10613.3 | 23.14% |
| Tbet(T-box)/CD8-Tbet-ChIP-Seq(GSE33802)/Homer                        | AGGTGTGAAM           | 1.00E+00 | -6.62E-03 | 1 | 210 | 8.40%  | 4507.8  | 9.83%  |
| USF1(bHLH)/GM12878-Usf1-ChIP-Seq(GSE32465)/Homer                     | SGTCACGTGR           | 1.00E+00 | -6.09E-03 | 1 | 49  | 1.96%  | 1248.4  | 2.72%  |
| Usf2(bHLH)/C2C12-Usf2-ChIP-Seq(GSE36030)/Homer                       | GTCACGTGGT           | 1.00E+00 | -5.21E-03 | 1 | 45  | 1.80%  | 1170.3  | 2.55%  |
| CLOCK(bHLH)/Liver-Clock-ChIP-Seq(GSE39860)/Homer                     | GHCACGTG             | 1.00E+00 | -4.37E-03 | 1 | 63  | 2.52%  | 1566.9  | 3.42%  |
| Srebp1a(bHLH)/HepG2-Srebp1a-ChIP-Seq(GSE31477)/Homer                 | RTCACSCCAY           | 1.00E+00 | -2.58E-03 | 1 | 34  | 1.36%  | 961.1   | 2.10%  |
| E2A(bHLH)/proBcell-E2A-ChIP-Seq(GSE21978)/Homer                      | DNRCAGCTGY           | 1.00E+00 | -2.57E-03 | 1 | 277 | 11.08% | 5917.9  | 12.90% |
| c-Myc(bHLH)/LNCAP-cMyc-ChIP-Seq(Unpublished)/Homer                   | VCCACGTG             | 1.00E+00 | -1.09E-03 | 1 | 33  | 1.32%  | 976.3   | 2.13%  |
| Srebp2(bHLH)/HepG2-Srebp2-ChIP-Seq(GSE31477)/Homer                   | CGGTCACSCCAC         | 1.00E+00 | -5.63E-04 | 1 | 21  | 0.84%  | 716.3   | 1.56%  |
| NPAS2(bHLH)/Liver-NPAS2-ChIP-Seq(GSE39860)/Homer                     | KCCACGTGAC           | 1.00E+00 | -5.07E-04 | 1 | 175 | 7.00%  | 4029.7  | 8.79%  |
| LXRE(NR),DR4/RAW-LXRb.biotin-ChIP-Seq(GSE21512)/Homer                | RGTTACTANAGGTCA      | 1.00E+00 | -2.59E-04 | 1 | 27  | 1.08%  | 891.5   | 1.94%  |
| Nkx3.1(Homeobox)/LNCaP-Nkx3.1-ChIP-Seq(GSE28264)/Homer               | AAGCACTTAA           | 1.00E+00 | -2.14E-04 | 1 | 444 | 17.76% | 9420.3  | 20.54% |
| Pitx1(Homeobox)/Chicken-Pitx1-ChIP-Seq(GSE38910)/Homer               | TAATCCCN             | 1.00E+00 | -1.14E-04 | 1 | 950 | 38.00% | 19078.1 | 41.60% |
| E2A(bHLH),near_PU.1/Bcell-PU.1-ChIP-Seq(GSE21512)/Homer              | NVCACCTGBN           | 1.00E+00 | -5.60E-05 | 1 | 283 | 11.32% | 6377    | 13.90% |
| BMAL1(bHLH)/Liver-Bmal1-ChIP-Seq(GSE39860)/Homer                     | GNCACGTG             | 1.00E+00 | -1.20E-05 | 1 | 279 | 11.16% | 6412.2  | 13.98% |
| GSC(Homeobox)/FrogEmbryos-GSC-ChIP-Seq(DRA000576)/Homer              | RGGATTAR             | 1.00E+00 | -9.00E-06 | 1 | 321 | 12.84% | 7281.1  | 15.88% |
| Nkx2.1(Homeobox)/LungAC-Nkx2.1-ChIP-Seq(GSE43252)/Homer              | RSCACTYRAG           | 1.00E+00 | -1.00E-06 | 1 | 507 | 20.28% | 11162.8 | 24.34% |
| Nkx2.5(Homeobox)/HL1-Nkx2.5.biotin-ChIP-Seq(GSE21529)/Homer          | RRSCACTYAA           | 1.00E+00 | -1.00E-06 | 1 | 381 | 15.24% | 8691.2  | 18.95% |
| Eomes(T-box)/H9-Eomes-ChIP-Seq(GSE26097)/Homer                       | ATTAACACCT           | 1.00E+00 | 0.00E+00  | 1 | 373 | 14.92% | 8586.6  | 18.72% |
| Tbx5(T-box)/HL1-Tbx5.biotin-ChIP-Seq(GSE21529)/Homer                 | AGGTGTCA             | 1.00E+00 | 0.00E+00  | 1 | 653 | 26.12% | 14333.2 | 31.25% |
| Mef2a(MADS)/HL1-Mef2a.biotin-ChIP-Seq(GSE21529)/Homer                | CYAAAAATAG           | 1.00E+00 | 0.00E+00  | 1 | 64  | 2.56%  | 2261.1  | 4.93%  |
| Mef2c(MADS)/GM12878-Mef2c-ChIP-Seq(GSE32465)/Homer                   | DCYAAAAATAGM         | 1.00E+00 | 0.00E+00  | 1 | 66  | 2.64%  | 2469.2  | 5.38%  |
| REST-NRSF(Zf)/Jurkat-NRSF-ChIP-Seq/Homer                             | GGMGCTGTCCATGGTGCTGA | 1.00E+00 | 0.00E+00  | 1 | 0   | 0.00%  | 5.3     | 0.01%  |
| CTCF-SatelliteElement(Zf?)/CD4+-CTCF-ChIP-Seq(Barski et al.)/Homer   | TGCAGTTCMVNVRTGGCCA  | 1.00E+00 | 0.00E+00  | 1 | 0   | 0.00%  | 27.8    | 0.06%  |
