# Supplementary material
Source: PubMed Central journal article supplement (PMC5415638)
Supplement: onc2016382x6.pdf [file onc2016382x6.pdf]

| Gene     | Normalised Expression |       |       |          |       |       |         |       |       |          |       |     | Mean Expression Difference |      |       |       |
|----------|-----------------------|-------|-------|----------|-------|-------|---------|-------|-------|----------|-------|-----|----------------------------|------|-------|-------|
|          | MCF7                  |       |       | MCF7     |       |       | Y537S   |       |       | Y537S    |       |     | MCF7                       | MCF7 | Y537S | Y537S |
|          | Vehicle               |       |       | Estrogen |       |       | Vehicle |       |       | Estrogen |       |     | Veh                        | E2   | Veh   | E2    |
|          | 1                     | 2     | 3     | 1        | 2     | 3     | 1       | 2     | 3     | 1        | 2     | 3   |                            |      |       |       |
| TBC1D14  | 2226                  | 2245  | 2212  | 2623     | 2510  | 2501  | 2677    | 2712  | 2770  | 2752     | 2836  | 1.0 | 1.1                        | 1.2  | 1.3   |       |
| GPD1L    | 1138                  | 1141  | 1053  | 1511     | 1537  | 1460  | 1723    | 1725  | 1792  | 1774     | 2019  | 1.0 | 1.4                        | 1.6  | 1.7   |       |
| ORC3     | 620                   | 634   | 634   | 789      | 770   | 750   | 896     | 912   | 865   | 894      | 987   | 1.0 | 1.2                        | 1.4  | 1.5   |       |
| PCNT     | 2571                  | 2620  | 2593  | 3050     | 3007  | 2986  | 3465    | 3318  | 3610  | 3302     | 3561  | 1.0 | 1.2                        | 1.3  | 1.3   |       |
| TMEM123  | 5356                  | 5342  | 5329  | 5855     | 6087  | 6050  | 6488    | 6558  | 6406  | 6659     | 6857  | 1.0 | 1.1                        | 1.2  | 1.3   |       |
| MCM4     | 3742                  | 3823  | 3795  | 5022     | 5079  | 5043  | 6880    | 6649  | 6858  | 7421     | 7709  | 1.0 | 1.3                        | 1.8  | 2.0   |       |
| UNG      | 1528                  | 1710  | 1533  | 2644     | 2605  | 2614  | 4234    | 4265  | 4189  | 5312     | 5333  | 1.0 | 1.6                        | 2.7  | 3.3   |       |
| FAM198B  | 780                   | 843   | 791   | 1215     | 1292  | 1313  | 2133    | 2120  | 1956  | 2458     | 2396  | 1.0 | 1.6                        | 2.6  | 3.0   |       |
| IFITM10  | 97                    | 108   | 103   | 347      | 318   | 370   | 1056    | 1125  | 1040  | 1414     | 1447  | 1.0 | 3.4                        | 10.4 | 13.9  |       |
| C6orf211 | 2235                  | 2295  | 2259  | 3364     | 3488  | 3302  | 5282    | 5609  | 5275  | 5750     | 6286  | 1.0 | 1.5                        | 2.4  | 2.7   |       |
| CTSC     | 201                   | 211   | 194   | 316      | 378   | 317   | 611     | 619   | 566   | 729      | 731   | 1.0 | 1.7                        | 3.0  | 3.6   |       |
| A4GALT   | 132                   | 148   | 132   | 407      | 315   | 328   | 612     | 574   | 607   | 858      | 835   | 1.0 | 2.6                        | 4.4  | 6.2   |       |
| ASB13    | 657                   | 654   | 633   | 1156     | 1058  | 1057  | 1425    | 1431  | 1545  | 1683     | 1711  | 1.0 | 1.7                        | 2.3  | 2.6   |       |
| ELOVL6   | 1067                  | 1104  | 1025  | 1790     | 1801  | 1748  | 2265    | 2458  | 2244  | 2754     | 2755  | 1.0 | 1.7                        | 2.2  | 2.6   |       |
| ANAPC13  | 1395                  | 1540  | 1405  | 1851     | 1753  | 1768  | 2058    | 2180  | 2159  | 2295     | 2269  | 1.0 | 1.2                        | 1.5  | 1.6   |       |
| LMNB1    | 2762                  | 3003  | 2841  | 4005     | 3828  | 3764  | 4979    | 4836  | 5151  | 5312     | 5449  | 1.0 | 1.3                        | 1.7  | 1.9   |       |
| MCM2     | 1958                  | 2017  | 1934  | 3716     | 3533  | 3446  | 5665    | 5423  | 5546  | 6561     | 6416  | 1.0 | 1.8                        | 2.8  | 3.3   |       |
| CDT1     | 931                   | 938   | 929   | 1415     | 1325  | 1306  | 1912    | 1894  | 1938  | 2077     | 2061  | 1.0 | 1.4                        | 2.1  | 2.2   |       |
| ESR1     | 2652                  | 2716  | 2684  | 3312     | 3232  | 3192  | 3652    | 3730  | 3823  | 3749     | 3851  | 1.0 | 1.2                        | 1.4  | 1.4   |       |
| MEPCE    | 4450                  | 4513  | 4339  | 4951     | 5083  | 5087  | 5537    | 5433  | 5727  | 5893     | 5789  | 1.0 | 1.1                        | 1.3  | 1.3   |       |
| C16orf74 | 272                   | 275   | 237   | 373      | 393   | 390   | 490     | 472   | 490   | 553      | 515   | 1.0 | 1.5                        | 1.9  | 2.0   |       |
| GALNT7   | 1115                  | 1205  | 1201  | 1297     | 1468  | 1378  | 1494    | 1524  | 1470  | 1548     | 1671  | 1.0 | 1.2                        | 1.3  | 1.4   |       |
| CYB5D1   | 416                   | 474   | 468   | 536      | 583   | 609   | 641     | 632   | 690   | 734      | 690   | 1.0 | 1.3                        | 1.4  | 1.6   |       |
| UBE4B    | 1637                  | 1763  | 1768  | 2182     | 2268  | 2197  | 2392    | 2651  | 2681  | 2914     | 2937  | 1.0 | 1.3                        | 1.5  | 1.7   |       |
| FAM162A  | 754                   | 825   | 722   | 891      | 951   | 912   | 1164    | 1241  | 1037  | 1178     | 1275  | 1.0 | 1.2                        | 1.5  | 1.6   |       |
| ABHD17C  | 1989                  | 2009  | 1866  | 2254     | 2373  | 2318  | 2706    | 2763  | 2544  | 3026     | 3099  | 1.0 | 1.2                        | 1.4  | 1.6   |       |
| CHPT1    | 363                   | 366   | 325   | 421      | 509   | 436   | 616     | 668   | 550   | 701      | 692   | 1.0 | 1.3                        | 1.7  | 2.0   |       |
| MRPL16   | 931                   | 937   | 895   | 1073     | 1136  | 1128  | 1353    | 1229  | 1159  | 1269     | 1301  | 1.0 | 1.2                        | 1.4  | 1.4   |       |
| RBM8A    | 8518                  | 8945  | 8389  | 9002     | 9358  | 9350  | 9487    | 9958  | 9847  | 10012    | 9829  | 1.0 | 1.1                        | 1.1  | 1.2   |       |
| RPL14    | 7966                  | 8096  | 7826  | 8325     | 8668  | 9230  | 9296    | 9338  | 9275  | 9197     | 9381  | 1.0 | 1.1                        | 1.2  | 1.2   |       |
| SLC19A2  | 720                   | 654   | 625   | 927      | 928   | 906   | 963     | 1037  | 903   | 1011     | 1159  | 1.0 | 1.4                        | 1.5  | 1.6   |       |
| UMPS     | 1989                  | 1811  | 1913  | 2340     | 2432  | 2246  | 2340    | 2601  | 2363  | 2582     | 2724  | 1.0 | 1.2                        | 1.3  | 1.4   |       |
| EBPL     | 506                   | 441   | 474   | 610      | 642   | 616   | 731     | 797   | 660   | 729      | 780   | 1.0 | 1.3                        | 1.5  | 1.6   |       |
| RPRD2    | 2541                  | 2403  | 2594  | 3072     | 3038  | 2962  | 3531    | 3553  | 3640  | 3515     | 3750  | 1.0 | 1.2                        | 1.4  | 1.4   |       |
| ZNF488   | 32                    | 23    | 37    | 95       | 91    | 83    | 154     | 147   | 171   | 170      | 260   | 1.0 | 2.9                        | 5.1  | 7.0   |       |
| TMEM229B | 153                   | 98    | 172   | 294      | 261   | 258   | 445     | 428   | 467   | 538      | 533   | 1.0 | 1.9                        | 3.2  | 3.8   |       |
| OPA1     | 2938                  | 2833  | 2886  | 3152     | 3236  | 3121  | 3430    | 3356  | 3499  | 3496     | 3680  | 1.0 | 1.1                        | 1.2  | 1.2   |       |
| DDX20    | 849                   | 732   | 788   | 957      | 1065  | 914   | 1222    | 1041  | 1147  | 1223     | 1271  | 1.0 | 1.2                        | 1.4  | 1.6   |       |
| WBP11    | 3455                  | 3166  | 3298  | 4060     | 3946  | 4094  | 4677    | 4484  | 4699  | 5102     | 5183  | 1.0 | 1.2                        | 1.4  | 1.6   |       |
| CEP85    | 320                   | 279   | 276   | 417      | 380   | 396   | 494     | 521   | 515   | 668      | 678   | 1.0 | 1.4                        | 1.7  | 2.3   |       |
| MLKL     | 148                   | 98    | 107   | 194      | 217   | 187   | 227     | 249   | 292   | 379      | 351   | 1.0 | 1.7                        | 2.2  | 3.1   |       |
| XRCC3    | 1615                  | 1390  | 1534  | 1713     | 1799  | 1733  | 1979    | 2043  | 2066  | 2293     | 2280  | 1.0 | 1.2                        | 1.3  | 1.5   |       |
| GPI      | 8507                  | 8413  | 8480  | 9426     | 9072  | 9383  | 9308    | 9831  | 9434  | 10059    | 9998  | 1.0 | 1.1                        | 1.1  | 1.2   |       |
| TMEM109  | 2926                  | 2814  | 2934  | 3730     | 3585  | 3773  | 3862    | 4181  | 4093  | 4465     | 4689  | 1.0 | 1.3                        | 1.4  | 1.6   |       |
| GINS3    | 153                   | 173   | 159   | 283      | 260   | 288   | 318     | 379   | 286   | 429      | 442   | 1.0 | 1.7                        | 2.0  | 2.7   |       |
| FOS      | 403                   | 466   | 429   | 614      | 552   | 646   | 618     | 687   | 671   | 837      | 843   | 1.0 | 1.4                        | 1.5  | 1.9   |       |
| KCNK6    | 915                   | 939   | 957   | 1120     | 1165  | 1228  | 1182    | 1316  | 1159  | 1569     | 1483  | 1.0 | 1.2                        | 1.3  | 1.6   |       |
| TMA16    | 694                   | 730   | 692   | 874      | 934   | 910   | 973     | 1006  | 885   | 1228     | 1161  | 1.0 | 1.3                        | 1.4  | 1.7   |       |
| CDC123   | 1909                  | 1989  | 1941  | 2243     | 2252  | 2336  | 2495    | 2456  | 2441  | 2773     | 2899  | 1.0 | 1.2                        | 1.3  | 1.5   |       |
| FAM60A   | 1967                  | 1960  | 1907  | 2111     | 2143  | 2316  | 2442    | 2384  | 2352  | 2472     | 2699  | 1.0 | 1.1                        | 1.2  | 1.3   |       |
| EMG1     | 1048                  | 1155  | 1060  | 1270     | 1264  | 1327  | 1314    | 1376  | 1289  | 1357     | 1557  | 1.0 | 1.2                        | 1.2  | 1.3   |       |
| R3HDM1   | 2180                  | 1969  | 2124  | 2616     | 2630  | 2503  | 2556    | 2599  | 2615  | 2801     | 3067  | 1.0 | 1.2                        | 1.2  | 1.4   |       |
| MTIF2    | 1158                  | 1072  | 1113  | 1386     | 1379  | 1332  | 1464    | 1346  | 1352  | 1517     | 1630  | 1.0 | 1.2                        | 1.2  | 1.4   |       |
| NUP155   | 1926                  | 1821  | 1936  | 2340     | 2472  | 2429  | 2504    | 2382  | 2498  | 2555     | 2869  | 1.0 | 1.3                        | 1.3  | 1.4   |       |
| PGAM1    | 12733                 | 12397 | 12418 | 13270    | 13420 | 13160 | 13331   | 13335 | 13068 | 13711    | 14213 | 1.0 | 1.1                        | 1.1  | 1.1   |       |
| PDIA6    | 13335                 | 13224 | 12731 | 13778    | 13780 | 14156 | 14626   | 14514 | 14161 | 15574    | 15619 | 1.0 | 1.1                        | 1.1  | 1.2   |       |
| ERLIN2   | 1402                  | 1446  | 1259  | 1549     | 1667  | 1731  | 1898    | 1834  | 1720  | 2247     | 2195  | 1.0 | 1.2                        | 1.3  | 1.6   |       |
| DHX57    | 1423                  | 1453  | 1341  | 1599     | 1714  | 1700  | 2015    | 1956  | 1835  | 2936     | 3182  | 1.0 | 1.2                        | 1.4  | 2.2   |       |
| SLC25A24 | 5014                  | 5058  | 4795  | 5480     | 5585  | 5870  | 6508    | 6482  | 6190  | 7972     | 7960  | 1.0 | 1.1                        | 1.3  | 1.6   |       |
| CD47     | 5262                  | 5097  | 4935  | 5622     | 5433  | 5681  | 5920    | 5954  | 5829  | 6503     | 6877  | 1.0 | 1.1                        | 1.2  | 1.3   |       |
| KCNF1    | 667                   | 675   | 647   | 805      | 769   | 868   | 904     | 1069  | 925   | 1396     | 1295  | 1.0 | 1.2                        | 1.5  | 2.0   |       |
| SLC1A5   | 10624                 | 10463 | 10391 | 11334    | 11449 | 11403 | 12260   | 12339 | 12306 | 13608    | 13343 | 1.0 | 1.1                        | 1.2  | 1.3   |       |

|              |            |            |            |              |              |             |              |              |              |              |              |            |             |             |             |
|--------------|------------|------------|------------|--------------|--------------|-------------|--------------|--------------|--------------|--------------|--------------|------------|-------------|-------------|-------------|
| DAP3         | 3318       | 3264       | 3190       | 3584         | 3692         | 3533        | 3883         | 3966         | 3842         | 4335         | 4362         | 1.0        | 1.1         | 1.2         | 1.3         |
| ADCY1        | 1026       | 1000       | 1047       | 1388         | 1394         | 1359        | 1639         | 1704         | 1627         | 2350         | 2382         | 1.0        | 1.3         | 1.6         | 2.3         |
| DOK7         | 582        | 589        | 591        | 1175         | 1082         | 1155        | 1658         | 1736         | 1640         | 2978         | 2800         | 1.0        | 1.9         | 2.9         | 4.9         |
| RFWD3        | 2795       | 2719       | 2748       | 3257         | 3189         | 3140        | 3598         | 3563         | 3522         | 4201         | 4037         | 1.0        | 1.2         | 1.3         | 1.5         |
| TPBG         | 5169       | 5531       | 5655       | 6604         | 6173         | 6500        | 7734         | 8001         | 7374         | 9968         | 10114        | 1.0        | 1.2         | 1.4         | 1.8         |
| NT5DC3       | 318        | 310        | 325        | 450          | 445          | 436         | 550          | 619          | 537          | 790          | 829          | 1.0        | 1.4         | 1.8         | 2.5         |
| PLOD2        | 7736       | 7754       | 7699       | 10156        | 10601        | 10081       | 13543        | 14439        | 12953        | 17856        | 18762        | 1.0        | 1.3         | 1.8         | 2.4         |
| KCTD3        | 3568       | 3624       | 3552       | 4114         | 3921         | 3953        | 4365         | 4472         | 4258         | 4774         | 4865         | 1.0        | 1.1         | 1.2         | 1.3         |
| C16orf13     | 1006       | 1070       | 1049       | 1227         | 1165         | 1283        | 1286         | 1221         | 1244         | 1373         | 1406         | 1.0        | 1.2         | 1.2         | 1.3         |
| MRPL17       | 1150       | 1233       | 1238       | 1434         | 1409         | 1476        | 1518         | 1488         | 1452         | 1703         | 1730         | 1.0        | 1.2         | 1.2         | 1.4         |
| GEMIN6       | 284        | 346        | 301        | 417          | 408          | 416         | 498          | 405          | 441          | 562          | 527          | 1.0        | 1.3         | 1.4         | 1.8         |
| GLRX5        | 2721       | 2963       | 2723       | 3104         | 3130         | 3165        | 3253         | 3261         | 3354         | 3552         | 3420         | 1.0        | 1.1         | 1.2         | 1.2         |
| TMEM147      | 1916       | 2169       | 1938       | 2361         | 2313         | 2312        | 2417         | 2354         | 2412         | 2684         | 2561         | 1.0        | 1.2         | 1.2         | 1.3         |
| ALDH18A1     | 3705       | 3901       | 3789       | 4190         | 4173         | 4234        | 4276         | 4258         | 4286         | 4636         | 4497         | 1.0        | 1.1         | 1.1         | 1.2         |
| HNRNPA1      | 31108      | 32466      | 31246      | 35070        | 34429        | 35388       | 36450        | 35918        | 37180        | 37412        | 36687        | 1.0        | 1.1         | 1.2         | 1.2         |
| THNSL1       | 456        | 455        | 436        | 687          | 699          | 715         | 937          | 760          | 849          | 980          | 892          | 1.0        | 1.6         | 1.9         | 2.1         |
| THYN1        | 155        | 189        | 149        | 246          | 232          | 237         | 362          | 309          | 303          | 379          | 348          | 1.0        | 1.5         | 2.0         | 2.2         |
| ST7          | 341        | 418        | 353        | 470          | 475          | 509         | 567          | 547          | 540          | 601          | 613          | 1.0        | 1.3         | 1.5         | 1.6         |
| PRMT7        | 579        | 646        | 658        | 865          | 729          | 833         | 946          | 924          | 834          | 965          | 950          | 1.0        | 1.3         | 1.4         | 1.5         |
| LRRC45       | 694        | 755        | 749        | 944          | 822          | 925         | 987          | 961          | 948          | 1112         | 1010         | 1.0        | 1.2         | 1.3         | 1.4         |
| CACYBP       | 4438       | 4400       | 4160       | 4821         | 4849         | 4919        | 4912         | 5103         | 4800         | 5270         | 5325         | 1.0        | 1.1         | 1.1         | 1.2         |
| C21orf33     | 3580       | 3634       | 3574       | 3956         | 3923         | 3913        | 3930         | 4037         | 3796         | 4049         | 4074         | 1.0        | 1.1         | 1.1         | 1.1         |
| SEPHS2       | 4289       | 4543       | 4147       | 4849         | 4663         | 4683        | 4847         | 4900         | 4719         | 5091         | 5122         | 1.0        | 1.1         | 1.1         | 1.2         |
| TSPAN31      | 3218       | 3168       | 3106       | 4024         | 3633         | 3808        | 4072         | 3886         | 3840         | 4419         | 4395         | 1.0        | 1.2         | 1.2         | 1.4         |
| WDR75        | 1170       | 1150       | 1074       | 1479         | 1400         | 1358        | 1500         | 1481         | 1489         | 1592         | 1726         | 1.0        | 1.2         | 1.3         | 1.5         |
| THEM4        | 247        | 257        | 264        | 328          | 328          | 369         | 381          | 331          | 350          | 361          | 387          | 1.0        | 1.3         | 1.4         | 1.5         |
| PPA1         | 4135       | 4251       | 4055       | 4479         | 4509         | 4647        | 4722         | 4523         | 4696         | 4652         | 4857         | 1.0        | 1.1         | 1.1         | 1.1         |
| PPIL1        | 1130       | 1035       | 1052       | 1295         | 1350         | 1369        | 1352         | 1297         | 1279         | 1498         | 1478         | 1.0        | 1.2         | 1.2         | 1.4         |
| RPL7L1       | 3824       | 3705       | 3633       | 4066         | 4172         | 4271        | 4273         | 4187         | 4068         | 4391         | 4358         | 1.0        | 1.1         | 1.1         | 1.2         |
| MLH3         | 679        | 628        | 645        | 777          | 830          | 863         | 898          | 866          | 831          | 933          | 898          | 1.0        | 1.3         | 1.3         | 1.4         |
| LZIC         | 514        | 454        | 460        | 593          | 569          | 682         | 743          | 646          | 611          | 743          | 753          | 1.0        | 1.3         | 1.4         | 1.6         |
| CLNS1A       | 2613       | 2533       | 2371       | 2705         | 2781         | 2936        | 3123         | 2847         | 2836         | 3207         | 3209         | 1.0        | 1.1         | 1.2         | 1.3         |
| CHD1L        | 1900       | 1821       | 1814       | 2063         | 2084         | 2189        | 2245         | 1989         | 2057         | 2291         | 2265         | 1.0        | 1.1         | 1.1         | 1.2         |
| ANGEL1       | 1459       | 1309       | 1366       | 1645         | 1620         | 1646        | 1735         | 1645         | 1644         | 1753         | 1614         | 1.0        | 1.2         | 1.2         | 1.2         |
| SNRPA        | 1572       | 1528       | 1428       | 1775         | 1685         | 1805        | 1982         | 1842         | 1917         | 2153         | 1869         | 1.0        | 1.2         | 1.3         | 1.3         |
| ATP5G1       | 1171       | 1082       | 1173       | 1333         | 1285         | 1338        | 1405         | 1350         | 1484         | 1498         | 1410         | 1.0        | 1.2         | 1.2         | 1.3         |
| PBX1         | 1901       | 1954       | 1906       | 2595         | 2449         | 2543        | 2877         | 2582         | 2831         | 2741         | 2712         | 1.0        | 1.3         | 1.4         | 1.4         |
| MTPAP        | 916        | 915        | 911        | 1102         | 1094         | 1133        | 1291         | 1207         | 1231         | 1218         | 1249         | 1.0        | 1.2         | 1.4         | 1.3         |
| SCIN         | 2997       | 2908       | 2953       | 4009         | 3854         | 3845        | 4821         | 4575         | 4605         | 4525         | 4330         | 1.0        | 1.3         | 1.6         | 1.5         |
| COX15        | 838        | 807        | 857        | 1003         | 1061         | 960         | 1190         | 1128         | 1128         | 1165         | 1078         | 1.0        | 1.2         | 1.4         | 1.3         |
| CABLES1      | 1679       | 1569       | 1572       | 2051         | 1826         | 1953        | 2120         | 2253         | 2135         | 2104         | 2072         | 1.0        | 1.2         | 1.4         | 1.3         |
| FAM189B      | 977        | 926        | 956        | 1246         | 1121         | 1153        | 1277         | 1345         | 1228         | 1334         | 1348         | 1.0        | 1.2         | 1.3         | 1.4         |
| TMED10       | 10610      | 10304      | 10279      | 11258        | 11017        | 10892       | 11452        | 11566        | 11402        | 11517        | 11538        | 1.0        | 1.1         | 1.1         | 1.1         |
| LDLRAD3      | 749        | 728        | 801        | 980          | 948          | 1032        | 986          | 976          | 978          | 1105         | 1249         | 1.0        | 1.3         | 1.3         | 1.5         |
| HSPA14       | 1315       | 1378       | 1347       | 1540         | 1604         | 1597        | 1597         | 1576         | 1555         | 1694         | 1799         | 1.0        | 1.2         | 1.2         | 1.3         |
| CCDC138      | 127        | 141        | 149        | 206          | 222          | 214         | 228          | 234          | 241          | 264          | 315          | 1.0        | 1.5         | 1.7         | 2.1         |
| INO80B       | 486        | 513        | 538        | 677          | 655          | 667         | 704          | 715          | 683          | 702          | 803          | 1.0        | 1.3         | 1.4         | 1.5         |
| PFKM         | 1052       | 1094       | 1185       | 1606         | 1532         | 1613        | 1582         | 1692         | 1499         | 1775         | 1990         | 1.0        | 1.4         | 1.4         | 1.7         |
| TIPIN        | 156        | 175        | 201        | 263          | 263          | 269         | 265          | 270          | 248          | 346          | 323          | 1.0        | 1.5         | 1.5         | 1.9         |
| REPIN1       | 3988       | 4197       | 4225       | 4759         | 4585         | 4674        | 4597         | 4807         | 4739         | 5085         | 5020         | 1.0        | 1.1         | 1.1         | 1.2         |
| TTF2         | 1177       | 1157       | 1105       | 1610         | 1524         | 1476        | 1865         | 1670         | 1663         | 1997         | 1910         | 1.0        | 1.3         | 1.5         | 1.7         |
| E2F2         | 75         | 71         | 63         | 160          | 146          | 124         | 191          | 206          | 173          | 278          | 253          | 1.0        | 2.1         | 2.7         | 3.8         |
| LYPD6        | 518        | 447        | 426        | 632          | 660          | 571         | 749          | 693          | 666          | 820          | 809          | 1.0        | 1.3         | 1.5         | 1.8         |
| DYNC2H1      | 107        | 110        | 90         | 150          | 175          | 150         | 185          | 176          | 187          | 214          | 227          | 1.0        | 1.5         | 1.8         | 2.2         |
| TXNRD3       | 352        | 330        | 315        | 447          | 443          | 418         | 483          | 456          | 509          | 525          | 524          | 1.0        | 1.3         | 1.5         | 1.6         |
| POLR3K       | 1098       | 1065       | 974        | 1296         | 1359         | 1309        | 1412         | 1315         | 1426         | 1506         | 1467         | 1.0        | 1.3         | 1.3         | 1.4         |
| EPS15L1      | 1311       | 1316       | 1327       | 2449         | 2432         | 2386        | 2468         | 2390         | 2588         | 3249         | 3259         | 1.0        | 1.8         | 1.9         | 2.5         |
| SLC29A1      | 601        | 590        | 664        | 1263         | 1182         | 1201        | 1295         | 1221         | 1297         | 1802         | 1644         | 1.0        | 2.0         | 2.1         | 2.8         |
| <b>GREB1</b> | <b>637</b> | <b>743</b> | <b>753</b> | <b>10398</b> | <b>10077</b> | <b>9437</b> | <b>16212</b> | <b>16529</b> | <b>16182</b> | <b>44266</b> | <b>43856</b> | <b>1.0</b> | <b>14.0</b> | <b>22.9</b> | <b>62.0</b> |
| NPY1R        | 51         | 45         | 40         | 481          | 380          | 469         | 601          | 599          | 702          | 1652         | 1632         | 1.0        | 9.8         | 14.0        | 36.3        |
| EMP2         | 10447      | 10754      | 10809      | 19195        | 18436        | 18919       | 21267        | 20782        | 22195        | 28197        | 28071        | 1.0        | 1.8         | 2.0         | 2.6         |
| FIA          | 269        | 311        | 294        | 504          | 497          | 512         | 518          | 527          | 577          | 679          | 633          | 1.0        | 1.7         | 1.9         | 2.3         |
| PTCD3        | 1546       | 1559       | 1529       | 1948         | 1992         | 1992        | 2099         | 1965         | 2050         | 2252         | 2171         | 1.0        | 1.3         | 1.3         | 1.4         |
| CDCA7        | 162        | 170        | 226        | 494          | 542          | 498         | 540          | 538          | 516          | 714          | 784          | 1.0        | 2.8         | 2.9         | 4.0         |
| C19orf48     | 1935       | 1903       | 2010       | 2758         | 2639         | 2863        | 2938         | 2773         | 2779         | 3039         | 3105         | 1.0        | 1.4         | 1.5         | 1.6         |
| ALKBH2       | 537        | 553        | 554        | 745          | 727          | 780         | 780          | 756          | 730          | 840          | 896          | 1.0        | 1.4         | 1.4         | 1.6         |

|              |             |             |             |              |              |              |              |              |              |              |              |            |            |             |             |
|--------------|-------------|-------------|-------------|--------------|--------------|--------------|--------------|--------------|--------------|--------------|--------------|------------|------------|-------------|-------------|
| PODXL2       | 1934        | 2000        | 2023        | 2652         | 2552         | 2736         | 2894         | 2848         | 2803         | 3041         | 2828         | 1.0        | 1.3        | 1.4         | 1.5         |
| IRS1         | 8290        | 8537        | 8533        | 11416        | 11251        | 11029        | 11285        | 11904        | 11382        | 12546        | 11890        | 1.0        | 1.3        | 1.4         | 1.4         |
| DHRS2        | 936         | 1023        | 908         | 1607         | 1598         | 1614         | 1829         | 1764         | 1807         | 1969         | 2069         | 1.0        | 1.7        | 1.9         | 2.1         |
| <b>TFF1</b>  | <b>3877</b> | <b>3865</b> | <b>3866</b> | <b>26053</b> | <b>24771</b> | <b>24606</b> | <b>42563</b> | <b>51429</b> | <b>41678</b> | <b>63939</b> | <b>64727</b> | <b>1.0</b> | <b>6.5</b> | <b>11.7</b> | <b>16.6</b> |
| PAPSS2       | 4607        | 4677        | 4507        | 6162         | 6139         | 6243         | 6869         | 7033         | 6793         | 7251         | 7220         | 1.0        | 1.3        | 1.5         | 1.6         |
| DSCAM-AS1    | 4101        | 3924        | 3852        | 7204         | 6386         | 6682         | 7033         | 7153         | 6875         | 8737         | 8732         | 1.0        | 1.7        | 1.8         | 2.2         |
| TET2         | 1741        | 1648        | 1723        | 5066         | 4736         | 4669         | 4767         | 4584         | 4991         | 6972         | 7021         | 1.0        | 2.8        | 2.8         | 4.1         |
| C5AR2        | 25          | 13          | 21          | 310          | 304          | 290          | 289          | 294          | 360          | 638          | 677          | 1.0        | 15.3       | 15.9        | 33.3        |
| KCNK5        | 142         | 153         | 126         | 466          | 417          | 489          | 421          | 449          | 443          | 602          | 603          | 1.0        | 3.3        | 3.1         | 4.3         |
| MYB          | 80          | 107         | 73          | 456          | 465          | 485          | 535          | 489          | 465          | 846          | 896          | 1.0        | 5.4        | 5.7         | 10.0        |
| CMSS1        | 627         | 640         | 591         | 985          | 993          | 1009         | 1116         | 1002         | 1028         | 1291         | 1412         | 1.0        | 1.6        | 1.7         | 2.2         |
| PAICS        | 4808        | 4602        | 4472        | 6802         | 6935         | 6801         | 6883         | 6690         | 6970         | 8523         | 8542         | 1.0        | 1.5        | 1.5         | 1.8         |
| RAB31        | 2037        | 1930        | 2037        | 3843         | 3957         | 3961         | 4098         | 3990         | 3774         | 5850         | 5977         | 1.0        | 2.0        | 2.0         | 3.0         |
| CDK4         | 5180        | 5069        | 5065        | 7095         | 7121         | 6998         | 7199         | 7133         | 7070         | 8361         | 8638         | 1.0        | 1.4        | 1.4         | 1.7         |
| RAPGEFL1     | 1145        | 1152        | 1117        | 2443         | 2232         | 2420         | 2240         | 2225         | 2234         | 3711         | 3551         | 1.0        | 2.1        | 2.0         | 3.2         |
| SIAH2        | 1749        | 1792        | 1709        | 2424         | 2413         | 2418         | 2397         | 2316         | 2330         | 2870         | 2933         | 1.0        | 1.4        | 1.3         | 1.7         |
| SLC39A6      | 8408        | 8559        | 8662        | 12745        | 12074        | 12539        | 11958        | 12150        | 11890        | 14550        | 15308        | 1.0        | 1.5        | 1.4         | 1.7         |
| POLD2        | 1617        | 1595        | 1637        | 2052         | 2153         | 2061         | 2065         | 2065         | 2023         | 2332         | 2154         | 1.0        | 1.3        | 1.3         | 1.4         |
| NOB1         | 2393        | 2289        | 2303        | 2710         | 2743         | 2674         | 2631         | 2718         | 2659         | 2851         | 2814         | 1.0        | 1.2        | 1.1         | 1.2         |
| NTHL1        | 253         | 260         | 309         | 389          | 406          | 363          | 405          | 457          | 456          | 463          | 473          | 1.0        | 1.4        | 1.6         | 1.7         |
| GTPBP3       | 494         | 477         | 523         | 664          | 639          | 608          | 616          | 661          | 718          | 732          | 717          | 1.0        | 1.3        | 1.3         | 1.5         |
| ZNRF1        | 3611        | 3608        | 3777        | 4364         | 4269         | 4356         | 4766         | 4538         | 4592         | 5067         | 5107         | 1.0        | 1.2        | 1.3         | 1.4         |
| GLB1L2       | 412         | 400         | 429         | 715          | 676          | 694          | 925          | 833          | 752          | 1050         | 1068         | 1.0        | 1.7        | 2.0         | 2.6         |
| <b>NRIP1</b> | <b>1169</b> | <b>1167</b> | <b>1326</b> | <b>1998</b>  | <b>2072</b>  | <b>1951</b>  | <b>2296</b>  | <b>2139</b>  | <b>2225</b>  | <b>2923</b>  | <b>2975</b>  | <b>1.0</b> | <b>1.6</b> | <b>1.8</b>  | <b>2.4</b>  |
| UBQLN4       | 3770        | 3702        | 3806        | 4659         | 4492         | 4521         | 4640         | 4774         | 4646         | 5297         | 5302         | 1.0        | 1.2        | 1.2         | 1.4         |
| STEAP3       | 1819        | 1664        | 1853        | 2309         | 2255         | 2247         | 2438         | 2414         | 2312         | 2655         | 2599         | 1.0        | 1.3        | 1.3         | 1.5         |
| GPR68        | 6           | 4           | 8           | 72           | 47           | 59           | 105          | 81           | 132          | 247          | 230          | 1.0        | 9.6        | 17.1        | 38.3        |
| CISH         | 238         | 245         | 303         | 510          | 401          | 507          | 567          | 523          | 577          | 845          | 758          | 1.0        | 1.8        | 2.1         | 3.1         |
| NPM3         | 808         | 868         | 879         | 1052         | 1037         | 1098         | 1169         | 1132         | 1192         | 1313         | 1311         | 1.0        | 1.2        | 1.4         | 1.5         |
| DIS3L        | 409         | 420         | 419         | 622          | 629          | 545          | 703          | 605          | 727          | 743          | 821          | 1.0        | 1.4        | 1.6         | 1.9         |
| <b>CA12</b>  | <b>1143</b> | <b>1148</b> | <b>1221</b> | <b>2746</b>  | <b>2613</b>  | <b>2610</b>  | <b>4183</b>  | <b>3913</b>  | <b>3876</b>  | <b>5778</b>  | <b>5996</b>  | <b>1.0</b> | <b>2.3</b> | <b>3.4</b>  | <b>5.0</b>  |
| <b>EGR3</b>  | <b>292</b>  | <b>322</b>  | <b>313</b>  | <b>1119</b>  | <b>1103</b>  | <b>1137</b>  | <b>2048</b>  | <b>2094</b>  | <b>2145</b>  | <b>4232</b>  | <b>4299</b>  | <b>1.0</b> | <b>3.6</b> | <b>6.8</b>  | <b>13.8</b> |
| CAND1        | 8498        | 8573        | 8438        | 9832         | 10160        | 9932         | 10984        | 10864        | 10718        | 11670        | 12115        | 1.0        | 1.2        | 1.3         | 1.4         |
| RASGRP1      | 2086        | 2037        | 2100        | 4013         | 3976         | 3905         | 5446         | 4895         | 5149         | 6524         | 6661         | 1.0        | 1.9        | 2.5         | 3.2         |
| MTHFD1       | 3156        | 3227        | 3027        | 4381         | 4329         | 4274         | 5131         | 4715         | 5000         | 5735         | 5915         | 1.0        | 1.4        | 1.6         | 1.9         |
| GINS2        | 887         | 855         | 783         | 1447         | 1402         | 1321         | 1683         | 1662         | 1689         | 1981         | 2102         | 1.0        | 1.7        | 2.0         | 2.4         |
| DCLRE1B      | 953         | 952         | 997         | 1431         | 1465         | 1313         | 1630         | 1583         | 1671         | 1764         | 1828         | 1.0        | 1.5        | 1.7         | 1.9         |
| CDC6         | 476         | 500         | 514         | 880          | 886          | 765          | 1084         | 1066         | 1179         | 1371         | 1421         | 1.0        | 1.7        | 2.2         | 2.8         |
| DTL          | 114         | 114         | 137         | 272          | 290          | 280          | 384          | 387          | 440          | 547          | 511          | 1.0        | 2.3        | 3.3         | 4.3         |
| AMZ1         | 157         | 206         | 169         | 421          | 464          | 375          | 501          | 513          | 570          | 825          | 771          | 1.0        | 2.4        | 3.0         | 4.5         |
| ADAT1        | 1411        | 1444        | 1465        | 1723         | 1706         | 1637         | 1774         | 1766         | 1743         | 1856         | 1860         | 1.0        | 1.2        | 1.2         | 1.3         |
| MYO19        | 1435        | 1448        | 1497        | 1902         | 1809         | 1630         | 1913         | 1785         | 1798         | 2044         | 1926         | 1.0        | 1.2        | 1.3         | 1.4         |
| OXA1L        | 2562        | 2656        | 2485        | 2807         | 2848         | 2939         | 3679         | 3292         | 3402         | 3312         | 3331         | 1.0        | 1.1        | 1.3         | 1.3         |
| RCCD1        | 459         | 437         | 425         | 574          | 512          | 566          | 774          | 705          | 693          | 685          | 575          | 1.0        | 1.3        | 1.6         | 1.4         |
| ACKR3        | 2150        | 2279        | 2229        | 2580         | 2389         | 2506         | 4230         | 4059         | 4327         | 3529         | 3916         | 1.0        | 1.1        | 1.9         | 1.7         |
| NR2F2        | 6680        | 6945        | 7012        | 7716         | 7297         | 7684         | 10819        | 11230        | 10773        | 9784         | 10021        | 1.0        | 1.1        | 1.6         | 1.4         |
| LSS          | 7808        | 7522        | 7648        | 8398         | 8116         | 8073         | 9321         | 9435         | 9387         | 9233         | 8943         | 1.0        | 1.1        | 1.2         | 1.2         |
| B3GALNT1     | 2884        | 2876        | 2564        | 3325         | 3267         | 3279         | 4572         | 4522         | 4728         | 5226         | 5600         | 1.0        | 1.2        | 1.7         | 2.0         |
| RBBP8        | 834         | 804         | 756         | 1052         | 1032         | 1010         | 1477         | 1367         | 1415         | 1813         | 1879         | 1.0        | 1.3        | 1.8         | 2.3         |
| NAA50        | 9861        | 9520        | 9214        | 10779        | 11185        | 10999        | 13062        | 13032        | 13048        | 14733        | 15336        | 1.0        | 1.2        | 1.4         | 1.6         |
| HELLS        | 475         | 454         | 388         | 625          | 639          | 582          | 947          | 952          | 909          | 1080         | 1139         | 1.0        | 1.4        | 2.1         | 2.5         |
| MXI1         | 335         | 289         | 261         | 407          | 430          | 431          | 645          | 555          | 572          | 724          | 744          | 1.0        | 1.4        | 2.0         | 2.5         |
| ALDH3A2      | 1582        | 1584        | 1508        | 1842         | 1710         | 1816         | 2141         | 2119         | 1962         | 2278         | 2351         | 1.0        | 1.1        | 1.3         | 1.5         |
| SF3B3        | 12123       | 11835       | 12138       | 13780        | 13592        | 13375        | 15725        | 15464        | 15840        | 16344        | 16476        | 1.0        | 1.1        | 1.3         | 1.4         |
| BRCA1        | 298         | 281         | 314         | 489          | 441          | 433          | 850          | 713          | 767          | 878          | 933          | 1.0        | 1.5        | 2.6         | 3.0         |
| WISP2        | 1344        | 1303        | 1260        | 2174         | 1941         | 1864         | 3325         | 3206         | 3137         | 4039         | 3860         | 1.0        | 1.5        | 2.5         | 3.0         |
| FEN1         | 1301        | 1320        | 1305        | 1938         | 1808         | 1777         | 2634         | 2684         | 2707         | 3214         | 3205         | 1.0        | 1.4        | 2.0         | 2.5         |
| PPM1K        | 298         | 272         | 281         | 564          | 442          | 517          | 1057         | 1116         | 1094         | 1385         | 1484         | 1.0        | 1.8        | 3.8         | 5.1         |
| XRCC5        | 9982        | 9883        | 9956        | 11167        | 10599        | 10873        | 12137        | 11800        | 12011        | 12342        | 12812        | 1.0        | 1.1        | 1.2         | 1.3         |
| TMEM97       | 1399        | 1367        | 1340        | 1835         | 1697         | 1822         | 2389         | 2254         | 2284         | 2480         | 2545         | 1.0        | 1.3        | 1.7         | 1.8         |
| NASP         | 1108        | 1222        | 1074        | 1555         | 1473         | 1460         | 1996         | 1990         | 2161         | 2318         | 2522         | 1.0        | 1.3        | 1.8         | 2.1         |
| CCDC117      | 1835        | 1899        | 1892        | 2273         | 2347         | 2249         | 2832         | 2703         | 2914         | 2961         | 3346         | 1.0        | 1.2        | 1.5         | 1.7         |
| TIFA         | 185         | 157         | 164         | 283          | 238          | 230          | 423          | 504          | 444          | 583          | 608          | 1.0        | 1.5        | 2.7         | 3.5         |
| VRK1         | 380         | 348         | 369         | 545          | 524          | 450          | 811          | 843          | 822          | 987          | 939          | 1.0        | 1.4        | 2.3         | 2.6         |
| XPO1         | 7335        | 7274        | 7180        | 8121         | 8055         | 7713         | 9547         | 9286         | 9554         | 9839         | 10293        | 1.0        | 1.1        | 1.3         | 1.4         |
| ERLIN1       | 971         | 965         | 1008        | 1199         | 1239         | 1125         | 1572         | 1614         | 1566         | 1726         | 1877         | 1.0        | 1.2        | 1.6         | 1.8         |

|             |            |            |            |            |             |            |             |             |             |             |             |            |            |             |             |
|-------------|------------|------------|------------|------------|-------------|------------|-------------|-------------|-------------|-------------|-------------|------------|------------|-------------|-------------|
| XRCC2       | 162        | 113        | 149        | 247        | 230         | 230        | 412         | 494         | 476         | 545         | 595         | 1.0        | 1.7        | 3.3         | 4.0         |
| TOPBP1      | 1946       | 1725       | 1757       | 2083       | 2173        | 2130       | 2709        | 2713        | 2741        | 2832        | 2912        | 1.0        | 1.2        | 1.5         | 1.6         |
| KNTC1       | 456        | 444        | 456        | 632        | 612         | 594        | 944         | 919         | 838         | 881         | 974         | 1.0        | 1.4        | 2.0         | 2.1         |
| C4orf19     | 895        | 824        | 810        | 1314       | 1281        | 1306       | 2345        | 2332        | 2168        | 2352        | 2408        | 1.0        | 1.5        | 2.7         | 2.8         |
| NUDT3       | 1466       | 1564       | 1531       | 1755       | 1770        | 1807       | 2105        | 2078        | 2064        | 2080        | 2161        | 1.0        | 1.2        | 1.4         | 1.4         |
| PCYOX1      | 3378       | 3434       | 3219       | 3676       | 3866        | 3812       | 4577        | 4478        | 4443        | 4390        | 4510        | 1.0        | 1.1        | 1.3         | 1.3         |
| ANXA9       | 265        | 297        | 257        | 362        | 363         | 388        | 535         | 633         | 566         | 607         | 615         | 1.0        | 1.4        | 2.1         | 2.2         |
| GGCT        | 2493       | 2741       | 2477       | 3018       | 3018        | 3086       | 3867        | 4030        | 3878        | 4301        | 4305        | 1.0        | 1.2        | 1.5         | 1.7         |
| PEX11A      | 208        | 281        | 232        | 379        | 405         | 402        | 760         | 741         | 733         | 915         | 968         | 1.0        | 1.6        | 3.1         | 3.9         |
| SSBP1       | 1779       | 1915       | 1762       | 2065       | 2093        | 2113       | 2429        | 2453        | 2468        | 2521        | 2561        | 1.0        | 1.1        | 1.3         | 1.4         |
| GINS1       | 676        | 845        | 683        | 999        | 1014        | 1010       | 1868        | 1803        | 1930        | 2110        | 2178        | 1.0        | 1.4        | 2.5         | 2.9         |
| PDCD4       | 1135       | 1275       | 1105       | 1542       | 1467        | 1532       | 2324        | 2505        | 2529        | 2689        | 2698        | 1.0        | 1.3        | 2.1         | 2.3         |
| PHB2        | 3477       | 3816       | 3417       | 4332       | 4112        | 4423       | 5454        | 5430        | 5457        | 5785        | 6040        | 1.0        | 1.2        | 1.5         | 1.7         |
| SLC39A8     | 1140       | 1293       | 1137       | 1464       | 1385        | 1461       | 2055        | 2073        | 2014        | 2132        | 2295        | 1.0        | 1.2        | 1.7         | 1.9         |
| STARD10     | 5536       | 5338       | 5446       | 6336       | 5808        | 6052       | 7873        | 8028        | 7527        | 8795        | 8872        | 1.0        | 1.1        | 1.4         | 1.6         |
| TST         | 1007       | 989        | 1061       | 1346       | 1273        | 1247       | 2172        | 2232        | 2165        | 2916        | 2748        | 1.0        | 1.3        | 2.1         | 2.8         |
| TSPAN15     | 1512       | 1595       | 1468       | 1945       | 1870        | 1846       | 3129        | 3111        | 3000        | 3800        | 3687        | 1.0        | 1.2        | 2.0         | 2.5         |
| ABHD2       | 5289       | 5087       | 5341       | 5604       | 5834        | 6016       | 11069       | 11314       | 10816       | 14020       | 14785       | 1.0        | 1.1        | 2.1         | 2.7         |
| UGDH        | 14413      | 14109      | 14425      | 14879      | 15391       | 15100      | 21513       | 21502       | 21179       | 24707       | 25017       | 1.0        | 1.1        | 1.5         | 1.7         |
| ELOVL5      | 2208       | 2205       | 2152       | 2486       | 2417        | 2515       | 4162        | 4340        | 4018        | 5191        | 5256        | 1.0        | 1.1        | 1.9         | 2.4         |
| HMCN1       | 2661       | 2709       | 2714       | 3028       | 3085        | 2982       | 3863        | 3614        | 4370        | 4126        | 4286        | 1.0        | 1.1        | 1.5         | 1.6         |
| SIVA1       | 2029       | 2070       | 2050       | 2245       | 2339        | 2282       | 2735        | 2706        | 2818        | 2887        | 3006        | 1.0        | 1.1        | 1.3         | 1.4         |
| NUP160      | 2745       | 2733       | 2680       | 2897       | 3052        | 3051       | 3456        | 3474        | 3702        | 3604        | 3810        | 1.0        | 1.1        | 1.3         | 1.4         |
| TYMS        | 750        | 769        | 632        | 843        | 949         | 873        | 1978        | 1795        | 1991        | 2020        | 1974        | 1.0        | 1.2        | 2.7         | 2.8         |
| CDC45       | 287        | 339        | 268        | 388        | 438         | 391        | 833         | 716         | 896         | 980         | 909         | 1.0        | 1.4        | 2.7         | 3.2         |
| RMI2        | 627        | 728        | 670        | 832        | 831         | 803        | 1205        | 1181        | 1232        | 1232        | 1164        | 1.0        | 1.2        | 1.8         | 1.8         |
| RNASEH2A    | 423        | 533        | 482        | 633        | 581         | 611        | 1049        | 1041        | 1118        | 1067        | 1001        | 1.0        | 1.3        | 2.2         | 2.2         |
| MASTL       | 441        | 395        | 411        | 542        | 573         | 572        | 1026        | 971         | 974         | 1105        | 1098        | 1.0        | 1.4        | 2.4         | 2.6         |
| NUP205      | 2489       | 2442       | 2443       | 2787       | 2956        | 2813       | 4063        | 3934        | 4040        | 4340        | 4296        | 1.0        | 1.2        | 1.6         | 1.8         |
| SKA3        | 261        | 224        | 240        | 298        | 376         | 333        | 754         | 692         | 719         | 779         | 822         | 1.0        | 1.4        | 3.0         | 3.3         |
| HLTF        | 2906       | 2812       | 2806       | 3331       | 3488        | 3343       | 4778        | 4966        | 4645        | 4838        | 5050        | 1.0        | 1.2        | 1.7         | 1.7         |
| NCAPD3      | 836        | 830        | 797        | 916        | 991         | 1009       | 1414        | 1369        | 1358        | 1412        | 1475        | 1.0        | 1.2        | 1.7         | 1.8         |
| XRCC6       | 8250       | 8026       | 8085       | 8749       | 8927        | 8702       | 10308       | 10265       | 10033       | 10728       | 10630       | 1.0        | 1.1        | 1.3         | 1.3         |
| EIF2AK4     | 1033       | 990        | 1011       | 1202       | 1185        | 1140       | 1626        | 1635        | 1564        | 1710        | 1598        | 1.0        | 1.2        | 1.6         | 1.6         |
| YBX1        | 13224      | 13561      | 13273      | 14968      | 15013       | 15260      | 17988       | 18650       | 18348       | 19005       | 19135       | 1.0        | 1.1        | 1.4         | 1.4         |
| CHAF1A      | 355        | 379        | 390        | 483        | 509         | 514        | 788         | 852         | 810         | 899         | 897         | 1.0        | 1.3        | 2.2         | 2.4         |
| CHEK2       | 223        | 256        | 229        | 380        | 380         | 374        | 821         | 805         | 814         | 1001        | 923         | 1.0        | 1.6        | 3.4         | 4.1         |
| MCM7        | 4986       | 5124       | 4965       | 7016       | 6805        | 6918       | 11451       | 11493       | 11294       | 13456       | 13075       | 1.0        | 1.4        | 2.3         | 2.6         |
| TFF3        | 519        | 634        | 606        | 808        | 806         | 939        | 1842        | 2204        | 1869        | 2464        | 2468        | 1.0        | 1.5        | 3.4         | 4.2         |
| MIS18BP1    | 538        | 591        | 615        | 748        | 715         | 731        | 1320        | 1436        | 1304        | 1415        | 1515        | 1.0        | 1.3        | 2.3         | 2.5         |
| LRIG1       | 1109       | 1177       | 1185       | 1350       | 1300        | 1345       | 1761        | 1731        | 1747        | 1803        | 1870        | 1.0        | 1.2        | 1.5         | 1.6         |
| CDC45       | 987        | 941        | 856        | 1290       | 1261        | 1148       | 2708        | 2587        | 2726        | 2799        | 2960        | 1.0        | 1.3        | 2.9         | 3.1         |
| <b>H19</b>  | <b>621</b> | <b>545</b> | <b>514</b> | <b>985</b> | <b>1017</b> | <b>915</b> | <b>5016</b> | <b>5300</b> | <b>5274</b> | <b>6293</b> | <b>6407</b> | <b>1.0</b> | <b>1.7</b> | <b>9.3</b>  | <b>11.3</b> |
| KNSTRN      | 360        | 320        | 326        | 464        | 412         | 422        | 935         | 905         | 903         | 932         | 1016        | 1.0        | 1.3        | 2.7         | 2.9         |
| C6orf132    | 142        | 155        | 148        | 237        | 229         | 186        | 656         | 661         | 623         | 632         | 716         | 1.0        | 1.5        | 4.4         | 4.5         |
| PRDX3       | 2081       | 1991       | 1882       | 2324       | 2323        | 2133       | 3665        | 3766        | 3368        | 3619        | 3895        | 1.0        | 1.1        | 1.8         | 1.9         |
| LAPTM4A     | 8704       | 8883       | 8557       | 9738       | 9462        | 9533       | 13679       | 13816       | 13496       | 14752       | 14481       | 1.0        | 1.1        | 1.6         | 1.7         |
| CKS1B       | 639        | 646        | 598        | 876        | 793         | 775        | 2042        | 2071        | 2009        | 2270        | 2221        | 1.0        | 1.3        | 3.2         | 3.6         |
| ASF1B       | 729        | 763        | 715        | 967        | 824         | 910        | 2167        | 2186        | 2014        | 2186        | 2301        | 1.0        | 1.2        | 2.9         | 3.1         |
| KIF22       | 2148       | 2205       | 2014       | 2589       | 2365        | 2450       | 4316        | 4127        | 4192        | 4251        | 4292        | 1.0        | 1.2        | 2.0         | 2.0         |
| PLK1        | 1464       | 1367       | 1354       | 1643       | 1719        | 1641       | 4821        | 4691        | 4793        | 4910        | 4644        | 1.0        | 1.2        | 3.4         | 3.4         |
| CENPF       | 818        | 845        | 781        | 983        | 1022        | 962        | 2777        | 2623        | 2874        | 2878        | 2967        | 1.0        | 1.2        | 3.4         | 3.6         |
| BIRC5       | 587        | 548        | 528        | 726        | 702         | 685        | 1938        | 1784        | 1900        | 1890        | 1932        | 1.0        | 1.3        | 3.4         | 3.4         |
| RACGAP1     | 1413       | 1384       | 1351       | 1601       | 1613        | 1560       | 2866        | 2791        | 2880        | 2771        | 2772        | 1.0        | 1.2        | 2.1         | 2.0         |
| FANCI       | 1961       | 1891       | 1849       | 2147       | 2254        | 2041       | 5558        | 5181        | 5240        | 5280        | 5706        | 1.0        | 1.1        | 2.8         | 2.9         |
| SMC4        | 2237       | 2282       | 2257       | 2625       | 2659        | 2433       | 5607        | 5636        | 5390        | 5467        | 5797        | 1.0        | 1.1        | 2.5         | 2.5         |
| CEP55       | 494        | 516        | 500        | 639        | 676         | 636        | 1834        | 1729        | 1676        | 1709        | 1942        | 1.0        | 1.3        | 3.5         | 3.6         |
| LIG1        | 1361       | 1409       | 1400       | 1673       | 1549        | 1660       | 3630        | 3361        | 3308        | 3504        | 3427        | 1.0        | 1.2        | 2.5         | 2.5         |
| H2AFZ       | 8136       | 8398       | 8242       | 9097       | 8850        | 9177       | 17386       | 17013       | 16367       | 17303       | 17536       | 1.0        | 1.1        | 2.0         | 2.1         |
| TPX2        | 1742       | 1787       | 1732       | 2127       | 1945        | 1898       | 5248        | 5135        | 5164        | 5290        | 5589        | 1.0        | 1.1        | 3.0         | 3.1         |
| MYBL2       | 3011       | 3207       | 3000       | 3474       | 3299        | 3366       | 6366        | 6125        | 6417        | 6354        | 6498        | 1.0        | 1.1        | 2.1         | 2.1         |
| CNNM2       | 2627       | 2549       | 2586       | 2757       | 2891        | 2949       | 5081        | 4786        | 4848        | 5483        | 5639        | 1.0        | 1.1        | 1.9         | 2.1         |
| NT5C2       | 4278       | 4081       | 4242       | 4526       | 4715        | 4685       | 8731        | 8484        | 8250        | 9247        | 9855        | 1.0        | 1.1        | 2.0         | 2.3         |
| CAV2        | 5380       | 5488       | 5344       | 5889       | 6075        | 6039       | 8119        | 8197        | 8129        | 8796        | 9054        | 1.0        | 1.1        | 1.5         | 1.7         |
| DARS2       | 1079       | 1098       | 976        | 1235       | 1326        | 1306       | 2605        | 2669        | 2515        | 2829        | 2958        | 1.0        | 1.2        | 2.5         | 2.8         |
| <b>AREG</b> | <b>108</b> | <b>105</b> | <b>144</b> | <b>196</b> | <b>263</b>  | <b>251</b> | <b>2021</b> | <b>2194</b> | <b>1787</b> | <b>2864</b> | <b>3026</b> | <b>1.0</b> | <b>2.0</b> | <b>16.8</b> | <b>24.7</b> |

|              |              |              |              |              |              |              |              |              |              |              |              |            |            |            |            |
|--------------|--------------|--------------|--------------|--------------|--------------|--------------|--------------|--------------|--------------|--------------|--------------|------------|------------|------------|------------|
| ZWILCH       | 825          | 768          | 794          | 979          | 1055         | 1016         | 1956         | 1968         | 1862         | 2059         | 2225         | 1.0        | 1.3        | 2.4        | 2.7        |
| MBNL1        | 3998         | 3998         | 4159         | 4296         | 4602         | 4612         | 6725         | 6635         | 6777         | 6379         | 6678         | 1.0        | 1.1        | 1.7        | 1.6        |
| FIGN         | 174          | 140          | 175          | 250          | 223          | 271          | 731          | 848          | 781          | 842          | 891          | 1.0        | 1.5        | 4.8        | 5.3        |
| BUB1B        | 276          | 353          | 335          | 440          | 431          | 469          | 1253         | 1239         | 1274         | 1214         | 1360         | 1.0        | 1.4        | 3.9        | 4.0        |
| CENPA        | 234          | 292          | 248          | 353          | 409          | 384          | 998          | 972          | 1020         | 1043         | 1061         | 1.0        | 1.5        | 3.9        | 4.1        |
| CCP110       | 901          | 904          | 908          | 1016         | 1070         | 1078         | 1790         | 1674         | 1739         | 1856         | 1862         | 1.0        | 1.2        | 1.9        | 2.1        |
| KPNA2        | 10105        | 10056        | 9602         | 11167        | 11174        | 11176        | 17278        | 16324        | 16536        | 17517        | 17361        | 1.0        | 1.1        | 1.7        | 1.8        |
| TIMELESS     | 1977         | 2060         | 2074         | 2463         | 2470         | 2411         | 3890         | 3786         | 3899         | 4179         | 4007         | 1.0        | 1.2        | 1.9        | 2.0        |
| PWP1         | 2428         | 2405         | 2467         | 2794         | 2698         | 2814         | 3763         | 3491         | 3462         | 3750         | 3713         | 1.0        | 1.1        | 1.5        | 1.5        |
| RELL1        | 342          | 338          | 377          | 484          | 453          | 488          | 942          | 862          | 810          | 863          | 864          | 1.0        | 1.3        | 2.5        | 2.5        |
| RPLP0        | 70551        | 69416        | 68624        | 73967        | 71465        | 73187        | 84229        | 82016        | 82925        | 83224        | 82803        | 1.0        | 1.0        | 1.2        | 1.2        |
| TRIP13       | 434          | 456          | 448          | 675          | 598          | 580          | 1240         | 1194         | 1228         | 1312         | 1395         | 1.0        | 1.4        | 2.7        | 3.0        |
| RAD51        | 190          | 176          | 183          | 296          | 247          | 277          | 630          | 586          | 630          | 675          | 737          | 1.0        | 1.5        | 3.4        | 3.9        |
| RPS24        | 22828        | 22235        | 22122        | 24267        | 23353        | 23903        | 27456        | 27485        | 27350        | 27513        | 28580        | 1.0        | 1.1        | 1.2        | 1.3        |
| RPL4         | 53347        | 53902        | 52998        | 57075        | 55817        | 58113        | 66440        | 65116        | 64927        | 66826        | 68025        | 1.0        | 1.1        | 1.2        | 1.3        |
| CDC25A       | 112          | 135          | 143          | 248          | 242          | 186          | 330          | 383          | 352          | 437          | 388          | 1.0        | 1.7        | 2.7        | 3.2        |
| POLE2        | 62           | 73           | 74           | 150          | 128          | 95           | 209          | 205          | 251          | 273          | 268          | 1.0        | 1.8        | 3.2        | 3.9        |
| TBCD         | 2443         | 2617         | 2612         | 2998         | 2826         | 2860         | 3263         | 3063         | 3245         | 3343         | 3187         | 1.0        | 1.1        | 1.2        | 1.3        |
| HADH         | 767          | 821          | 779          | 970          | 963          | 945          | 1349         | 1277         | 1369         | 1563         | 1492         | 1.0        | 1.2        | 1.7        | 1.9        |
| CCDC170      | 389          | 433          | 401          | 599          | 509          | 570          | 894          | 847          | 867          | 1052         | 1029         | 1.0        | 1.4        | 2.1        | 2.6        |
| PCNA         | 1725         | 1762         | 1605         | 2597         | 2215         | 2405         | 4289         | 4098         | 4193         | 5043         | 4984         | 1.0        | 1.4        | 2.5        | 3.0        |
| E2F1         | 380          | 389          | 398          | 547          | 516          | 572          | 943          | 778          | 848          | 1099         | 983          | 1.0        | 1.4        | 2.2        | 2.7        |
| LMNB2        | 3985         | 4074         | 4120         | 4485         | 4393         | 4522         | 5337         | 5286         | 5565         | 5820         | 5692         | 1.0        | 1.1        | 1.3        | 1.4        |
| DNMT1        | 3240         | 3358         | 3450         | 3896         | 3706         | 3788         | 4790         | 4674         | 5123         | 5294         | 5244         | 1.0        | 1.1        | 1.5        | 1.6        |
| MCM5         | 935          | 1051         | 1053         | 1630         | 1535         | 1519         | 2422         | 2495         | 2430         | 2768         | 2736         | 1.0        | 1.5        | 2.4        | 2.7        |
| WDHD1        | 371          | 428          | 411          | 719          | 642          | 621          | 1097         | 1172         | 1144         | 1309         | 1391         | 1.0        | 1.6        | 2.8        | 3.3        |
| <b>IGF1R</b> | <b>16129</b> | <b>16488</b> | <b>17020</b> | <b>20928</b> | <b>20478</b> | <b>20748</b> | <b>24756</b> | <b>26115</b> | <b>25606</b> | <b>27935</b> | <b>27698</b> | <b>1.0</b> | <b>1.3</b> | <b>1.5</b> | <b>1.7</b> |
| <b>XBP1</b>  | <b>5252</b>  | <b>5386</b>  | <b>5297</b>  | <b>12974</b> | <b>12888</b> | <b>12757</b> | <b>34491</b> | <b>38839</b> | <b>33195</b> | <b>49168</b> | <b>50437</b> | <b>1.0</b> | <b>2.4</b> | <b>6.7</b> | <b>9.4</b> |
| <b>CTSD</b>  | <b>6508</b>  | <b>6982</b>  | <b>6851</b>  | <b>15405</b> | <b>14239</b> | <b>14082</b> | <b>35509</b> | <b>38612</b> | <b>34277</b> | <b>53525</b> | <b>53380</b> | <b>1.0</b> | <b>2.1</b> | <b>5.3</b> | <b>7.9</b> |
| PKIB         | 75           | 85           | 106          | 268          | 259          | 235          | 1056         | 1263         | 1138         | 1709         | 1947         | 1.0        | 2.9        | 13.0       | 20.6       |
| SKP2         | 120          | 130          | 163          | 233          | 268          | 273          | 577          | 608          | 618          | 690          | 785          | 1.0        | 1.9        | 4.4        | 5.4        |
| UHRF1        | 2931         | 3002         | 3006         | 3658         | 3662         | 3659         | 4621         | 4685         | 4609         | 5548         | 5621         | 1.0        | 1.2        | 1.6        | 1.9        |
| BRCA2        | 201          | 221          | 217          | 303          | 345          | 334          | 645          | 627          | 567          | 792          | 828          | 1.0        | 1.5        | 2.9        | 3.8        |
| CDC44        | 1077         | 1139         | 1060         | 1302         | 1329         | 1365         | 1815         | 1803         | 1786         | 2127         | 2151         | 1.0        | 1.2        | 1.6        | 2.0        |
| FBL          | 3851         | 4055         | 3983         | 4504         | 4658         | 4737         | 5457         | 5464         | 5562         | 6287         | 5786         | 1.0        | 1.2        | 1.4        | 1.5        |
| POP7         | 1471         | 1457         | 1465         | 1706         | 1732         | 1654         | 2027         | 1988         | 2084         | 2305         | 2028         | 1.0        | 1.2        | 1.4        | 1.5        |
| POLD1        | 671          | 663          | 671          | 970          | 863          | 866          | 1285         | 1207         | 1275         | 1457         | 1297         | 1.0        | 1.3        | 1.9        | 2.1        |
| NDC1         | 838          | 824          | 810          | 1041         | 1091         | 1045         | 1636         | 1462         | 1534         | 1623         | 1600         | 1.0        | 1.3        | 1.9        | 2.0        |
| UBE2T        | 509          | 491          | 469          | 680          | 690          | 660          | 1135         | 1102         | 1201         | 1253         | 1143         | 1.0        | 1.4        | 2.3        | 2.4        |
| TTC8         | 644          | 643          | 625          | 798          | 762          | 789          | 1023         | 1019         | 1062         | 1086         | 1020         | 1.0        | 1.2        | 1.6        | 1.7        |
| CHTF18       | 615          | 555          | 622          | 727          | 755          | 853          | 1094         | 1065         | 1039         | 1127         | 1049         | 1.0        | 1.3        | 1.8        | 1.8        |
| THRAP3       | 3588         | 3513         | 3610         | 3933         | 3817         | 3969         | 4299         | 4220         | 4191         | 4441         | 4305         | 1.0        | 1.1        | 1.2        | 1.2        |
| SSRP1        | 4233         | 4126         | 4287         | 4853         | 4851         | 4815         | 5444         | 5359         | 5245         | 5857         | 5724         | 1.0        | 1.1        | 1.3        | 1.4        |
| MRPL49       | 3002         | 2880         | 2891         | 3339         | 3177         | 3257         | 3662         | 3848         | 3699         | 3932         | 3763         | 1.0        | 1.1        | 1.3        | 1.3        |
| DHCR7        | 8668         | 8330         | 9022         | 9768         | 9480         | 9700         | 10758        | 11387        | 11089        | 12185        | 11557        | 1.0        | 1.1        | 1.3        | 1.4        |
| MRPL4        | 2592         | 2864         | 2748         | 3088         | 3057         | 3101         | 2878         | 2935         | 2854         | 3145         | 3031         | 1.0        | 1.1        | 1.1        | 1.1        |
| NXT1         | 666          | 743          | 708          | 862          | 863          | 971          | 729          | 814          | 812          | 924          | 972          | 1.0        | 1.3        | 1.1        | 1.3        |
| CCDC85B      | 1745         | 1915         | 1829         | 2315         | 2319         | 2406         | 1841         | 1959         | 2123         | 2452         | 2294         | 1.0        | 1.3        | 1.1        | 1.3        |
| QTRTD1       | 1736         | 1746         | 1765         | 2051         | 2069         | 2151         | 1829         | 1845         | 1981         | 2072         | 2064         | 1.0        | 1.2        | 1.1        | 1.2        |
| C3orf70      | 49           | 65           | 59           | 118          | 122          | 130          | 75           | 83           | 130          | 129          | 113          | 1.0        | 2.2        | 1.7        | 2.1        |
| CCNB1IP1     | 624          | 663          | 694          | 770          | 856          | 911          | 747          | 793          | 847          | 892          | 865          | 1.0        | 1.3        | 1.2        | 1.3        |
| TRAPPC2L     | 2197         | 2397         | 2424         | 2562         | 2579         | 2788         | 2434         | 2610         | 2701         | 2613         | 2611         | 1.0        | 1.1        | 1.1        | 1.1        |
| ZNF236       | 445          | 496          | 457          | 629          | 577          | 596          | 478          | 652          | 550          | 576          | 641          | 1.0        | 1.3        | 1.2        | 1.3        |
| ILF3-AS1     | 498          | 525          | 525          | 608          | 701          | 615          | 564          | 583          | 606          | 610          | 682          | 1.0        | 1.2        | 1.1        | 1.3        |
| REV3L        | 1716         | 1798         | 1736         | 2012         | 2101         | 1912         | 1851         | 1878         | 2011         | 1948         | 2026         | 1.0        | 1.1        | 1.1        | 1.1        |
| KBTD6        | 368          | 349          | 358          | 495          | 453          | 460          | 425          | 478          | 449          | 488          | 410          | 1.0        | 1.3        | 1.3        | 1.3        |
| ORC2         | 1176         | 1215         | 1209         | 1497         | 1415         | 1381         | 1421         | 1420         | 1345         | 1485         | 1411         | 1.0        | 1.2        | 1.2        | 1.2        |
| ATRIP        | 166          | 187          | 213          | 311          | 275          | 267          | 273          | 264          | 242          | 273          | 275          | 1.0        | 1.5        | 1.4        | 1.5        |
| TP53         | 3538         | 3333         | 3562         | 4368         | 3989         | 4011         | 4122         | 4105         | 4022         | 4140         | 4075         | 1.0        | 1.2        | 1.2        | 1.2        |
| PYGL         | 3571         | 3499         | 3683         | 4093         | 3948         | 3891         | 4019         | 3949         | 3926         | 4002         | 4022         | 1.0        | 1.1        | 1.1        | 1.1        |
| FAM117B      | 449          | 561          | 500          | 676          | 681          | 636          | 682          | 657          | 691          | 722          | 601          | 1.0        | 1.3        | 1.3        | 1.3        |
| ZNRD1        | 78           | 127          | 119          | 179          | 174          | 194          | 198          | 182          | 166          | 213          | 200          | 1.0        | 1.7        | 1.7        | 1.9        |
| ADA          | 80           | 92           | 80           | 139          | 122          | 143          | 128          | 131          | 132          | 128          | 136          | 1.0        | 1.6        | 1.6        | 1.6        |
| CSTF1        | 1894         | 1935         | 1902         | 2212         | 2188         | 2250         | 2085         | 2247         | 2127         | 2238         | 2238         | 1.0        | 1.2        | 1.1        | 1.2        |
| MEIS1        | 82           | 117          | 101          | 188          | 184          | 176          | 154          | 197          | 173          | 194          | 195          | 1.0        | 1.8        | 1.7        | 1.9        |
| EHMT2        | 1849         | 1958         | 1968         | 2254         | 2260         | 2295         | 2257         | 2204         | 2378         | 2534         | 2348         | 1.0        | 1.2        | 1.2        | 1.3        |

|              |           |           |           |            |            |            |            |            |            |            |            |            |             |            |             |
|--------------|-----------|-----------|-----------|------------|------------|------------|------------|------------|------------|------------|------------|------------|-------------|------------|-------------|
| EEF2K        | 2276      | 2272      | 2235      | 2649       | 2628       | 2622       | 2616       | 2624       | 2689       | 2804       | 2595       | 1.0        | 1.2         | 1.2        | 1.2         |
| RBM24        | 14        | 26        | 13        | 85         | 94         | 90         | 76         | 82         | 89         | 176        | 185        | 1.0        | 5.0         | 4.6        | 10.1        |
| TRA2B        | 6074      | 6468      | 6083      | 7101       | 7001       | 7197       | 7051       | 6936       | 7066       | 7642       | 7541       | 1.0        | 1.1         | 1.1        | 1.2         |
| SLC2A1       | 1622      | 1603      | 1712      | 4621       | 4449       | 4443       | 3893       | 3996       | 3906       | 6374       | 6278       | 1.0        | 2.7         | 2.4        | 3.8         |
| SFXN2        | 186       | 159       | 173       | 730        | 700        | 695        | 561        | 572        | 563        | 1138       | 1077       | 1.0        | 4.1         | 3.3        | 6.4         |
| C1orf226     | 99        | 91        | 103       | 413        | 452        | 423        | 282        | 301        | 310        | 676        | 649        | 1.0        | 4.4         | 3.0        | 6.8         |
| TFAP4        | 200       | 204       | 218       | 445        | 503        | 450        | 400        | 380        | 434        | 600        | 564        | 1.0        | 2.2         | 2.0        | 2.8         |
| SLC35F6      | 2711      | 2733      | 2821      | 4341       | 4306       | 4165       | 4224       | 3837       | 3831       | 5213       | 4925       | 1.0        | 1.6         | 1.4        | 1.8         |
| ZNF703       | 2129      | 2340      | 2224      | 3771       | 3508       | 3587       | 3214       | 3278       | 3247       | 4380       | 4098       | 1.0        | 1.6         | 1.5        | 1.9         |
| LTBP1        | 2466      | 2544      | 2507      | 3713       | 3580       | 3630       | 3357       | 3168       | 3460       | 4091       | 4174       | 1.0        | 1.5         | 1.3        | 1.6         |
| CD320        | 623       | 646       | 673       | 866        | 849        | 913        | 879        | 832        | 859        | 1026       | 936        | 1.0        | 1.4         | 1.3        | 1.5         |
| IMPDH2       | 4167      | 4054      | 4075      | 4989       | 4864       | 5149       | 4983       | 4773       | 4943       | 5273       | 5239       | 1.0        | 1.2         | 1.2        | 1.3         |
| CCDC88C      | 1524      | 1490      | 1576      | 1729       | 1758       | 1754       | 1454       | 1564       | 1682       | 1832       | 1828       | 1.0        | 1.1         | 1.0        | 1.2         |
| IFT57        | 1279      | 1315      | 1168      | 1433       | 1502       | 1435       | 1275       | 1127       | 1407       | 1541       | 1514       | 1.0        | 1.2         | 1.0        | 1.2         |
| NIP7         | 1449      | 1548      | 1520      | 1942       | 1705       | 1877       | 1670       | 1612       | 1585       | 1900       | 1895       | 1.0        | 1.2         | 1.1        | 1.3         |
| TRIM28       | 18167     | 18385     | 18783     | 21057      | 19886      | 20790      | 19599      | 19261      | 18961      | 20223      | 20474      | 1.0        | 1.1         | 1.0        | 1.1         |
| RTN4RL1      | 556       | 554       | 566       | 804        | 695        | 666        | 608        | 626        | 620        | 711        | 695        | 1.0        | 1.3         | 1.1        | 1.3         |
| TYSND1       | 1075      | 1059      | 1021      | 1442       | 1296       | 1343       | 1078       | 1137       | 1189       | 1363       | 1232       | 1.0        | 1.3         | 1.1        | 1.2         |
| NHP2         | 6039      | 6446      | 6113      | 7225       | 6899       | 7156       | 6239       | 6295       | 6469       | 6935       | 6823       | 1.0        | 1.1         | 1.0        | 1.1         |
| TRPC6        | 4         | 6         | 5         | 56         | 45         | 93         | 7          | 11         | 8          | 36         | 57         | 1.0        | 12.9        | 1.7        | 9.3         |
| HCK          | 3         | 5         | 3         | 75         | 55         | 77         | 5          | 7          | 4          | 47         | 44         | 1.0        | 18.7        | 1.4        | 12.4        |
| SLC7A5       | 5970      | 5904      | 6319      | 11305      | 11169      | 11275      | 6218       | 6415       | 5980       | 10127      | 9700       | 1.0        | 1.9         | 1.0        | 1.6         |
| NOLC1        | 6575      | 6530      | 6334      | 9241       | 9184       | 9243       | 6365       | 6273       | 6401       | 8459       | 8449       | 1.0        | 1.4         | 1.0        | 1.3         |
| FADS1        | 2744      | 2563      | 2679      | 3953       | 3810       | 3717       | 2890       | 2984       | 2897       | 3441       | 3517       | 1.0        | 1.4         | 1.1        | 1.3         |
| CEBPZ        | 2486      | 2451      | 2370      | 2943       | 2916       | 2838       | 2461       | 2559       | 2576       | 2747       | 2850       | 1.0        | 1.2         | 1.0        | 1.1         |
| FKBP4        | 13105     | 12798     | 12780     | 15511      | 15695      | 15494      | 13069      | 12980      | 12866      | 15466      | 15348      | 1.0        | 1.2         | 1.0        | 1.2         |
| HSPD1        | 21850     | 20903     | 20312     | 25057      | 25815      | 25085      | 21960      | 20721      | 21147      | 24861      | 25603      | 1.0        | 1.2         | 1.0        | 1.2         |
| PPAT         | 1405      | 1275      | 1366      | 1768       | 1785       | 1655       | 1382       | 1359       | 1364       | 1711       | 1643       | 1.0        | 1.3         | 1.0        | 1.2         |
| DDX10        | 614       | 636       | 644       | 808        | 850        | 808        | 610        | 596        | 600        | 777        | 824        | 1.0        | 1.3         | 1.0        | 1.3         |
| BRI3BP       | 2580      | 2654      | 2649      | 3375       | 3385       | 3271       | 2680       | 2730       | 2697       | 3228       | 3439       | 1.0        | 1.3         | 1.0        | 1.3         |
| FOXC1        | 321       | 299       | 320       | 407        | 447        | 504        | 327        | 336        | 324        | 465        | 459        | 1.0        | 1.4         | 1.0        | 1.5         |
| FLAD1        | 1614      | 1621      | 1630      | 1861       | 1851       | 1961       | 1655       | 1617       | 1663       | 1904       | 1842       | 1.0        | 1.2         | 1.0        | 1.2         |
| FARSB        | 1513      | 1495      | 1461      | 1895       | 1887       | 1925       | 1691       | 1632       | 1595       | 1915       | 1994       | 1.0        | 1.3         | 1.1        | 1.3         |
| PPIF         | 2319      | 2335      | 2324      | 3495       | 3733       | 3674       | 2830       | 2860       | 2881       | 3667       | 3841       | 1.0        | 1.6         | 1.2        | 1.6         |
| UCK2         | 1842      | 1764      | 1710      | 2454       | 2428       | 2418       | 1991       | 1978       | 2057       | 2546       | 2507       | 1.0        | 1.4         | 1.1        | 1.4         |
| OSGIN1       | 718       | 708       | 658       | 1268       | 1226       | 1174       | 941        | 872        | 925        | 1358       | 1448       | 1.0        | 1.8         | 1.3        | 2.0         |
| PRMT5        | 3480      | 3281      | 3268      | 4404       | 4369       | 4315       | 3830       | 3729       | 3794       | 4304       | 4335       | 1.0        | 1.3         | 1.1        | 1.3         |
| IVNS1ABP     | 3958      | 4030      | 3904      | 4651       | 4624       | 4651       | 4359       | 4039       | 4184       | 4651       | 4812       | 1.0        | 1.2         | 1.1        | 1.2         |
| SERBP1       | 10130     | 10395     | 10336     | 11631      | 12147      | 11767      | 10995      | 10580      | 10797      | 12126      | 12263      | 1.0        | 1.2         | 1.0        | 1.2         |
| ABCE1        | 3546      | 3398      | 3289      | 4152       | 4440       | 4186       | 3628       | 3586       | 3588       | 4011       | 4298       | 1.0        | 1.2         | 1.1        | 1.2         |
| PUS7         | 2280      | 2149      | 1946      | 2598       | 2744       | 2687       | 2303       | 2219       | 2238       | 2757       | 2847       | 1.0        | 1.3         | 1.1        | 1.3         |
| AARS         | 7817      | 7611      | 7620      | 8667       | 8825       | 8588       | 7876       | 8063       | 7927       | 9149       | 9000       | 1.0        | 1.1         | 1.0        | 1.2         |
| CXCL12       | 1232      | 1220      | 1124      | 2483       | 2419       | 2418       | 1425       | 1361       | 1277       | 3298       | 3293       | 1.0        | 2.0         | 1.1        | 2.8         |
| SLC9A3R1     | 6921      | 6999      | 7153      | 11355      | 10915      | 11174      | 8095       | 8200       | 8227       | 12517      | 11974      | 1.0        | 1.6         | 1.2        | 1.7         |
| ELFN2        | 610       | 615       | 625       | 1279       | 1231       | 1231       | 700        | 784        | 740        | 1456       | 1298       | 1.0        | 2.0         | 1.2        | 2.2         |
| MIR3615      | 961       | 1051      | 977       | 1624       | 1560       | 1607       | 1156       | 1156       | 1115       | 1921       | 1751       | 1.0        | 1.6         | 1.1        | 1.8         |
| IL17RB       | 210       | 204       | 180       | 326        | 296        | 297        | 247        | 217        | 201        | 348        | 288        | 1.0        | 1.5         | 1.1        | 1.6         |
| GPHN         | 700       | 645       | 650       | 906        | 912        | 961        | 814        | 691        | 740        | 965        | 921        | 1.0        | 1.4         | 1.1        | 1.4         |
| GPC6         | 875       | 954       | 947       | 1217       | 1314       | 1126       | 1068       | 892        | 922        | 1133       | 1252       | 1.0        | 1.3         | 1.0        | 1.3         |
| ZC3H8        | 473       | 469       | 456       | 640        | 599        | 645        | 576        | 418        | 522        | 608        | 623        | 1.0        | 1.3         | 1.1        | 1.3         |
| NARS         | 3369      | 3252      | 3244      | 3652       | 3604       | 3538       | 3565       | 3314       | 3336       | 3614       | 3689       | 1.0        | 1.1         | 1.0        | 1.1         |
| DDX39A       | 2840      | 2668      | 2697      | 3163       | 3009       | 3158       | 3072       | 2926       | 2890       | 3142       | 3152       | 1.0        | 1.1         | 1.1        | 1.2         |
| TIMM9        | 782       | 755       | 754       | 964        | 884        | 1000       | 882        | 888        | 843        | 965        | 969        | 1.0        | 1.2         | 1.1        | 1.3         |
| ST6GALNAC2   | 2316      | 2261      | 2365      | 3022       | 2810       | 3059       | 2972       | 2900       | 2778       | 3070       | 3161       | 1.0        | 1.3         | 1.2        | 1.3         |
| FIBP         | 2565      | 2441      | 2506      | 2831       | 2712       | 2857       | 2795       | 2757       | 2763       | 2817       | 2879       | 1.0        | 1.1         | 1.1        | 1.1         |
| PALB2        | 749       | 709       | 664       | 1012       | 936        | 953        | 950        | 908        | 885        | 992        | 1026       | 1.0        | 1.4         | 1.3        | 1.4         |
| GTF3A        | 2255      | 2239      | 2142      | 2694       | 2621       | 2555       | 2559       | 2466       | 2561       | 2749       | 2770       | 1.0        | 1.2         | 1.1        | 1.2         |
| NAT10        | 2356      | 2373      | 2375      | 3349       | 3429       | 3171       | 3077       | 3063       | 3029       | 3428       | 3576       | 1.0        | 1.4         | 1.3        | 1.5         |
| TPD52L1      | 1139      | 1136      | 1101      | 3852       | 3928       | 3958       | 2983       | 2867       | 2920       | 4548       | 4942       | 1.0        | 3.5         | 2.6        | 4.2         |
| CAV1         | 10901     | 11048     | 11280     | 18597      | 17948      | 18433      | 17304      | 16089      | 16819      | 19839      | 20098      | 1.0        | 1.7         | 1.5        | 1.8         |
| <b>PDZK1</b> | <b>27</b> | <b>31</b> | <b>20</b> | <b>445</b> | <b>521</b> | <b>399</b> | <b>185</b> | <b>195</b> | <b>212</b> | <b>580</b> | <b>560</b> | <b>1.0</b> | <b>17.4</b> | <b>7.6</b> | <b>21.8</b> |
| C1QTNF6      | 1525      | 1598      | 1491      | 3995       | 3759       | 3915       | 3032       | 2871       | 2849       | 3996       | 3770       | 1.0        | 2.5         | 1.9        | 2.5         |
| BZW2         | 4445      | 4335      | 4423      | 5004       | 5070       | 4995       | 4879       | 4885       | 4710       | 5100       | 5117       | 1.0        | 1.1         | 1.1        | 1.2         |
| RNF223       | 315       | 283       | 318       | 835        | 796        | 839        | 705        | 750        | 617        | 1010       | 1000       | 1.0        | 2.7         | 2.3        | 3.3         |
| TMPRSS3      | 13        | 12        | 17        | 109        | 87         | 118        | 66         | 80         | 52         | 156        | 162        | 1.0        | 7.6         | 4.8        | 11.5        |
| ATIC         | 4212      | 3939      | 4256      | 5505       | 5320       | 5301       | 5308       | 5002       | 4875       | 5479       | 5593       | 1.0        | 1.3         | 1.2        | 1.3         |

|            |            |            |            |            |            |            |            |            |            |             |             |            |            |            |            |
|------------|------------|------------|------------|------------|------------|------------|------------|------------|------------|-------------|-------------|------------|------------|------------|------------|
| OXSM       | 255        | 210        | 212        | 345        | 314        | 312        | 330        | 264        | 291        | 301         | 330         | 1.0        | 1.4        | 1.3        | 1.4        |
| USP54      | 620        | 582        | 520        | 778        | 693        | 691        | 718        | 718        | 662        | 732         | 757         | 1.0        | 1.3        | 1.2        | 1.3        |
| FH         | 1390       | 1397       | 1342       | 1721       | 1526       | 1565       | 1673       | 1548       | 1562       | 1596        | 1774        | 1.0        | 1.2        | 1.2        | 1.2        |
| WDR35      | 295        | 288        | 312        | 503        | 389        | 437        | 391        | 427        | 395        | 442         | 597         | 1.0        | 1.5        | 1.4        | 1.7        |
| DOC2A      | 385        | 389        | 385        | 549        | 502        | 517        | 473        | 454        | 464        | 478         | 551         | 1.0        | 1.4        | 1.2        | 1.3        |
| TCFL5      | 1419       | 1454       | 1449       | 1740       | 1716       | 1654       | 1678       | 1633       | 1676       | 1652        | 1842        | 1.0        | 1.2        | 1.2        | 1.2        |
| RPGRIP1L   | 142        | 141        | 142        | 217        | 226        | 197        | 178        | 211        | 190        | 193         | 237         | 1.0        | 1.5        | 1.4        | 1.5        |
| NOS1AP     | 36         | 48         | 43         | 174        | 177        | 152        | 114        | 131        | 75         | 153         | 219         | 1.0        | 4.0        | 2.5        | 4.4        |
| FAM217B    | 1249       | 1227       | 1238       | 1504       | 1582       | 1596       | 1470       | 1483       | 1488       | 1462        | 1643        | 1.0        | 1.3        | 1.2        | 1.3        |
| HDDC2      | 1432       | 1481       | 1332       | 2134       | 2322       | 2172       | 1815       | 1944       | 1958       | 2238        | 2406        | 1.0        | 1.6        | 1.3        | 1.6        |
| SRRM1      | 3107       | 3020       | 3053       | 3399       | 3557       | 3453       | 3355       | 3321       | 3305       | 3459        | 3576        | 1.0        | 1.1        | 1.1        | 1.1        |
| DDX19A     | 1721       | 1695       | 1603       | 1963       | 1908       | 1937       | 1759       | 1757       | 1776       | 1812        | 1936        | 1.0        | 1.2        | 1.1        | 1.1        |
| PRDX6      | 7705       | 7854       | 7389       | 8558       | 8191       | 8280       | 8019       | 7884       | 8131       | 8497        | 8385        | 1.0        | 1.1        | 1.0        | 1.1        |
| CDH1       | 36859      | 35563      | 36943      | 39082      | 39381      | 39317      | 38462      | 38622      | 38701      | 44145       | 43866       | 1.0        | 1.1        | 1.1        | 1.2        |
| MGHAT5     | 4286       | 4356       | 4527       | 4992       | 5006       | 4934       | 4790       | 5108       | 4834       | 6510        | 6405        | 1.0        | 1.1        | 1.1        | 1.5        |
| MLPH       | 7913       | 7795       | 7824       | 8719       | 8229       | 8335       | 8487       | 8321       | 7724       | 9662        | 9520        | 1.0        | 1.1        | 1.0        | 1.2        |
| TOR3A      | 2951       | 2862       | 3007       | 3257       | 3402       | 3175       | 3053       | 3041       | 2997       | 3512        | 3498        | 1.0        | 1.1        | 1.0        | 1.2        |
| IGFBP4     | 4029       | 3930       | 3921       | 5490       | 5389       | 5562       | 4357       | 4398       | 4402       | 7647        | 7313        | 1.0        | 1.4        | 1.1        | 1.9        |
| TIPARP     | 609        | 578        | 619        | 930        | 908        | 934        | 774        | 789        | 784        | 1301        | 1359        | 1.0        | 1.5        | 1.3        | 2.2        |
| ATP2C1     | 6866       | 6807       | 6597       | 7248       | 7191       | 7219       | 7121       | 6911       | 6958       | 7447        | 7682        | 1.0        | 1.1        | 1.0        | 1.1        |
| SYNCRIP    | 9642       | 9842       | 9620       | 10171      | 10485      | 10558      | 10154      | 9957       | 9890       | 10617       | 11290       | 1.0        | 1.1        | 1.0        | 1.1        |
| MAPT       | 643        | 685        | 710        | 820        | 838        | 795        | 897        | 806        | 771        | 1048        | 1060        | 1.0        | 1.2        | 1.2        | 1.6        |
| PSMG1      | 1140       | 1106       | 1257       | 1441       | 1419       | 1365       | 1426       | 1386       | 1458       | 1653        | 1743        | 1.0        | 1.2        | 1.2        | 1.5        |
| CELSR2     | 20184      | 19677      | 20569      | 25581      | 25580      | 24330      | 25614      | 26419      | 25915      | 33943       | 33830       | 1.0        | 1.2        | 1.3        | 1.7        |
| HR         | 1235       | 1158       | 1243       | 1572       | 1566       | 1589       | 1728       | 1663       | 1678       | 2204        | 2342        | 1.0        | 1.3        | 1.4        | 1.9        |
| FKBP5      | 1287       | 1310       | 1296       | 1644       | 1707       | 1617       | 1743       | 1601       | 1771       | 2274        | 2220        | 1.0        | 1.3        | 1.3        | 1.7        |
| <b>PGR</b> | <b>111</b> | <b>157</b> | <b>167</b> | <b>419</b> | <b>382</b> | <b>375</b> | <b>466</b> | <b>538</b> | <b>461</b> | <b>1319</b> | <b>1409</b> | <b>1.0</b> | <b>2.7</b> | <b>3.4</b> | <b>9.4</b> |
| JARID2     | 1874       | 1981       | 1992       | 2356       | 2401       | 2323       | 2376       | 2379       | 2489       | 3029        | 3102        | 1.0        | 1.2        | 1.2        | 1.6        |
| PFKFB3     | 7221       | 7351       | 7581       | 8562       | 9002       | 9016       | 8598       | 8651       | 8869       | 10196       | 10543       | 1.0        | 1.2        | 1.2        | 1.4        |
| NFIC       | 2753       | 2854       | 2959       | 3257       | 3286       | 3352       | 3379       | 3246       | 3364       | 3888        | 3849        | 1.0        | 1.2        | 1.2        | 1.4        |
| AEN        | 1904       | 1826       | 1941       | 2116       | 2106       | 2118       | 2069       | 1974       | 2130       | 2352        | 2297        | 1.0        | 1.1        | 1.1        | 1.2        |
| COLGALT1   | 2194       | 2035       | 2260       | 2430       | 2502       | 2425       | 2408       | 2351       | 2382       | 2874        | 2708        | 1.0        | 1.1        | 1.1        | 1.3        |
| DCTPP1     | 2695       | 2905       | 2713       | 3426       | 3329       | 3412       | 2955       | 3271       | 3372       | 3922        | 3555        | 1.0        | 1.2        | 1.2        | 1.3        |
| ENTPD1     | 424        | 414        | 388        | 560        | 577        | 528        | 481        | 558        | 623        | 653         | 658         | 1.0        | 1.4        | 1.4        | 1.6        |
| OVOL2      | 89         | 84         | 60         | 128        | 145        | 124        | 94         | 113        | 110        | 154         | 136         | 1.0        | 1.7        | 1.4        | 1.9        |
| KNOP1      | 1551       | 1490       | 1452       | 1751       | 1765       | 1667       | 1606       | 1750       | 1694       | 1848        | 1745        | 1.0        | 1.2        | 1.1        | 1.2        |
| INTS5      | 1074       | 1110       | 1064       | 1213       | 1319       | 1283       | 1233       | 1186       | 1180       | 1409        | 1285        | 1.0        | 1.2        | 1.1        | 1.2        |
| MRPL15     | 1585       | 1756       | 1594       | 1843       | 2066       | 2115       | 1862       | 1902       | 1893       | 2212        | 2015        | 1.0        | 1.2        | 1.1        | 1.3        |
| ZNHIT6     | 488        | 469        | 522        | 616        | 714        | 678        | 615        | 640        | 663        | 779         | 767         | 1.0        | 1.4        | 1.3        | 1.6        |
| BRIX1      | 1030       | 1014       | 1037       | 1144       | 1288       | 1251       | 1219       | 1185       | 1262       | 1395        | 1401        | 1.0        | 1.2        | 1.2        | 1.4        |
| NUP93      | 1135       | 1094       | 1152       | 1297       | 1410       | 1370       | 1335       | 1310       | 1392       | 1470        | 1410        | 1.0        | 1.2        | 1.2        | 1.3        |
| MOCOS      | 256        | 277        | 238        | 347        | 354        | 346        | 361        | 327        | 304        | 441         | 460         | 1.0        | 1.4        | 1.3        | 1.8        |
| URI1       | 1881       | 1901       | 1755       | 2022       | 2150       | 2115       | 2113       | 2017       | 1957       | 2247        | 2204        | 1.0        | 1.1        | 1.1        | 1.2        |
| AHSA1      | 7020       | 6688       | 6669       | 7688       | 7862       | 7781       | 7436       | 7329       | 7194       | 8281        | 8105        | 1.0        | 1.1        | 1.1        | 1.2        |
| WDR89      | 600        | 542        | 538        | 742        | 798        | 782        | 763        | 664        | 670        | 838         | 837         | 1.0        | 1.4        | 1.2        | 1.5        |
| NEIL2      | 394        | 366        | 345        | 522        | 540        | 567        | 496        | 518        | 485        | 628         | 636         | 1.0        | 1.5        | 1.4        | 1.7        |
| CNBP       | 13574      | 13507      | 13030      | 14594      | 14744      | 15073      | 14340      | 14193      | 14305      | 15220       | 15405       | 1.0        | 1.1        | 1.1        | 1.1        |
| SFXN4      | 549        | 594        | 618        | 741        | 787        | 742        | 690        | 675        | 680        | 793         | 885         | 1.0        | 1.3        | 1.2        | 1.4        |
| SGPP1      | 773        | 880        | 790        | 1092       | 1060       | 1066       | 954        | 1001       | 955        | 1274        | 1384        | 1.0        | 1.3        | 1.2        | 1.6        |
| DNMBP      | 1923       | 1974       | 1931       | 2488       | 2566       | 2413       | 2332       | 2357       | 2414       | 2863        | 3052        | 1.0        | 1.3        | 1.2        | 1.5        |
| ZNRF3      | 523        | 577        | 542        | 736        | 716        | 677        | 672        | 689        | 695        | 838         | 878         | 1.0        | 1.3        | 1.3        | 1.6        |
| TELO2      | 2766       | 2809       | 2790       | 3371       | 3250       | 3428       | 3170       | 3154       | 3191       | 3781        | 3558        | 1.0        | 1.2        | 1.1        | 1.3        |
| HSPB8      | 1026       | 1053       | 1122       | 2647       | 2684       | 2527       | 2278       | 2148       | 1960       | 4538        | 4757        | 1.0        | 2.5        | 2.0        | 4.4        |
| TSKU       | 372        | 352        | 376        | 786        | 822        | 817        | 753        | 717        | 681        | 1228        | 1325        | 1.0        | 2.2        | 2.0        | 3.5        |
| MTR        | 1333       | 1301       | 1380       | 1779       | 1719       | 1692       | 1622       | 1599       | 1621       | 1946        | 2016        | 1.0        | 1.3        | 1.2        | 1.5        |
| GEMIN4     | 984        | 954        | 1019       | 1331       | 1279       | 1362       | 1137       | 1135       | 1134       | 1453        | 1517        | 1.0        | 1.3        | 1.2        | 1.5        |
| ELP2       | 1975       | 1970       | 1999       | 2600       | 2445       | 2682       | 2313       | 2289       | 2352       | 2721        | 2877        | 1.0        | 1.3        | 1.2        | 1.4        |
| RBM14      | 2694       | 2671       | 2696       | 3336       | 3157       | 3284       | 3093       | 3046       | 2946       | 3498        | 3467        | 1.0        | 1.2        | 1.1        | 1.3        |
| TUFM       | 6983       | 7158       | 7104       | 7958       | 7860       | 7899       | 7538       | 7472       | 7448       | 8165        | 8172        | 1.0        | 1.1        | 1.1        | 1.2        |
| CNKSR3     | 495        | 513        | 535        | 654        | 646        | 641        | 591        | 610        | 643        | 669         | 678         | 1.0        | 1.3        | 1.2        | 1.3        |
| HEY2       | 39         | 35         | 54         | 131        | 135        | 119        | 68         | 77         | 102        | 134         | 156         | 1.0        | 3.0        | 1.9        | 3.4        |
| PDPR       | 2003       | 1960       | 2175       | 2701       | 2610       | 2572       | 2390       | 2253       | 2564       | 2739        | 2840        | 1.0        | 1.3        | 1.2        | 1.4        |
| USP37      | 641        | 705        | 673        | 902        | 874        | 785        | 756        | 750        | 811        | 896         | 891         | 1.0        | 1.3        | 1.1        | 1.3        |
| OGFOD1     | 911        | 849        | 925        | 1119       | 1139       | 1101       | 999        | 1040       | 1068       | 1260        | 1092        | 1.0        | 1.3        | 1.2        | 1.3        |
| TSEN54     | 2316       | 2280       | 2302       | 2801       | 2653       | 2612       | 2519       | 2510       | 2507       | 2822        | 2754        | 1.0        | 1.2        | 1.1        | 1.2        |
| MRPS34     | 2909       | 2857       | 2883       | 3404       | 3357       | 3222       | 3215       | 3126       | 3030       | 3633        | 3369        | 1.0        | 1.2        | 1.1        | 1.2        |

|           |       |       |       |       |       |       |       |       |       |       |       |     |     |     |     |
|-----------|-------|-------|-------|-------|-------|-------|-------|-------|-------|-------|-------|-----|-----|-----|-----|
| DNASE1    | 3011  | 2953  | 2938  | 3500  | 3363  | 3437  | 3122  | 3234  | 3133  | 3552  | 3394  | 1.0 | 1.2 | 1.1 | 1.2 |
| NHP2L1    | 2614  | 2712  | 2684  | 3473  | 3404  | 3410  | 3112  | 2948  | 2946  | 3543  | 3229  | 1.0 | 1.3 | 1.1 | 1.3 |
| PRMT5-AS1 | 1686  | 1556  | 1718  | 2076  | 2150  | 1926  | 1737  | 1746  | 1914  | 2016  | 2170  | 1.0 | 1.2 | 1.1 | 1.3 |
| THAP9-AS1 | 467   | 413   | 417   | 575   | 585   | 536   | 480   | 481   | 501   | 539   | 629   | 1.0 | 1.3 | 1.1 | 1.4 |
| IVD       | 2968  | 2873  | 3051  | 3376  | 3188  | 3281  | 3151  | 3072  | 3290  | 3371  | 3466  | 1.0 | 1.1 | 1.1 | 1.2 |
| ANKRD17   | 5467  | 5212  | 5420  | 6013  | 5992  | 5900  | 5798  | 5600  | 5886  | 6092  | 6464  | 1.0 | 1.1 | 1.1 | 1.2 |
| TSEN2     | 357   | 275   | 324   | 459   | 406   | 469   | 383   | 341   | 403   | 512   | 511   | 1.0 | 1.4 | 1.2 | 1.6 |
| KIAA0100  | 12080 | 11718 | 12289 | 12905 | 12834 | 12852 | 12611 | 12455 | 12510 | 12742 | 13005 | 1.0 | 1.1 | 1.0 | 1.1 |

**CLUSTER 2**

| Gene        | Normalised Expression |             |             |             |             |             |             |             |             |             |             | Mean Expression Difference |            |            |            |
|-------------|-----------------------|-------------|-------------|-------------|-------------|-------------|-------------|-------------|-------------|-------------|-------------|----------------------------|------------|------------|------------|
|             | MCF7                  |             |             | MCF7        |             |             | Y537S       |             |             | Y537S       |             | MCF7                       | MCF7       | Y537S      | Y537S      |
|             | Vehicle               |             |             | Estrogen    |             |             | Vehicle     |             |             | Estrogen    |             | Vehicle                    | Estrogen   | Vehicle    | Estrogen   |
|             | 1                     | 2           | 3           | 1           | 2           | 3           | 1           | 2           | 3           | 1           | 2           |                            |            |            |            |
| DFFA        | 1588                  | 1447        | 1474        | 1776        | 1748        | 1968        | 1677        | 1644        | 1437        | 1766        | 1788        | 1.0                        | 1.2        | 1.1        | 1.2        |
| ERI3        | 1033                  | 1070        | 1067        | 1236        | 1198        | 1303        | 1103        | 1146        | 1029        | 1145        | 1198        | 1.0                        | 1.2        | 1.0        | 1.1        |
| MPHOSPH10   | 1813                  | 1725        | 1688        | 2028        | 2185        | 2125        | 1957        | 1849        | 1951        | 1981        | 2045        | 1.0                        | 1.2        | 1.1        | 1.2        |
| PIGW        | 599                   | 665         | 585         | 747         | 866         | 789         | 701         | 664         | 687         | 772         | 793         | 1.0                        | 1.3        | 1.1        | 1.3        |
| CCDC80      | 36                    | 39          | 26          | 61          | 84          | 83          | 56          | 48          | 52          | 72          | 81          | 1.0                        | 2.2        | 1.5        | 2.3        |
| ZBTB2       | 1086                  | 1123        | 1105        | 1639        | 1518        | 1550        | 1409        | 1270        | 1170        | 1434        | 1533        | 1.0                        | 1.4        | 1.2        | 1.3        |
| AK4         | 1493                  | 1511        | 1517        | 1961        | 1959        | 2109        | 1756        | 1666        | 1544        | 1911        | 2036        | 1.0                        | 1.3        | 1.1        | 1.3        |
| TSFM        | 900                   | 933         | 932         | 1188        | 1183        | 1166        | 1065        | 1035        | 953         | 1073        | 1078        | 1.0                        | 1.3        | 1.1        | 1.2        |
| SNHG16      | 3349                  | 3361        | 3317        | 4219        | 4231        | 4394        | 3843        | 3803        | 3972        | 4206        | 4224        | 1.0                        | 1.3        | 1.2        | 1.3        |
| <b>RET</b>  | <b>2827</b>           | <b>2863</b> | <b>2791</b> | <b>4242</b> | <b>4438</b> | <b>4497</b> | <b>3753</b> | <b>3478</b> | <b>3678</b> | <b>4120</b> | <b>4064</b> | <b>1.0</b>                 | <b>1.6</b> | <b>1.3</b> | <b>1.4</b> |
| STC2        | 3855                  | 3828        | 3774        | 21474       | 21281       | 21007       | 9247        | 10029       | 9279        | 16947       | 17037       | 1.0                        | 5.6        | 2.5        | 4.4        |
| DLC1        | 534                   | 496         | 548         | 928         | 900         | 935         | 719         | 692         | 718         | 798         | 777         | 1.0                        | 1.8        | 1.3        | 1.5        |
| LINC01016   | 1                     | 1           | 2           | 102         | 113         | 106         | 12          | 33          | 21          | 73          | 51          | 1.0                        | 82.0       | 16.9       | 47.5       |
| EXOSC5      | 491                   | 482         | 464         | 645         | 735         | 729         | 553         | 601         | 590         | 679         | 638         | 1.0                        | 1.5        | 1.2        | 1.4        |
| RRP1B       | 3806                  | 3871        | 3717        | 4813        | 4785        | 4729        | 4060        | 4058        | 3997        | 4694        | 4546        | 1.0                        | 1.3        | 1.1        | 1.2        |
| PFAS        | 731                   | 692         | 798         | 1191        | 1179        | 1202        | 823         | 882         | 816         | 1185        | 1103        | 1.0                        | 1.6        | 1.1        | 1.5        |
| <b>RARA</b> | <b>4841</b>           | <b>4853</b> | <b>4884</b> | <b>6528</b> | <b>6665</b> | <b>6781</b> | <b>4975</b> | <b>5309</b> | <b>5325</b> | <b>6577</b> | <b>6372</b> | <b>1.0</b>                 | <b>1.4</b> | <b>1.1</b> | <b>1.3</b> |
| GPR132      | 80                    | 70          | 106         | 223         | 253         | 216         | 142         | 124         | 105         | 225         | 228         | 1.0                        | 2.7        | 1.4        | 2.7        |
| STARD7      | 8302                  | 8183        | 8339        | 9519        | 9642        | 9400        | 8778        | 8629        | 8894        | 9383        | 9331        | 1.0                        | 1.2        | 1.1        | 1.1        |
| CAD         | 5118                  | 4842        | 5218        | 6567        | 6682        | 6623        | 5493        | 5328        | 5598        | 6589        | 6552        | 1.0                        | 1.3        | 1.1        | 1.3        |
| NCL         | 30986                 | 30273       | 30781       | 39192       | 39947       | 39678       | 33698       | 32809       | 34518       | 40035       | 39645       | 1.0                        | 1.3        | 1.1        | 1.3        |
| NOP56       | 3826                  | 3750        | 3893        | 5168        | 5382        | 5176        | 4293        | 4194        | 4446        | 5135        | 5182        | 1.0                        | 1.4        | 1.1        | 1.3        |
| PDCD5       | 1523                  | 1347        | 1343        | 1567        | 1670        | 1654        | 1460        | 1484        | 1461        | 1563        | 1671        | 1.0                        | 1.2        | 1.0        | 1.2        |
| HLA-DRB5    | 44                    | 29          | 23          | 61          | 71          | 76          | 32          | 46          | 37          | 66          | 59          | 1.0                        | 2.2        | 1.2        | 1.9        |
| NOP58       | 2399                  | 2132        | 2133        | 2763        | 2825        | 2887        | 2416        | 2648        | 2515        | 2907        | 3021        | 1.0                        | 1.3        | 1.1        | 1.3        |
| TFRC        | 21605                 | 21364       | 21313       | 24817       | 25828       | 25698       | 23204       | 24105       | 23068       | 26739       | 27369       | 1.0                        | 1.2        | 1.1        | 1.3        |
| C17orf97    | 75                    | 65          | 64          | 111         | 122         | 129         | 81          | 121         | 77          | 113         | 125         | 1.0                        | 1.8        | 1.4        | 1.8        |
| POLR3C      | 1224                  | 1165        | 1236        | 1350        | 1493        | 1503        | 1316        | 1459        | 1302        | 1512        | 1450        | 1.0                        | 1.2        | 1.1        | 1.2        |
| HEATR1      | 2925                  | 2673        | 3193        | 3277        | 3477        | 3435        | 2990        | 2909        | 2881        | 3139        | 3204        | 1.0                        | 1.2        | 1.0        | 1.1        |
| CIRH1A      | 2149                  | 2046        | 2183        | 2585        | 2549        | 2650        | 2114        | 2097        | 2180        | 2502        | 2339        | 1.0                        | 1.2        | 1.0        | 1.1        |
| PPFIA4      | 71                    | 59          | 104         | 202         | 206         | 234         | 88          | 97          | 72          | 165         | 141         | 1.0                        | 2.8        | 1.1        | 2.0        |
| ILF3        | 13543                 | 13357       | 13565       | 14779       | 14532       | 14731       | 13981       | 13579       | 13694       | 14278       | 14247       | 1.0                        | 1.1        | 1.0        | 1.1        |
| TTLL12      | 2444                  | 2472        | 2517        | 2999        | 2980        | 3074        | 2678        | 2516        | 2542        | 2875        | 2751        | 1.0                        | 1.2        | 1.0        | 1.1        |
| GAPDHS      | 78                    | 56          | 87          | 128         | 139         | 137         | 93          | 72          | 92          | 139         | 105         | 1.0                        | 1.8        | 1.2        | 1.7        |
| ZBTB24      | 483                   | 488         | 510         | 564         | 722         | 641         | 555         | 522         | 511         | 560         | 557         | 1.0                        | 1.3        | 1.1        | 1.1        |
| MRPS35      | 1802                  | 1774        | 1731        | 1911        | 2164        | 1995        | 1843        | 1855        | 1811        | 1904        | 2036        | 1.0                        | 1.1        | 1.0        | 1.1        |
| FASTKD2     | 1116                  | 1060        | 1086        | 1171        | 1375        | 1378        | 1225        | 1221        | 1174        | 1300        | 1253        | 1.0                        | 1.2        | 1.1        | 1.2        |
| FAM136A     | 2986                  | 2942        | 2895        | 3261        | 3269        | 3312        | 2848        | 3136        | 2983        | 3006        | 3358        | 1.0                        | 1.1        | 1.0        | 1.1        |
| HPDL        | 111                   | 103         | 106         | 163         | 160         | 173         | 88          | 101         | 94          | 118         | 176         | 1.0                        | 1.5        | 0.9        | 1.4        |
| FAM86B1     | 79                    | 62          | 89          | 123         | 142         | 118         | 67          | 110         | 83          | 87          | 115         | 1.0                        | 1.7        | 1.1        | 1.3        |
| CRTAP       | 2397                  | 2590        | 2654        | 2844        | 2811        | 2881        | 2830        | 2727        | 2631        | 2748        | 2682        | 1.0                        | 1.1        | 1.1        | 1.1        |
| HLF         | 22                    | 43          | 59          | 89          | 100         | 119         | 45          | 36          | 33          | 67          | 65          | 1.0                        | 2.5        | 0.9        | 1.6        |
| PMM2        | 2337                  | 2420        | 2543        | 2709        | 2723        | 2772        | 2446        | 2444        | 2553        | 2599        | 2574        | 1.0                        | 1.1        | 1.0        | 1.1        |
| SETBP1      | 281                   | 348         | 358         | 457         | 388         | 495         | 364         | 324         | 368         | 373         | 353         | 1.0                        | 1.4        | 1.1        | 1.1        |
| FRAT2       | 597                   | 582         | 615         | 811         | 771         | 735         | 710         | 614         | 634         | 668         | 676         | 1.0                        | 1.3        | 1.1        | 1.1        |
| CLUAP1      | 260                   | 231         | 244         | 331         | 356         | 330         | 302         | 264         | 287         | 273         | 275         | 1.0                        | 1.4        | 1.2        | 1.1        |
| SLC26A2     | 837                   | 846         | 842         | 1148        | 1160        | 1124        | 933         | 846         | 917         | 805         | 845         | 1.0                        | 1.4        | 1.1        | 1.0        |
| PIK3R1      | 2108                  | 2030        | 1959        | 2828        | 2908        | 2820        | 2065        | 2071        | 2182        | 2081        | 2284        | 1.0                        | 1.4        | 1.0        | 1.1        |
| NADSYN1     | 1736                  | 1752        | 1858        | 2141        | 1958        | 2165        | 1985        | 1805        | 1904        | 1948        | 2063        | 1.0                        | 1.2        | 1.1        | 1.1        |
| SUPV3L1     | 559                   | 567         | 609         | 804         | 679         | 727         | 693         | 604         | 654         | 669         | 737         | 1.0                        | 1.3        | 1.1        | 1.2        |
| ANKMY1      | 456                   | 414         | 457         | 587         | 529         | 593         | 478         | 524         | 522         | 489         | 512         | 1.0                        | 1.3        | 1.1        | 1.1        |
| ALG1        | 911                   | 925         | 937         | 1255        | 1223        | 1208        | 1022        | 1058        | 1062        | 1079        | 1049        | 1.0                        | 1.3        | 1.1        | 1.2        |



|          |       |       |       |       |       |       |       |       |       |       |       |     |     |     |     |
|----------|-------|-------|-------|-------|-------|-------|-------|-------|-------|-------|-------|-----|-----|-----|-----|
| POFUT1   | 1926  | 1822  | 1901  | 2262  | 2272  | 2261  | 1977  | 2030  | 2020  | 2129  | 2058  | 1.0 | 1.2 | 1.1 | 1.1 |
| AFAP1L2  | 547   | 595   | 583   | 755   | 679   | 701   | 577   | 635   | 522   | 514   | 530   | 1.0 | 1.2 | 1.0 | 0.9 |
| PGP      | 1631  | 1681  | 1795  | 2063  | 1954  | 2091  | 1595  | 1730  | 1474  | 1624  | 1549  | 1.0 | 1.2 | 0.9 | 0.9 |
| CHERP    | 3108  | 3025  | 3171  | 3442  | 3590  | 3424  | 3014  | 3113  | 3149  | 3088  | 3124  | 1.0 | 1.1 | 1.0 | 1.0 |
| RASL10B  | 208   | 182   | 239   | 301   | 292   | 297   | 159   | 192   | 219   | 208   | 219   | 1.0 | 1.4 | 0.9 | 1.0 |
| CSRP2BP  | 659   | 588   | 668   | 803   | 783   | 736   | 638   | 651   | 698   | 655   | 646   | 1.0 | 1.2 | 1.0 | 1.0 |
| FAM86C1  | 314   | 319   | 313   | 441   | 430   | 421   | 293   | 341   | 314   | 359   | 316   | 1.0 | 1.4 | 1.0 | 1.1 |
| FAM86EP  | 110   | 88    | 98    | 195   | 181   | 165   | 85    | 116   | 102   | 119   | 100   | 1.0 | 1.8 | 1.0 | 1.1 |
| DANCR    | 884   | 873   | 851   | 1197  | 1000  | 1045  | 888   | 883   | 916   | 940   | 846   | 1.0 | 1.2 | 1.0 | 1.0 |
| IMP3     | 1734  | 1681  | 1883  | 2082  | 1949  | 1988  | 1737  | 1738  | 1703  | 1874  | 1701  | 1.0 | 1.1 | 1.0 | 1.0 |
| SELO     | 1019  | 1090  | 1061  | 1244  | 1214  | 1228  | 1001  | 1052  | 1130  | 1158  | 1000  | 1.0 | 1.2 | 1.0 | 1.0 |
| FAM46A   | 1093  | 1210  | 1152  | 1318  | 1351  | 1314  | 1179  | 1114  | 1064  | 1173  | 1229  | 1.0 | 1.2 | 1.0 | 1.0 |
| NPIP3    | 401   | 465   | 442   | 523   | 549   | 575   | 445   | 423   | 380   | 409   | 421   | 1.0 | 1.3 | 1.0 | 1.0 |
| DLX1     | 439   | 456   | 488   | 599   | 612   | 549   | 505   | 459   | 454   | 530   | 488   | 1.0 | 1.3 | 1.0 | 1.1 |
| SLC25A15 | 678   | 770   | 752   | 895   | 994   | 924   | 788   | 735   | 759   | 852   | 789   | 1.0 | 1.3 | 1.0 | 1.1 |
| NLE1     | 685   | 716   | 733   | 919   | 944   | 867   | 704   | 644   | 709   | 729   | 669   | 1.0 | 1.3 | 1.0 | 1.0 |
| NCR3LG1  | 17    | 32    | 31    | 79    | 63    | 71    | 19    | 13    | 17    | 30    | 35    | 1.0 | 2.6 | 0.6 | 1.2 |
| TBL3     | 1498  | 1637  | 1673  | 2030  | 1882  | 1944  | 1452  | 1402  | 1573  | 1711  | 1562  | 1.0 | 1.2 | 0.9 | 1.0 |
| LAP3     | 2784  | 3082  | 2938  | 3262  | 3390  | 3181  | 2829  | 2723  | 2785  | 3067  | 2878  | 1.0 | 1.1 | 0.9 | 1.0 |
| HTT      | 8104  | 8065  | 8262  | 9170  | 9603  | 9138  | 7973  | 7974  | 8620  | 8709  | 8801  | 1.0 | 1.1 | 1.0 | 1.1 |
| SRR      | 785   | 765   | 790   | 900   | 965   | 924   | 723   | 731   | 766   | 862   | 862   | 1.0 | 1.2 | 0.9 | 1.1 |
| SRPRB    | 2796  | 2710  | 2766  | 3096  | 3263  | 3154  | 2669  | 2717  | 2778  | 3015  | 3077  | 1.0 | 1.2 | 1.0 | 1.1 |
| MAP6D1   | 1031  | 984   | 902   | 1113  | 1333  | 1247  | 963   | 927   | 986   | 1133  | 1051  | 1.0 | 1.3 | 1.0 | 1.1 |
| RRP1     | 2966  | 3190  | 2978  | 3551  | 3808  | 3773  | 2927  | 2928  | 3181  | 3738  | 3431  | 1.0 | 1.2 | 1.0 | 1.2 |
| CD3EAP   | 1704  | 1623  | 1732  | 1937  | 2006  | 1963  | 1606  | 1493  | 1546  | 1954  | 1715  | 1.0 | 1.2 | 0.9 | 1.1 |
| EMC1     | 1827  | 1675  | 1737  | 2039  | 1972  | 1995  | 1792  | 1644  | 1681  | 1937  | 1796  | 1.0 | 1.1 | 1.0 | 1.1 |
| SLC25A19 | 281   | 290   | 284   | 403   | 410   | 428   | 304   | 270   | 268   | 403   | 320   | 1.0 | 1.5 | 1.0 | 1.3 |
| IFRD2    | 1577  | 1581  | 1493  | 2146  | 2160  | 2050  | 1559  | 1434  | 1469  | 1950  | 1788  | 1.0 | 1.4 | 1.0 | 1.2 |
| AKAP1    | 4773  | 4167  | 4511  | 5829  | 5726  | 5618  | 4261  | 4150  | 4442  | 4934  | 4933  | 1.0 | 1.3 | 1.0 | 1.1 |
| GPATCH4  | 1637  | 1394  | 1530  | 1960  | 1888  | 1857  | 1453  | 1390  | 1398  | 1678  | 1655  | 1.0 | 1.3 | 0.9 | 1.1 |
| PES1     | 5168  | 4838  | 4842  | 6028  | 6020  | 6177  | 4576  | 4518  | 4640  | 5262  | 5219  | 1.0 | 1.2 | 0.9 | 1.1 |
| SNHG1    | 1613  | 1451  | 1457  | 1878  | 1861  | 2009  | 1464  | 1374  | 1390  | 1640  | 1541  | 1.0 | 1.3 | 0.9 | 1.1 |
| QTRT1    | 667   | 604   | 653   | 797   | 769   | 768   | 579   | 576   | 597   | 709   | 639   | 1.0 | 1.2 | 0.9 | 1.1 |
| POLR1A   | 4323  | 4070  | 4289  | 5256  | 5460  | 5280  | 3716  | 3807  | 4163  | 4654  | 4304  | 1.0 | 1.3 | 0.9 | 1.1 |
| CLUH     | 4949  | 4960  | 5201  | 6520  | 6186  | 6336  | 4648  | 4756  | 4690  | 5715  | 5449  | 1.0 | 1.3 | 0.9 | 1.1 |
| FARSA    | 3481  | 3438  | 3352  | 4116  | 3939  | 4064  | 3129  | 3089  | 3151  | 3734  | 3510  | 1.0 | 1.2 | 0.9 | 1.1 |
| LONRF2   | 1789  | 1818  | 1798  | 2832  | 2881  | 2723  | 1369  | 1473  | 1467  | 2190  | 2057  | 1.0 | 1.6 | 0.8 | 1.2 |
| IMP4     | 3567  | 3411  | 3317  | 4182  | 4248  | 4235  | 3350  | 3464  | 3269  | 3927  | 3836  | 1.0 | 1.2 | 1.0 | 1.1 |
| ARHGAP26 | 867   | 751   | 813   | 1562  | 1558  | 1504  | 761   | 754   | 673   | 1190  | 1186  | 1.0 | 1.9 | 0.9 | 1.5 |
| NOP2     | 2027  | 1895  | 1919  | 2580  | 2566  | 2431  | 1945  | 1955  | 1916  | 2259  | 2178  | 1.0 | 1.3 | 1.0 | 1.1 |
| PLEKHH1  | 717   | 677   | 678   | 830   | 876   | 835   | 674   | 719   | 695   | 791   | 777   | 1.0 | 1.2 | 1.0 | 1.1 |
| IPO5     | 4036  | 3712  | 3848  | 4437  | 4591  | 4252  | 3848  | 3887  | 3727  | 4182  | 4147  | 1.0 | 1.1 | 1.0 | 1.1 |
| NOC3L    | 749   | 678   | 673   | 863   | 882   | 849   | 735   | 678   | 664   | 769   | 845   | 1.0 | 1.2 | 1.0 | 1.2 |
| LARS     | 3577  | 3418  | 3512  | 3984  | 4086  | 4003  | 3463  | 3296  | 3416  | 3617  | 3898  | 1.0 | 1.1 | 1.0 | 1.1 |
| UTP20    | 2644  | 2610  | 2633  | 3149  | 3509  | 3171  | 2695  | 2544  | 2580  | 2859  | 3137  | 1.0 | 1.2 | 1.0 | 1.1 |
| ISG20L2  | 2875  | 2859  | 2801  | 3635  | 3611  | 3639  | 2732  | 2854  | 2801  | 3123  | 3079  | 1.0 | 1.3 | 1.0 | 1.1 |
| PNPO     | 1197  | 1247  | 1206  | 1606  | 1589  | 1535  | 1161  | 1149  | 1216  | 1388  | 1337  | 1.0 | 1.3 | 1.0 | 1.1 |
| SLC16A6  | 225   | 233   | 198   | 372   | 357   | 366   | 205   | 192   | 199   | 258   | 276   | 1.0 | 1.7 | 0.9 | 1.2 |
| EIF3B    | 13674 | 13950 | 13650 | 16027 | 15853 | 16089 | 13351 | 12843 | 13437 | 14398 | 14173 | 1.0 | 1.2 | 1.0 | 1.0 |
| PWP2     | 1878  | 1818  | 1825  | 2149  | 2229  | 2386  | 1780  | 1748  | 1828  | 2068  | 2048  | 1.0 | 1.2 | 1.0 | 1.1 |
| IL1RAP   | 207   | 227   | 206   | 316   | 350   | 392   | 188   | 187   | 188   | 261   | 268   | 1.0 | 1.7 | 0.9 | 1.2 |
| WDR3     | 2047  | 1887  | 1791  | 2904  | 2904  | 2665  | 1922  | 1775  | 1960  | 2523  | 2512  | 1.0 | 1.5 | 1.0 | 1.3 |
| POLR1B   | 1874  | 1798  | 1744  | 2781  | 2743  | 2674  | 1924  | 1828  | 1989  | 2424  | 2262  | 1.0 | 1.5 | 1.1 | 1.3 |
| AMD1     | 3631  | 3516  | 3435  | 4419  | 4699  | 4619  | 3620  | 3387  | 3724  | 4127  | 4358  | 1.0 | 1.3 | 1.0 | 1.2 |
| WDR43    | 3318  | 3284  | 3232  | 4064  | 3959  | 4123  | 3135  | 2945  | 3097  | 3621  | 3697  | 1.0 | 1.2 | 0.9 | 1.1 |
| MRT04    | 1648  | 1641  | 1631  | 2062  | 2038  | 2124  | 1656  | 1503  | 1547  | 1918  | 1974  | 1.0 | 1.3 | 1.0 | 1.2 |
| GPS2     | 4255  | 4082  | 4190  | 4834  | 4751  | 4840  | 4357  | 4031  | 4138  | 4502  | 4581  | 1.0 | 1.2 | 1.0 | 1.1 |
| KARS     | 7697  | 7520  | 7711  | 8857  | 8900  | 9025  | 7758  | 7448  | 7384  | 8155  | 8311  | 1.0 | 1.2 | 1.0 | 1.1 |
| POLR2A   | 6609  | 6434  | 6615  | 7118  | 7029  | 7097  | 6636  | 6502  | 6635  | 6765  | 6710  | 1.0 | 1.1 | 1.0 | 1.0 |
| AHCY     | 7531  | 7320  | 7592  | 9751  | 9672  | 9502  | 7447  | 7194  | 7590  | 8213  | 7992  | 1.0 | 1.3 | 1.0 | 1.1 |
| PLCD3    | 3813  | 3484  | 3787  | 4675  | 4348  | 4433  | 3659  | 3813  | 3802  | 4131  | 4078  | 1.0 | 1.2 | 1.0 | 1.1 |
| METTL1   | 806   | 733   | 762   | 988   | 976   | 985   | 749   | 740   | 806   | 856   | 899   | 1.0 | 1.3 | 1.0 | 1.1 |
| NBPF1    | 1809  | 1623  | 1662  | 2552  | 2343  | 2378  | 1622  | 1722  | 1692  | 1959  | 2130  | 1.0 | 1.4 | 1.0 | 1.2 |
| TIGD1    | 331   | 276   | 332   | 451   | 445   | 460   | 314   | 317   | 305   | 355   | 401   | 1.0 | 1.4 | 1.0 | 1.2 |
| GNL3     | 2040  | 1989  | 2004  | 2261  | 2352  | 2498  | 2054  | 2039  | 2065  | 2169  | 2275  | 1.0 | 1.2 | 1.0 | 1.1 |
| C10orf2  | 1671  | 1614  | 1553  | 2051  | 2125  | 2223  | 1566  | 1621  | 1634  | 1958  | 1902  | 1.0 | 1.3 | 1.0 | 1.2 |

|          |       |       |       |       |       |       |       |       |       |       |       |     |     |     |     |
|----------|-------|-------|-------|-------|-------|-------|-------|-------|-------|-------|-------|-----|-----|-----|-----|
| EIF5A    | 13481 | 13155 | 13211 | 15451 | 15307 | 15772 | 13321 | 13471 | 13624 | 14891 | 14875 | 1.0 | 1.2 | 1.0 | 1.1 |
| HNRNPDL  | 3727  | 3756  | 3625  | 4579  | 4504  | 4772  | 3780  | 3764  | 3959  | 4193  | 4196  | 1.0 | 1.2 | 1.0 | 1.1 |
| BOD1     | 2355  | 2467  | 2372  | 3870  | 3653  | 3858  | 2637  | 2710  | 2409  | 3141  | 3175  | 1.0 | 1.6 | 1.1 | 1.3 |
| ADORA1   | 107   | 113   | 132   | 1041  | 1028  | 1023  | 104   | 112   | 116   | 391   | 394   | 1.0 | 8.8 | 0.9 | 3.3 |
| SEMA3B   | 413   | 451   | 437   | 1400  | 1378  | 1404  | 406   | 502   | 465   | 829   | 824   | 1.0 | 3.2 | 1.1 | 1.9 |
| RIMS4    | 1325  | 1402  | 1310  | 3027  | 2827  | 2852  | 1424  | 1358  | 1430  | 2082  | 2032  | 1.0 | 2.2 | 1.0 | 1.5 |
| KCNK15   | 445   | 481   | 462   | 1111  | 1049  | 1074  | 518   | 510   | 469   | 794   | 722   | 1.0 | 2.3 | 1.1 | 1.6 |
| FREM2    | 898   | 919   | 1025  | 1970  | 2160  | 2046  | 1119  | 1012  | 1166  | 1247  | 1474  | 1.0 | 2.2 | 1.2 | 1.4 |
| TUBA1B   | 40282 | 40931 | 40741 | 44449 | 43775 | 45069 | 40569 | 40478 | 40888 | 41693 | 42719 | 1.0 | 1.1 | 1.0 | 1.0 |
| FAM57A   | 762   | 790   | 801   | 1110  | 990   | 1046  | 687   | 767   | 776   | 925   | 963   | 1.0 | 1.3 | 0.9 | 1.2 |
| RPF2     | 1099  | 1014  | 1089  | 1287  | 1320  | 1337  | 986   | 1025  | 1017  | 1250  | 1321  | 1.0 | 1.2 | 0.9 | 1.2 |
| TMEM120B | 2038  | 2002  | 2055  | 2678  | 2468  | 2533  | 1934  | 1896  | 1957  | 2546  | 2610  | 1.0 | 1.3 | 0.9 | 1.3 |
| SEPT9    | 12716 | 12666 | 13352 | 14318 | 13833 | 14359 | 12300 | 12280 | 11906 | 13895 | 13359 | 1.0 | 1.1 | 0.9 | 1.1 |
| CCT7     | 12385 | 12375 | 12284 | 13191 | 13162 | 13378 | 11937 | 12040 | 11783 | 13187 | 12824 | 1.0 | 1.1 | 1.0 | 1.1 |
| KRT19    | 64112 | 68055 | 63882 | 77160 | 75698 | 77675 | 62979 | 69425 | 64613 | 71158 | 70435 | 1.0 | 1.2 | 1.0 | 1.1 |
| TSR1     | 2274  | 2208  | 2355  | 2782  | 2882  | 2731  | 2112  | 2319  | 2085  | 2497  | 2593  | 1.0 | 1.2 | 1.0 | 1.1 |
| U2SURP   | 2783  | 2831  | 2833  | 3272  | 3399  | 3356  | 2680  | 2806  | 2635  | 3126  | 3015  | 1.0 | 1.2 | 1.0 | 1.1 |
| GOT2     | 2914  | 2995  | 3026  | 3296  | 3303  | 3206  | 2938  | 3040  | 2906  | 3146  | 3207  | 1.0 | 1.1 | 1.0 | 1.1 |
| NBPF10   | 1681  | 1723  | 1743  | 1889  | 2058  | 1923  | 1367  | 1369  | 1625  | 1793  | 1843  | 1.0 | 1.1 | 0.8 | 1.1 |
| XPOT     | 10452 | 10459 | 10395 | 12540 | 12753 | 12456 | 9351  | 9154  | 9222  | 10408 | 10888 | 1.0 | 1.2 | 0.9 | 1.0 |
| WDR74    | 1818  | 1840  | 1892  | 2257  | 2292  | 2281  | 1552  | 1504  | 1647  | 1815  | 1976  | 1.0 | 1.2 | 0.8 | 1.0 |
| PPRC1    | 2690  | 2595  | 2868  | 3199  | 3115  | 3185  | 2496  | 2357  | 2499  | 2658  | 2819  | 1.0 | 1.2 | 0.9 | 1.0 |
| DDX46    | 4098  | 4155  | 4076  | 4439  | 4463  | 4439  | 3788  | 3674  | 3972  | 3931  | 4223  | 1.0 | 1.1 | 0.9 | 1.0 |
| BCLAF1   | 6966  | 6896  | 7006  | 7427  | 7621  | 7315  | 6781  | 6636  | 7011  | 6883  | 7614  | 1.0 | 1.1 | 1.0 | 1.0 |
| MGA      | 1684  | 1678  | 1744  | 1880  | 2099  | 2025  | 1441  | 1298  | 1542  | 1554  | 1560  | 1.0 | 1.2 | 0.8 | 0.9 |
| WDR36    | 2016  | 1930  | 2019  | 2464  | 2615  | 2473  | 1586  | 1416  | 1609  | 1562  | 1744  | 1.0 | 1.3 | 0.8 | 0.8 |
| PPARGC1B | 327   | 328   | 399   | 418   | 564   | 526   | 242   | 209   | 229   | 251   | 237   | 1.0 | 1.4 | 0.6 | 0.7 |
| AMOTL1   | 659   | 573   | 623   | 762   | 755   | 743   | 397   | 342   | 419   | 371   | 369   | 1.0 | 1.2 | 0.6 | 0.6 |
| ACSS1    | 204   | 195   | 192   | 281   | 274   | 313   | 71    | 59    | 94    | 99    | 57    | 1.0 | 1.5 | 0.4 | 0.4 |
| AMPD2    | 2714  | 2699  | 2887  | 3443  | 3269  | 3333  | 2313  | 2207  | 2256  | 2329  | 2259  | 1.0 | 1.2 | 0.8 | 0.8 |
| PRDM6    | 293   | 291   | 328   | 396   | 387   | 420   | 253   | 191   | 246   | 245   | 236   | 1.0 | 1.3 | 0.8 | 0.8 |
| DUS1L    | 3839  | 3639  | 3813  | 4319  | 3989  | 4123  | 3276  | 3348  | 3354  | 3506  | 3430  | 1.0 | 1.1 | 0.9 | 0.9 |
| PISD     | 1664  | 1602  | 1699  | 1997  | 1828  | 1843  | 1344  | 1391  | 1398  | 1432  | 1464  | 1.0 | 1.1 | 0.8 | 0.9 |
| SLC46A1  | 1041  | 1015  | 985   | 1311  | 1242  | 1221  | 752   | 822   | 842   | 881   | 880   | 1.0 | 1.2 | 0.8 | 0.9 |
| SULT2B1  | 1210  | 1161  | 1232  | 1679  | 1483  | 1546  | 898   | 964   | 881   | 1048  | 1036  | 1.0 | 1.3 | 0.8 | 0.9 |
| ANKRD13B | 641   | 614   | 635   | 920   | 838   | 839   | 391   | 388   | 385   | 521   | 479   | 1.0 | 1.4 | 0.6 | 0.8 |
| SLC12A9  | 4954  | 5161  | 5086  | 5514  | 5503  | 5447  | 4374  | 4405  | 4264  | 4590  | 4249  | 1.0 | 1.1 | 0.9 | 0.9 |
| SLC25A39 | 11721 | 11778 | 11418 | 13262 | 12946 | 13010 | 10179 | 10234 | 10276 | 10767 | 10200 | 1.0 | 1.1 | 0.9 | 0.9 |
| NOP16    | 3185  | 3223  | 3110  | 3714  | 3665  | 3822  | 2573  | 2568  | 2589  | 2875  | 2675  | 1.0 | 1.2 | 0.8 | 0.9 |
| HAGHL    | 1319  | 1357  | 1284  | 1576  | 1551  | 1597  | 1059  | 1087  | 1064  | 1210  | 1121  | 1.0 | 1.2 | 0.8 | 0.9 |
| GGA2     | 3813  | 3787  | 3778  | 4277  | 4134  | 4087  | 3219  | 3536  | 3422  | 3536  | 3331  | 1.0 | 1.1 | 0.9 | 0.9 |
| SLC47A1  | 49    | 28    | 26    | 105   | 109   | 84    | 12    | 11    | 8     | 10    | 7     | 1.0 | 2.9 | 0.3 | 0.3 |
| SLC24A3  | 611   | 604   | 617   | 825   | 861   | 866   | 336   | 390   | 376   | 362   | 423   | 1.0 | 1.4 | 0.6 | 0.6 |
| PLXDC2   | 749   | 739   | 771   | 914   | 890   | 886   | 578   | 634   | 574   | 616   | 591   | 1.0 | 1.2 | 0.8 | 0.8 |
| G3BP1    | 8477  | 8619  | 8482  | 9528  | 9540  | 9628  | 6665  | 6458  | 6350  | 7044  | 7462  | 1.0 | 1.1 | 0.8 | 0.9 |
| MINA     | 1107  | 1177  | 1146  | 1374  | 1433  | 1418  | 782   | 743   | 776   | 883   | 934   | 1.0 | 1.2 | 0.7 | 0.8 |
| RRP12    | 2698  | 2847  | 2952  | 3279  | 3396  | 3507  | 1879  | 2010  | 1914  | 2285  | 2285  | 1.0 | 1.2 | 0.7 | 0.8 |
| LARP1    | 16462 | 16048 | 16632 | 17981 | 18664 | 18655 | 12469 | 12906 | 12421 | 13996 | 13869 | 1.0 | 1.1 | 0.8 | 0.9 |
| SLC3A2   | 5662  | 5881  | 5936  | 6657  | 6850  | 7019  | 4147  | 3985  | 4047  | 4862  | 4707  | 1.0 | 1.2 | 0.7 | 0.8 |
| RAN      | 19580 | 20024 | 19255 | 21475 | 21989 | 22009 | 16265 | 16023 | 16316 | 17267 | 17000 | 1.0 | 1.1 | 0.8 | 0.9 |
| PGAM5    | 3874  | 3875  | 4016  | 4345  | 4288  | 4219  | 2898  | 2839  | 2921  | 3201  | 3211  | 1.0 | 1.1 | 0.7 | 0.8 |
| HSPA4    | 8409  | 8155  | 8095  | 9174  | 9185  | 9042  | 4935  | 4888  | 4996  | 5628  | 5665  | 1.0 | 1.1 | 0.6 | 0.7 |
| NAT8L    | 1714  | 1718  | 1778  | 1908  | 2046  | 1942  | 926   | 899   | 941   | 1194  | 1058  | 1.0 | 1.1 | 0.5 | 0.6 |
| DHX37    | 2273  | 2170  | 2432  | 2632  | 2691  | 2700  | 1315  | 1354  | 1368  | 1560  | 1478  | 1.0 | 1.2 | 0.6 | 0.7 |
| YARS     | 2706  | 2701  | 2704  | 2981  | 2887  | 3059  | 1927  | 1995  | 1968  | 2141  | 2255  | 1.0 | 1.1 | 0.7 | 0.8 |
| LRRC59   | 9725  | 9718  | 9841  | 10276 | 10304 | 10387 | 8179  | 7840  | 8014  | 8345  | 8488  | 1.0 | 1.1 | 0.8 | 0.9 |
| JAK1     | 8642  | 8265  | 8631  | 9591  | 9652  | 9549  | 6307  | 5956  | 6122  | 6660  | 7031  | 1.0 | 1.1 | 0.7 | 0.8 |
| COL12A1  | 9699  | 10186 | 10718 | 12831 | 14077 | 13879 | 5187  | 4837  | 5475  | 5865  | 6499  | 1.0 | 1.3 | 0.5 | 0.6 |
| ATAD3B   | 607   | 591   | 657   | 766   | 751   | 745   | 431   | 415   | 451   | 529   | 478   | 1.0 | 1.2 | 0.7 | 0.8 |
| RCN1     | 956   | 865   | 973   | 1132  | 1147  | 1176  | 618   | 598   | 677   | 736   | 743   | 1.0 | 1.2 | 0.7 | 0.8 |
| C3orf58  | 1274  | 1337  | 1347  | 1599  | 1571  | 1437  | 982   | 931   | 1041  | 1071  | 1096  | 1.0 | 1.2 | 0.7 | 0.8 |
| ARRDC3   | 829   | 805   | 843   | 1000  | 937   | 987   | 615   | 543   | 523   | 615   | 637   | 1.0 | 1.2 | 0.7 | 0.8 |
| MTHFD1L  | 2507  | 2474  | 2428  | 2838  | 2790  | 2878  | 1782  | 1687  | 1599  | 2019  | 2034  | 1.0 | 1.1 | 0.7 | 0.8 |
| DDX42    | 7077  | 6683  | 6642  | 7668  | 7502  | 7557  | 5879  | 5527  | 5602  | 6342  | 6002  | 1.0 | 1.1 | 0.8 | 0.9 |
| PPM1G    | 8164  | 7672  | 7830  | 8646  | 8437  | 8485  | 6879  | 6476  | 6716  | 7230  | 7232  | 1.0 | 1.1 | 0.8 | 0.9 |
| PSME3    | 4723  | 4411  | 4423  | 5015  | 5149  | 5134  | 3893  | 3769  | 3747  | 4072  | 4043  | 1.0 | 1.1 | 0.8 | 0.9 |

|           |       |       |       |       |       |       |       |       |       |       |       |     |     |     |     |
|-----------|-------|-------|-------|-------|-------|-------|-------|-------|-------|-------|-------|-----|-----|-----|-----|
| RHOBTB3   | 4945  | 4912  | 4616  | 5653  | 5362  | 5092  | 3310  | 3329  | 3176  | 3271  | 3717  | 1.0 | 1.1 | 0.7 | 0.7 |
| SLC38A2   | 26420 | 26149 | 26308 | 27712 | 27565 | 27523 | 15274 | 15121 | 15239 | 16261 | 16401 | 1.0 | 1.0 | 0.6 | 0.6 |
| ODC1      | 2595  | 2692  | 2584  | 2972  | 2960  | 3200  | 1293  | 1259  | 1246  | 1262  | 1325  | 1.0 | 1.2 | 0.5 | 0.5 |
| COL18A1   | 14371 | 15190 | 15611 | 16588 | 15796 | 16669 | 10697 | 10760 | 11004 | 11385 | 10949 | 1.0 | 1.1 | 0.7 | 0.7 |
| CS        | 9103  | 8921  | 9175  | 9821  | 9535  | 9558  | 7646  | 7722  | 7480  | 7806  | 7589  | 1.0 | 1.1 | 0.8 | 0.8 |
| RPS26     | 7178  | 7071  | 7209  | 7784  | 7666  | 7657  | 5722  | 5756  | 5560  | 5673  | 5652  | 1.0 | 1.1 | 0.8 | 0.8 |
| KPNB1     | 13103 | 13038 | 12895 | 13777 | 13966 | 13916 | 11126 | 10674 | 10573 | 11125 | 10943 | 1.0 | 1.1 | 0.8 | 0.8 |
| TAF9      | 1728  | 1698  | 1641  | 1854  | 1887  | 1974  | 1147  | 1214  | 1175  | 1197  | 1196  | 1.0 | 1.1 | 0.7 | 0.7 |
| EIF4B     | 25469 | 26885 | 25680 | 28851 | 27848 | 28192 | 25020 | 25187 | 25225 | 24674 | 25114 | 1.0 | 1.1 | 1.0 | 1.0 |
| KCNJ8     | 87    | 112   | 84    | 152   | 135   | 165   | 75    | 72    | 64    | 56    | 60    | 1.0 | 1.6 | 0.7 | 0.6 |
| SLC38A1   | 15858 | 15699 | 15522 | 16423 | 16730 | 16909 | 15110 | 15301 | 15619 | 15291 | 15297 | 1.0 | 1.1 | 1.0 | 1.0 |
| TMEM186   | 1902  | 1816  | 1942  | 2520  | 2617  | 2774  | 1691  | 1766  | 1788  | 1935  | 1964  | 1.0 | 1.4 | 0.9 | 1.0 |
| PCYOX1L   | 562   | 563   | 566   | 797   | 810   | 877   | 469   | 476   | 494   | 547   | 593   | 1.0 | 1.5 | 0.9 | 1.0 |
| NRCAM     | 10862 | 11092 | 11136 | 12345 | 12135 | 12074 | 10677 | 10735 | 10640 | 10748 | 11041 | 1.0 | 1.1 | 1.0 | 1.0 |
| INHBB     | 3162  | 3154  | 3171  | 4412  | 4385  | 4438  | 2896  | 2836  | 2897  | 2937  | 3056  | 1.0 | 1.4 | 0.9 | 0.9 |
| ZNF552    | 169   | 163   | 182   | 250   | 280   | 234   | 164   | 162   | 145   | 170   | 190   | 1.0 | 1.5 | 0.9 | 1.0 |
| C14orf132 | 760   | 877   | 837   | 1103  | 1102  | 1106  | 687   | 792   | 677   | 850   | 862   | 1.0 | 1.3 | 0.9 | 1.0 |
| NME1      | 2000  | 2114  | 2100  | 2639  | 2645  | 2579  | 1898  | 1948  | 1911  | 2153  | 2268  | 1.0 | 1.3 | 0.9 | 1.1 |
| YTHDF1    | 6289  | 6453  | 6260  | 6831  | 6811  | 6907  | 6124  | 6151  | 6034  | 6334  | 6534  | 1.0 | 1.1 | 1.0 | 1.0 |
| CYP2U1    | 403   | 350   | 374   | 509   | 468   | 460   | 312   | 371   | 312   | 327   | 396   | 1.0 | 1.3 | 0.9 | 1.0 |
| CHCHD4    | 485   | 453   | 451   | 600   | 567   | 584   | 430   | 457   | 432   | 462   | 527   | 1.0 | 1.3 | 0.9 | 1.1 |
| SMG7      | 8286  | 7658  | 8159  | 8577  | 8707  | 8770  | 7491  | 7337  | 7339  | 7950  | 7953  | 1.0 | 1.1 | 0.9 | 1.0 |
| CAP2      | 981   | 862   | 933   | 1117  | 1140  | 1161  | 744   | 656   | 739   | 845   | 900   | 1.0 | 1.2 | 0.8 | 0.9 |
| KCTD17    | 734   | 649   | 723   | 873   | 811   | 848   | 605   | 542   | 612   | 721   | 618   | 1.0 | 1.2 | 0.8 | 1.0 |
| UBAP2L    | 11135 | 10549 | 11079 | 11967 | 12026 | 11862 | 10547 | 10187 | 10016 | 10706 | 10678 | 1.0 | 1.1 | 0.9 | 1.0 |
| HSP90AB1  | 72722 | 70800 | 73298 | 78122 | 79650 | 79971 | 69130 | 65933 | 67128 | 70730 | 71412 | 1.0 | 1.1 | 0.9 | 1.0 |
| EFTUD2    | 3104  | 3067  | 3171  | 3643  | 3553  | 3544  | 2978  | 2888  | 2773  | 2944  | 3017  | 1.0 | 1.1 | 0.9 | 1.0 |
| SKIV2L2   | 1673  | 1676  | 1728  | 2113  | 2107  | 1986  | 1501  | 1415  | 1342  | 1495  | 1600  | 1.0 | 1.2 | 0.8 | 0.9 |
| SLC19A1   | 6111  | 5854  | 6142  | 7323  | 6995  | 7130  | 5726  | 5552  | 5359  | 5948  | 5747  | 1.0 | 1.2 | 0.9 | 1.0 |
| SCARB1    | 2851  | 2721  | 2771  | 4377  | 4312  | 4120  | 2256  | 2296  | 2126  | 2709  | 2674  | 1.0 | 1.5 | 0.8 | 1.0 |
| PYCR1     | 3484  | 3298  | 3434  | 4075  | 4100  | 4047  | 2957  | 2935  | 2838  | 3486  | 3236  | 1.0 | 1.2 | 0.9 | 1.0 |
| ABAT      | 24066 | 22900 | 24507 | 35944 | 34864 | 35076 | 19043 | 18552 | 18803 | 23924 | 23373 | 1.0 | 1.5 | 0.8 | 1.0 |
| GEMIN5    | 2384  | 2316  | 2401  | 3231  | 3277  | 3287  | 1885  | 1822  | 1926  | 2320  | 2280  | 1.0 | 1.4 | 0.8 | 1.0 |
| MYBBP1A   | 2809  | 2907  | 2901  | 3656  | 3570  | 3680  | 2410  | 2408  | 2380  | 2907  | 2744  | 1.0 | 1.3 | 0.8 | 1.0 |
| XYLT2     | 1164  | 1188  | 1216  | 1414  | 1432  | 1466  | 1103  | 1020  | 1089  | 1195  | 1132  | 1.0 | 1.2 | 0.9 | 1.0 |
| AK2       | 2438  | 2281  | 2212  | 2627  | 2951  | 2773  | 2077  | 2065  | 2036  | 2221  | 2266  | 1.0 | 1.2 | 0.9 | 1.0 |
| MCCC2     | 3369  | 3266  | 3157  | 4206  | 3915  | 4205  | 2485  | 2485  | 2477  | 2768  | 2945  | 1.0 | 1.3 | 0.8 | 0.9 |
| NPM1      | 48087 | 46914 | 46321 | 57635 | 57700 | 58156 | 40225 | 39640 | 39024 | 43741 | 45438 | 1.0 | 1.2 | 0.8 | 0.9 |
| LRPPRC    | 8891  | 8882  | 8639  | 10287 | 10240 | 10345 | 7811  | 7349  | 7482  | 8135  | 8204  | 1.0 | 1.2 | 0.9 | 0.9 |
| RHOA      | 536   | 562   | 558   | 905   | 910   | 823   | 365   | 351   | 358   | 409   | 429   | 1.0 | 1.6 | 0.6 | 0.8 |
| KRT13     | 111   | 138   | 165   | 1291  | 1268  | 1145  | 18    | 33    | 18    | 64    | 64    | 1.0 | 8.9 | 0.2 | 0.5 |
| LSG1      | 3400  | 3330  | 3261  | 3946  | 3938  | 3847  | 3122  | 2860  | 2980  | 3212  | 3173  | 1.0 | 1.2 | 0.9 | 1.0 |
| CHDH      | 890   | 841   | 839   | 1105  | 1113  | 1010  | 715   | 690   | 689   | 791   | 810   | 1.0 | 1.3 | 0.8 | 0.9 |
| CPXM2     | 35    | 31    | 28    | 150   | 120   | 87    | 6     | 2     | 8     | 25    | 25    | 1.0 | 3.8 | 0.2 | 0.8 |
| DDX49     | 2004  | 1951  | 1911  | 2301  | 2373  | 2311  | 1729  | 1631  | 1724  | 1905  | 1906  | 1.0 | 1.2 | 0.9 | 1.0 |
| SRSF1     | 14423 | 14011 | 13980 | 16308 | 16302 | 15565 | 13418 | 13207 | 13218 | 14142 | 14747 | 1.0 | 1.1 | 0.9 | 1.0 |
| BMS1      | 3815  | 3827  | 3789  | 4144  | 4128  | 4107  | 3742  | 3597  | 3612  | 3850  | 3938  | 1.0 | 1.1 | 1.0 | 1.0 |
| PA2G4     | 5383  | 4823  | 5097  | 6732  | 7128  | 6823  | 4836  | 4517  | 4405  | 5517  | 5521  | 1.0 | 1.4 | 0.9 | 1.1 |
| TOMM40    | 4626  | 4534  | 4720  | 5515  | 5378  | 5398  | 4232  | 4248  | 3880  | 4751  | 4904  | 1.0 | 1.2 | 0.9 | 1.0 |
| NOC2L     | 5052  | 4998  | 5087  | 5768  | 5783  | 5805  | 4567  | 4782  | 4467  | 5283  | 5346  | 1.0 | 1.1 | 0.9 | 1.1 |
| NLN       | 1509  | 1505  | 1416  | 1659  | 1754  | 1764  | 1288  | 1271  | 1214  | 1477  | 1530  | 1.0 | 1.2 | 0.9 | 1.0 |
| ZNF239    | 215   | 156   | 198   | 273   | 315   | 261   | 172   | 147   | 153   | 155   | 206   | 1.0 | 1.5 | 0.8 | 1.0 |
| PNN       | 4543  | 4207  | 4596  | 4972  | 4991  | 4954  | 4375  | 4095  | 4294  | 4375  | 4462  | 1.0 | 1.1 | 1.0 | 1.0 |
| SNHG17    | 405   | 418   | 384   | 494   | 481   | 553   | 307   | 290   | 264   | 369   | 315   | 1.0 | 1.3 | 0.7 | 0.8 |
| C14orf79  | 1089  | 1082  | 1005  | 1247  | 1243  | 1366  | 993   | 937   | 948   | 1085  | 1006  | 1.0 | 1.2 | 0.9 | 1.0 |
| C1orf233  | 1222  | 1186  | 1087  | 1444  | 1357  | 1583  | 1022  | 1032  | 974   | 1094  | 1059  | 1.0 | 1.3 | 0.9 | 0.9 |
| SF1       | 9336  | 8908  | 9316  | 9972  | 9512  | 10185 | 8669  | 8728  | 8595  | 9147  | 8759  | 1.0 | 1.1 | 0.9 | 1.0 |
| PRKAR1B   | 2233  | 2245  | 2285  | 2728  | 2414  | 2603  | 2098  | 2085  | 2018  | 2204  | 2076  | 1.0 | 1.1 | 0.9 | 0.9 |
| E2F4      | 2852  | 2984  | 2906  | 3222  | 3233  | 3365  | 2874  | 2669  | 2690  | 3069  | 2849  | 1.0 | 1.1 | 0.9 | 1.0 |
| KRT15     | 204   | 214   | 176   | 431   | 363   | 412   | 154   | 166   | 148   | 239   | 180   | 1.0 | 2.0 | 0.8 | 1.1 |
| ARMC6     | 1595  | 1623  | 1491  | 1883  | 1836  | 1904  | 1426  | 1407  | 1348  | 1731  | 1562  | 1.0 | 1.2 | 0.9 | 1.0 |
| SMPD2     | 424   | 447   | 454   | 549   | 568   | 549   | 378   | 420   | 389   | 457   | 398   | 1.0 | 1.3 | 0.9 | 1.0 |
| ANKRD16   | 289   | 294   | 313   | 387   | 400   | 387   | 232   | 271   | 260   | 301   | 255   | 1.0 | 1.3 | 0.9 | 0.9 |
| ISG20     | 262   | 219   | 261   | 345   | 430   | 392   | 152   | 223   | 185   | 256   | 224   | 1.0 | 1.6 | 0.8 | 1.0 |
| KMO       | 244   | 242   | 268   | 339   | 404   | 338   | 183   | 202   | 191   | 243   | 214   | 1.0 | 1.4 | 0.8 | 0.9 |
| URB1      | 2990  | 2907  | 3150  | 3361  | 3701  | 3380  | 2611  | 2682  | 2742  | 2983  | 2824  | 1.0 | 1.2 | 0.9 | 1.0 |

|           |       |       |       |       |       |       |       |       |       |       |       |     |     |     |     |
|-----------|-------|-------|-------|-------|-------|-------|-------|-------|-------|-------|-------|-----|-----|-----|-----|
| IRS2      | 206   | 249   | 234   | 337   | 290   | 333   | 159   | 201   | 160   | 217   | 194   | 1.0 | 1.4 | 0.8 | 0.9 |
| FAM207A   | 1692  | 1953  | 1968  | 2310  | 2206  | 2216  | 1419  | 1600  | 1538  | 1878  | 1744  | 1.0 | 1.2 | 0.8 | 1.0 |
| MANEAL    | 1737  | 1666  | 1735  | 2227  | 2237  | 2246  | 1208  | 1358  | 1223  | 1642  | 1649  | 1.0 | 1.3 | 0.7 | 1.0 |
| SLC22A5   | 1238  | 1119  | 1237  | 1671  | 1576  | 1588  | 722   | 784   | 736   | 1036  | 1067  | 1.0 | 1.3 | 0.6 | 0.9 |
| C16orf45  | 1490  | 1497  | 1532  | 1870  | 1721  | 1769  | 1004  | 1071  | 1056  | 1408  | 1413  | 1.0 | 1.2 | 0.7 | 0.9 |
| APRT      | 9111  | 8922  | 8850  | 9847  | 9522  | 9743  | 8397  | 8441  | 8266  | 9058  | 8970  | 1.0 | 1.1 | 0.9 | 1.0 |
| CBFA2T3   | 3428  | 3354  | 3489  | 4139  | 3845  | 3981  | 2923  | 3016  | 3096  | 3487  | 3492  | 1.0 | 1.2 | 0.9 | 1.0 |
| SDAD1     | 2195  | 2212  | 2171  | 2502  | 2540  | 2591  | 1877  | 1868  | 1974  | 2177  | 2112  | 1.0 | 1.2 | 0.9 | 1.0 |
| HNRNPAB   | 14868 | 15301 | 15043 | 16334 | 16536 | 16603 | 13069 | 13240 | 13573 | 14579 | 14193 | 1.0 | 1.1 | 0.9 | 1.0 |
| MATK      | 369   | 401   | 422   | 652   | 677   | 626   | 223   | 252   | 254   | 370   | 374   | 1.0 | 1.6 | 0.6 | 0.9 |
| ATAD3A    | 1324  | 1406  | 1353  | 1594  | 1645  | 1626  | 1095  | 1074  | 1110  | 1375  | 1184  | 1.0 | 1.2 | 0.8 | 0.9 |
| AIMP2     | 1624  | 1717  | 1570  | 1934  | 1941  | 1916  | 1325  | 1394  | 1408  | 1695  | 1523  | 1.0 | 1.2 | 0.8 | 1.0 |
| FAM208B   | 6658  | 6546  | 7023  | 7254  | 7979  | 7490  | 5625  | 5511  | 5631  | 6011  | 6413  | 1.0 | 1.1 | 0.8 | 0.9 |
| MACF1     | 2605  | 2567  | 2541  | 2778  | 3231  | 2998  | 1738  | 1949  | 2005  | 2133  | 2340  | 1.0 | 1.2 | 0.7 | 0.9 |
| EBNA1BP2  | 2576  | 2499  | 2503  | 2783  | 2923  | 2861  | 2053  | 2145  | 2135  | 2451  | 2399  | 1.0 | 1.1 | 0.8 | 1.0 |
| C15orf48  | 101   | 89    | 76    | 151   | 158   | 143   | 31    | 33    | 33    | 66    | 56    | 1.0 | 1.7 | 0.4 | 0.7 |
| ARL10     | 615   | 627   | 662   | 777   | 814   | 794   | 474   | 502   | 469   | 562   | 552   | 1.0 | 1.3 | 0.8 | 0.9 |
| CCDC137   | 1663  | 1671  | 1715  | 1915  | 2008  | 1892  | 1353  | 1364  | 1357  | 1539  | 1531  | 1.0 | 1.2 | 0.8 | 0.9 |
| PUS1      | 1613  | 1669  | 1699  | 2073  | 2125  | 2013  | 1268  | 1296  | 1228  | 1579  | 1473  | 1.0 | 1.2 | 0.8 | 0.9 |
| SRSF2     | 9203  | 9467  | 9350  | 10100 | 10110 | 10591 | 7717  | 7346  | 7805  | 8719  | 8750  | 1.0 | 1.1 | 0.8 | 0.9 |
| NKAIN1    | 150   | 206   | 195   | 317   | 304   | 297   | 108   | 96    | 94    | 189   | 191   | 1.0 | 1.7 | 0.5 | 1.0 |
| TLN2      | 430   | 438   | 466   | 655   | 674   | 604   | 373   | 286   | 305   | 408   | 417   | 1.0 | 1.4 | 0.7 | 0.9 |
| TGIF2     | 2156  | 2134  | 2237  | 2730  | 2543  | 2552  | 1856  | 1580  | 1731  | 2065  | 2091  | 1.0 | 1.2 | 0.8 | 1.0 |
| THOC7     | 6112  | 6392  | 6073  | 6604  | 6864  | 6883  | 5889  | 5572  | 5378  | 5777  | 6107  | 1.0 | 1.1 | 0.9 | 1.0 |
| PRSS23    | 10179 | 9846  | 10010 | 10787 | 10905 | 10461 | 6662  | 6351  | 6643  | 9681  | 9693  | 1.0 | 1.1 | 0.7 | 1.0 |
| NOP14-AS1 | 2813  | 2588  | 2651  | 2925  | 2950  | 3031  | 1961  | 2004  | 1774  | 2543  | 2513  | 1.0 | 1.1 | 0.7 | 0.9 |
| LRRN2     | 219   | 202   | 183   | 272   | 308   | 277   | 87    | 77    | 68    | 166   | 152   | 1.0 | 1.4 | 0.4 | 0.8 |
| STRAP     | 6364  | 6130  | 6199  | 6761  | 6877  | 6688  | 5444  | 5413  | 5112  | 6094  | 5848  | 1.0 | 1.1 | 0.9 | 1.0 |
| GTPBP4    | 5638  | 5576  | 5476  | 5820  | 6115  | 6173  | 5030  | 4905  | 5051  | 5841  | 5584  | 1.0 | 1.1 | 0.9 | 1.0 |

**CLUSTER 3**

| Gene     | Normalised Expression |       |       |          |       |       |         |       |       |          |       | Mean Expression Difference |          |         |          |
|----------|-----------------------|-------|-------|----------|-------|-------|---------|-------|-------|----------|-------|----------------------------|----------|---------|----------|
|          | MCF7                  |       |       |          |       |       | Y537S   |       |       |          |       | MCF7                       |          | Y537S   |          |
|          | Vehicle               |       |       | Estrogen |       |       | Vehicle |       |       | Estrogen |       | Vehicle                    | Estrogen | Vehicle | Estrogen |
|          | 1                     | 2     | 3     | 1        | 2     | 3     | 1       | 2     | 3     | 1        | 2     |                            |          |         |          |
| MAP3K6   | 1067                  | 1010  | 1047  | 859      | 882   | 826   | 1071    | 991   | 1155  | 1080     | 995   | 1.0                        | 0.8      | 1.0     | 1.0      |
| DNAL1    | 619                   | 590   | 644   | 505      | 554   | 484   | 587     | 564   | 632   | 646      | 576   | 1.0                        | 0.8      | 1.0     | 1.0      |
| IL10RB   | 382                   | 352   | 413   | 326      | 300   | 319   | 435     | 356   | 398   | 430      | 397   | 1.0                        | 0.8      | 1.0     | 1.1      |
| RAB8B    | 922                   | 886   | 852   | 720      | 705   | 743   | 951     | 985   | 937   | 898      | 894   | 1.0                        | 0.8      | 1.1     | 1.0      |
| EDEM1    | 1508                  | 1521  | 1385  | 1037     | 1047  | 1094  | 1645    | 1650  | 1494  | 1498     | 1430  | 1.0                        | 0.7      | 1.1     | 1.0      |
| SEMA4C   | 4982                  | 4948  | 4952  | 4058     | 3888  | 3916  | 5143    | 5406  | 5143  | 5031     | 4991  | 1.0                        | 0.8      | 1.1     | 1.0      |
| SGPL1    | 4985                  | 5026  | 5087  | 4165     | 4151  | 4254  | 5389    | 5354  | 5453  | 5001     | 4913  | 1.0                        | 0.8      | 1.1     | 1.0      |
| GTF2IRD1 | 2110                  | 2187  | 2185  | 1570     | 1513  | 1565  | 2407    | 2471  | 2395  | 2232     | 2136  | 1.0                        | 0.7      | 1.1     | 1.0      |
| LMNA     | 15595                 | 16094 | 16072 | 13211    | 13227 | 13275 | 16335   | 16708 | 16527 | 15669    | 15560 | 1.0                        | 0.8      | 1.0     | 1.0      |
| CAPN1    | 11052                 | 10740 | 10920 | 9043     | 8961  | 8991  | 11629   | 11746 | 11379 | 10921    | 10279 | 1.0                        | 0.8      | 1.1     | 1.0      |
| ARHGEF16 | 994                   | 1055  | 1045  | 823      | 818   | 878   | 1168    | 1138  | 1057  | 1073     | 1037  | 1.0                        | 0.8      | 1.1     | 1.0      |
| TMEM41B  | 1147                  | 1154  | 1125  | 773      | 835   | 840   | 1288    | 1277  | 1192  | 1196     | 1193  | 1.0                        | 0.7      | 1.1     | 1.0      |
| ERRFI1   | 5114                  | 5231  | 5145  | 2914     | 3182  | 3305  | 5616    | 6099  | 5425  | 5862     | 6070  | 1.0                        | 0.6      | 1.1     | 1.2      |
| MAFF     | 407                   | 428   | 397   | 263      | 279   | 245   | 467     | 470   | 453   | 459      | 465   | 1.0                        | 0.6      | 1.1     | 1.1      |
| KLF6     | 4222                  | 4448  | 4419  | 2976     | 2873  | 3195  | 4552    | 4470  | 4675  | 4711     | 4320  | 1.0                        | 0.7      | 1.0     | 1.0      |
| LDLR     | 6553                  | 6344  | 6855  | 5078     | 5192  | 5350  | 7017    | 7102  | 7096  | 6898     | 7025  | 1.0                        | 0.8      | 1.1     | 1.1      |
| ARHGAP32 | 1286                  | 1266  | 1300  | 1142     | 1031  | 1108  | 1328    | 1372  | 1379  | 1333     | 1307  | 1.0                        | 0.9      | 1.1     | 1.0      |
| GJB3     | 196                   | 168   | 176   | 133      | 118   | 119   | 208     | 195   | 212   | 210      | 200   | 1.0                        | 0.7      | 1.1     | 1.1      |
| INO80C   | 589                   | 561   | 528   | 461      | 481   | 439   | 676     | 584   | 615   | 629      | 588   | 1.0                        | 0.8      | 1.1     | 1.1      |
| ACOX1    | 4578                  | 4621  | 4549  | 3686     | 3810  | 3876  | 5272    | 5139  | 5380  | 4799     | 4712  | 1.0                        | 0.8      | 1.1     | 1.0      |
| CLDN4    | 12043                 | 12357 | 12058 | 8521     | 8727  | 9043  | 15668   | 16389 | 16426 | 14125    | 13335 | 1.0                        | 0.7      | 1.3     | 1.1      |
| ALAS1    | 984                   | 978   | 957   | 722      | 800   | 804   | 1103    | 1141  | 1223  | 1085     | 1010  | 1.0                        | 0.8      | 1.2     | 1.1      |
| GDPD3    | 179                   | 159   | 158   | 119      | 116   | 133   | 215     | 189   | 214   | 188      | 159   | 1.0                        | 0.7      | 1.2     | 1.0      |
| KANK2    | 5025                  | 5101  | 5072  | 4247     | 4137  | 4038  | 5774    | 5886  | 5785  | 5529     | 5361  | 1.0                        | 0.8      | 1.1     | 1.1      |
| CRABP2   | 14725                 | 14630 | 14809 | 12056    | 12080 | 12246 | 16700   | 17342 | 16334 | 16018    | 15595 | 1.0                        | 0.8      | 1.1     | 1.1      |
| TMUB1    | 1761                  | 1762  | 1751  | 1484     | 1401  | 1486  | 2035    | 2203  | 2017  | 2042     | 1782  | 1.0                        | 0.8      | 1.2     | 1.1      |
| RAB27B   | 3715                  | 3824  | 3606  | 2417     | 2586  | 2575  | 4857    | 5168  | 4727  | 3965     | 4129  | 1.0                        | 0.7      | 1.3     | 1.1      |
| SPTSSB   | 78910                 | 80245 | 75627 | 64219    | 65231 | 63470 | 90299   | 89861 | 89165 | 79440    | 81746 | 1.0                        | 0.8      | 1.1     | 1.0      |
| SCCPDH   | 6384                  | 6637  | 5998  | 5075     | 4967  | 5045  | 8503    | 8413  | 8364  | 7092     | 7504  | 1.0                        | 0.8      | 1.3     | 1.2      |
| B4GALT4  | 2111                  | 2059  | 2101  | 1609     | 1548  | 1548  | 2797    | 3005  | 2821  | 2415     | 2412  | 1.0                        | 0.8      | 1.4     | 1.2      |
| APOBEC3B | 144                   | 168   | 162   | 94       | 108   | 102   | 266     | 256   | 294   | 166      | 174   | 1.0                        | 0.6      | 1.7     | 1.1      |
| PLEKHG6  | 281                   | 294   | 279   | 210      | 243   | 232   | 387     | 357   | 410   | 316      | 305   | 1.0                        | 0.8      | 1.4     | 1.1      |

|          |       |       |       |       |       |       |       |        |       |       |       |     |     |     |     |
|----------|-------|-------|-------|-------|-------|-------|-------|--------|-------|-------|-------|-----|-----|-----|-----|
| EMP1     | 128   | 204   | 150   | 91    | 101   | 135   | 283   | 273    | 315   | 224   | 194   | 1.0 | 0.7 | 1.8 | 1.3 |
| YPEL3    | 1145  | 1232  | 1219  | 959   | 815   | 983   | 1477  | 1442   | 1470  | 1072  | 1131  | 1.0 | 0.8 | 1.2 | 0.9 |
| ATP2A3   | 4678  | 4828  | 4970  | 4346  | 3785  | 4142  | 5639  | 5724   | 5548  | 4697  | 4554  | 1.0 | 0.8 | 1.2 | 1.0 |
| CABLES2  | 1227  | 1206  | 1219  | 976   | 930   | 935   | 1412  | 1457   | 1539  | 1239  | 1241  | 1.0 | 0.8 | 1.2 | 1.0 |
| HPS3     | 5419  | 5147  | 5478  | 4244  | 4293  | 4110  | 7416  | 7230   | 7600  | 5265  | 5479  | 1.0 | 0.8 | 1.4 | 1.0 |
| CP       | 1032  | 1015  | 990   | 774   | 742   | 752   | 1460  | 1459   | 1414  | 1010  | 1128  | 1.0 | 0.7 | 1.4 | 1.1 |
| SLC44A2  | 8671  | 8674  | 8539  | 7226  | 7186  | 7280  | 10332 | 10131  | 10231 | 8749  | 8780  | 1.0 | 0.8 | 1.2 | 1.0 |
| CCNG2    | 2694  | 2820  | 2882  | 2215  | 2258  | 2155  | 3420  | 3544   | 3365  | 2719  | 2705  | 1.0 | 0.8 | 1.2 | 1.0 |
| IDI2-AS1 | 858   | 827   | 836   | 729   | 697   | 668   | 1132  | 1142   | 1081  | 1020  | 1090  | 1.0 | 0.8 | 1.3 | 1.3 |
| PPARG    | 926   | 792   | 828   | 609   | 625   | 619   | 1576  | 1493   | 1485  | 1250  | 1479  | 1.0 | 0.7 | 1.8 | 1.6 |
| S100A16  | 11792 | 11075 | 11324 | 8915  | 8941  | 9019  | 16898 | 17689  | 16220 | 16181 | 16019 | 1.0 | 0.8 | 1.5 | 1.4 |
| RTKN2    | 648   | 678   | 660   | 473   | 480   | 475   | 1224  | 1293   | 1139  | 1273  | 1287  | 1.0 | 0.7 | 1.8 | 1.9 |
| NR4A1    | 1849  | 2024  | 1968  | 1346  | 1245  | 1301  | 4393  | 4612   | 4446  | 3912  | 3866  | 1.0 | 0.7 | 2.3 | 2.0 |
| CDC42EP4 | 1187  | 1203  | 1276  | 1064  | 989   | 1008  | 1931  | 1946   | 1837  | 1834  | 1763  | 1.0 | 0.8 | 1.6 | 1.5 |
| TC2N     | 1271  | 1214  | 1323  | 1016  | 975   | 1049  | 2549  | 2637   | 2081  | 2168  | 2252  | 1.0 | 0.8 | 1.9 | 1.7 |
| CCNF     | 1182  | 1233  | 1210  | 925   | 1057  | 1010  | 1904  | 1798   | 1921  | 1892  | 1909  | 1.0 | 0.8 | 1.6 | 1.6 |
| CEP70    | 196   | 264   | 222   | 162   | 180   | 185   | 448   | 389    | 429   | 392   | 389   | 1.0 | 0.8 | 1.9 | 1.7 |
| PKP1     | 944   | 914   | 1044  | 718   | 798   | 720   | 1896  | 2086   | 2000  | 1753  | 1650  | 1.0 | 0.8 | 2.1 | 1.8 |
| KIAA1217 | 889   | 832   | 883   | 712   | 744   | 693   | 1378  | 1492   | 1443  | 1265  | 1334  | 1.0 | 0.8 | 1.7 | 1.5 |
| KRT83    | 210   | 218   | 185   | 117   | 173   | 99    | 1337  | 1578   | 1391  | 896   | 959   | 1.0 | 0.6 | 7.0 | 4.5 |
| NYNRIN   | 230   | 273   | 244   | 205   | 181   | 204   | 1101  | 984    | 1029  | 885   | 817   | 1.0 | 0.8 | 4.2 | 3.4 |
| CLSTN2   | 1103  | 1113  | 1144  | 904   | 926   | 950   | 4275  | 4482   | 4249  | 3501  | 3879  | 1.0 | 0.8 | 3.9 | 3.3 |
| S100P    | 951   | 914   | 880   | 751   | 779   | 763   | 4917  | 5500   | 4991  | 4640  | 4572  | 1.0 | 0.8 | 5.6 | 5.0 |
| TNFRSF1A | 2893  | 2796  | 2789  | 2411  | 2323  | 2309  | 4835  | 5036   | 4724  | 4893  | 5027  | 1.0 | 0.8 | 1.7 | 1.8 |
| CAPS     | 921   | 865   | 861   | 737   | 683   | 664   | 2767  | 3262   | 2996  | 2824  | 2774  | 1.0 | 0.8 | 3.4 | 3.2 |
| KRT81    | 30865 | 32334 | 32587 | 23590 | 24147 | 22943 | 98739 | 104040 | 98906 | 95835 | 93644 | 1.0 | 0.7 | 3.1 | 3.0 |
| USP30    | 663   | 579   | 633   | 497   | 561   | 498   | 821   | 861    | 815   | 784   | 738   | 1.0 | 0.8 | 1.3 | 1.2 |
| HSH2D    | 139   | 118   | 119   | 83    | 92    | 69    | 168   | 209    | 160   | 171   | 160   | 1.0 | 0.6 | 1.4 | 1.3 |
| S100A14  | 17916 | 17418 | 17107 | 14213 | 14553 | 14394 | 20941 | 22926  | 21742 | 21903 | 21687 | 1.0 | 0.8 | 1.3 | 1.2 |
| CASD1    | 896   | 886   | 825   | 685   | 753   | 718   | 991   | 1065   | 1021  | 1005  | 1010  | 1.0 | 0.8 | 1.2 | 1.2 |
| FAM114A1 | 990   | 923   | 1003  | 703   | 742   | 778   | 1326  | 1253   | 1380  | 1149  | 1203  | 1.0 | 0.8 | 1.4 | 1.2 |
| PLEKHA2  | 922   | 902   | 897   | 718   | 781   | 768   | 1313  | 1135   | 1250  | 1109  | 1145  | 1.0 | 0.8 | 1.4 | 1.2 |
| NCEH1    | 830   | 771   | 819   | 605   | 652   | 713   | 1097  | 1112   | 996   | 1042  | 992   | 1.0 | 0.8 | 1.3 | 1.3 |
| CAPN5    | 313   | 332   | 340   | 252   | 255   | 252   | 538   | 516    | 485   | 449   | 410   | 1.0 | 0.8 | 1.6 | 1.3 |
| KYNU     | 2705  | 2858  | 2767  | 2051  | 2106  | 2062  | 4175  | 4204   | 4041  | 3817  | 3780  | 1.0 | 0.7 | 1.5 | 1.4 |
| SPDEF    | 4923  | 4936  | 4764  | 3748  | 3717  | 3851  | 6807  | 7126   | 6865  | 6252  | 6148  | 1.0 | 0.8 | 1.4 | 1.3 |
| LYPD3    | 1836  | 1868  | 1773  | 1277  | 1224  | 1269  | 3077  | 3068   | 3077  | 2682  | 2558  | 1.0 | 0.7 | 1.7 | 1.4 |
| C2CD4A   | 131   | 199   | 168   | 110   | 100   | 103   | 318   | 320    | 284   | 273   | 302   | 1.0 | 0.6 | 1.9 | 1.7 |
| AHR      | 2410  | 2506  | 2525  | 1845  | 1908  | 2019  | 3397  | 3554   | 3206  | 3213  | 3297  | 1.0 | 0.8 | 1.4 | 1.3 |
| DUSP6    | 786   | 786   | 797   | 447   | 483   | 469   | 1442  | 1468   | 1328  | 1341  | 1355  | 1.0 | 0.6 | 1.8 | 1.7 |
| KLF5     | 1199  | 1199  | 1235  | 920   | 967   | 958   | 1665  | 1672   | 1621  | 1509  | 1611  | 1.0 | 0.8 | 1.4 | 1.3 |
| CAPG     | 980   | 1056  | 1013  | 733   | 840   | 808   | 1341  | 1420   | 1410  | 1270  | 1356  | 1.0 | 0.8 | 1.4 | 1.3 |
| GPR87    | 1600  | 1858  | 1695  | 1091  | 1188  | 1265  | 2342  | 2382   | 2273  | 2209  | 2185  | 1.0 | 0.7 | 1.4 | 1.3 |
| GDF15    | 976   | 1035  | 1084  | 732   | 781   | 832   | 1360  | 1514   | 1374  | 1311  | 1305  | 1.0 | 0.8 | 1.4 | 1.3 |
| ZFP36    | 911   | 873   | 897   | 798   | 712   | 688   | 1158  | 1154   | 1233  | 1220  | 1211  | 1.0 | 0.8 | 1.3 | 1.4 |
| ZNF750   | 144   | 167   | 149   | 94    | 70    | 69    | 293   | 220    | 263   | 259   | 243   | 1.0 | 0.5 | 1.7 | 1.6 |
| PTPN12   | 3833  | 3750  | 3726  | 3230  | 3087  | 3055  | 4330  | 4306   | 4437  | 4020  | 4217  | 1.0 | 0.8 | 1.2 | 1.1 |
| ARNT     | 2486  | 2469  | 2482  | 2165  | 2047  | 2098  | 2882  | 2931   | 2798  | 2739  | 2789  | 1.0 | 0.8 | 1.2 | 1.1 |
| TMPRSS13 | 485   | 472   | 432   | 398   | 394   | 357   | 690   | 673    | 589   | 601   | 540   | 1.0 | 0.8 | 1.4 | 1.2 |
| ELF3     | 569   | 539   | 495   | 459   | 448   | 418   | 843   | 859    | 741   | 600   | 649   | 1.0 | 0.8 | 1.5 | 1.2 |
| ABTB1    | 577   | 508   | 529   | 458   | 403   | 411   | 793   | 727    | 731   | 600   | 537   | 1.0 | 0.8 | 1.4 | 1.1 |
| CMYA5    | 324   | 308   | 348   | 275   | 257   | 235   | 533   | 494    | 548   | 420   | 384   | 1.0 | 0.8 | 1.6 | 1.2 |
| RAP1GAP  | 437   | 363   | 437   | 286   | 310   | 255   | 717   | 709    | 675   | 497   | 435   | 1.0 | 0.7 | 1.7 | 1.1 |
| BRAF     | 452   | 532   | 536   | 435   | 419   | 387   | 705   | 694    | 721   | 575   | 641   | 1.0 | 0.8 | 1.4 | 1.2 |
| TACSTD2  | 9155  | 10132 | 9920  | 8428  | 7960  | 8234  | 12211 | 12391  | 12603 | 10707 | 10461 | 1.0 | 0.8 | 1.3 | 1.1 |
| FLOT1    | 1044  | 1159  | 1095  | 879   | 923   | 897   | 1675  | 1733   | 1727  | 1456  | 1513  | 1.0 | 0.8 | 1.6 | 1.4 |
| NTN4     | 976   | 1002  | 905   | 678   | 722   | 708   | 1714  | 1917   | 1828  | 1364  | 1469  | 1.0 | 0.7 | 1.9 | 1.5 |
| TMEM150C | 1434  | 1574  | 1411  | 1249  | 1140  | 1199  | 2375  | 2374   | 2474  | 1842  | 2001  | 1.0 | 0.8 | 1.6 | 1.3 |
| IKZF2    | 186   | 176   | 199   | 171   | 126   | 129   | 565   | 614    | 649   | 412   | 375   | 1.0 | 0.8 | 3.3 | 2.1 |
| TMPRSS4  | 175   | 192   | 175   | 146   | 108   | 137   | 190   | 240    | 223   | 211   | 244   | 1.0 | 0.7 | 1.2 | 1.3 |
| ZFYVE19  | 601   | 543   | 612   | 526   | 497   | 460   | 590   | 666    | 671   | 635   | 642   | 1.0 | 0.8 | 1.1 | 1.1 |
| MARVELD3 | 1470  | 1407  | 1410  | 1231  | 1094  | 1161  | 1647  | 1630   | 1517  | 1493  | 1580  | 1.0 | 0.8 | 1.1 | 1.1 |
| MFAP3L   | 360   | 306   | 332   | 279   | 243   | 243   | 416   | 467    | 376   | 381   | 393   | 1.0 | 0.8 | 1.3 | 1.2 |
| ARHGAP27 | 383   | 353   | 451   | 290   | 271   | 275   | 532   | 464    | 485   | 456   | 478   | 1.0 | 0.7 | 1.2 | 1.2 |
| ACP6     | 793   | 919   | 877   | 696   | 599   | 604   | 1088  | 1058   | 1050  | 905   | 986   | 1.0 | 0.7 | 1.2 | 1.1 |
| DTX2     | 636   | 631   | 660   | 542   | 475   | 508   | 818   | 761    | 799   | 658   | 758   | 1.0 | 0.8 | 1.2 | 1.1 |

|            |      |      |      |      |      |      |      |      |      |      |      |     |     |     |     |
|------------|------|------|------|------|------|------|------|------|------|------|------|-----|-----|-----|-----|
| SEMA6C     | 247  | 206  | 303  | 163  | 129  | 171  | 431  | 438  | 440  | 328  | 339  | 1.0 | 0.6 | 1.7 | 1.3 |
| CHST11     | 1059 | 1021 | 1139 | 909  | 881  | 925  | 1305 | 1382 | 1441 | 1208 | 1248 | 1.0 | 0.8 | 1.3 | 1.1 |
| BRI3       | 1304 | 1278 | 1412 | 1137 | 1066 | 1198 | 1473 | 1624 | 1482 | 1311 | 1437 | 1.0 | 0.9 | 1.1 | 1.0 |
| KREMEN1    | 643  | 614  | 655  | 491  | 469  | 539  | 911  | 1087 | 914  | 771  | 844  | 1.0 | 0.8 | 1.5 | 1.3 |
| PRKCH      | 1375 | 1289 | 1317 | 1046 | 1045 | 1171 | 1582 | 1701 | 1602 | 1375 | 1602 | 1.0 | 0.8 | 1.2 | 1.1 |
| NAB2       | 3782 | 3828 | 3742 | 3201 | 3137 | 3159 | 3503 | 3846 | 3675 | 4402 | 4164 | 1.0 | 0.8 | 1.0 | 1.1 |
| ITGA6      | 985  | 1031 | 1040 | 795  | 860  | 815  | 1031 | 1144 | 1076 | 1243 | 1348 | 1.0 | 0.8 | 1.1 | 1.3 |
| SLC44A3    | 155  | 159  | 161  | 118  | 102  | 121  | 201  | 242  | 146  | 188  | 214  | 1.0 | 0.7 | 1.2 | 1.3 |
| S100A2     | 1137 | 1087 | 1050 | 766  | 867  | 765  | 1218 | 1586 | 1113 | 1276 | 1323 | 1.0 | 0.7 | 1.2 | 1.2 |
| SGCB       | 695  | 650  | 718  | 472  | 569  | 549  | 801  | 854  | 818  | 846  | 789  | 1.0 | 0.8 | 1.2 | 1.2 |
| SLC25A18   | 155  | 144  | 167  | 84   | 94   | 120  | 183  | 245  | 190  | 197  | 191  | 1.0 | 0.6 | 1.3 | 1.3 |
| SOX9       | 811  | 670  | 832  | 540  | 616  | 655  | 803  | 894  | 893  | 880  | 938  | 1.0 | 0.8 | 1.1 | 1.2 |
| ZNF365     | 832  | 782  | 800  | 507  | 573  | 678  | 958  | 938  | 847  | 894  | 916  | 1.0 | 0.7 | 1.1 | 1.1 |
| CSGALNACT2 | 859  | 859  | 871  | 697  | 696  | 756  | 934  | 857  | 902  | 917  | 948  | 1.0 | 0.8 | 1.0 | 1.1 |
| IFT88      | 552  | 470  | 472  | 400  | 422  | 426  | 533  | 474  | 436  | 428  | 579  | 1.0 | 0.8 | 1.0 | 1.0 |
| SP4        | 394  | 421  | 350  | 324  | 313  | 309  | 437  | 413  | 413  | 344  | 398  | 1.0 | 0.8 | 1.1 | 1.0 |
| ZG16B      | 340  | 360  | 305  | 278  | 261  | 276  | 402  | 415  | 316  | 313  | 359  | 1.0 | 0.8 | 1.1 | 1.0 |
| C5orf49    | 59   | 65   | 46   | 38   | 22   | 32   | 54   | 51   | 55   | 26   | 66   | 1.0 | 0.5 | 0.9 | 0.8 |
| PLK3       | 180  | 224  | 198  | 157  | 118  | 134  | 191  | 210  | 180  | 184  | 219  | 1.0 | 0.7 | 1.0 | 1.0 |
| CHMP1B     | 2807 | 2954 | 2858 | 2524 | 2230 | 2538 | 2948 | 3051 | 2808 | 2704 | 2852 | 1.0 | 0.8 | 1.0 | 1.0 |
| PBRM1      | 1771 | 1806 | 1943 | 1546 | 1552 | 1503 | 1863 | 1918 | 2028 | 1750 | 1760 | 1.0 | 0.8 | 1.1 | 1.0 |
| DMTN       | 484  | 468  | 524  | 368  | 373  | 365  | 507  | 559  | 610  | 496  | 484  | 1.0 | 0.7 | 1.1 | 1.0 |
| SECISBP2L  | 953  | 920  | 933  | 807  | 837  | 716  | 969  | 1031 | 1024 | 887  | 941  | 1.0 | 0.8 | 1.1 | 1.0 |
| CCDC83     | 202  | 151  | 215  | 152  | 125  | 115  | 180  | 224  | 229  | 155  | 167  | 1.0 | 0.7 | 1.1 | 0.9 |
| RND3       | 2802 | 2869 | 2756 | 2327 | 2368 | 2353 | 3051 | 3030 | 2929 | 2392 | 2607 | 1.0 | 0.8 | 1.1 | 0.9 |
| DDIT4      | 3206 | 3232 | 3065 | 2642 | 2650 | 2635 | 3647 | 3722 | 3684 | 2672 | 2630 | 1.0 | 0.8 | 1.2 | 0.8 |
| FAM171B    | 591  | 513  | 506  | 422  | 382  | 454  | 593  | 662  | 636  | 398  | 488  | 1.0 | 0.8 | 1.2 | 0.8 |
| ABHD4      | 816  | 746  | 788  | 606  | 563  | 677  | 965  | 1064 | 975  | 679  | 745  | 1.0 | 0.8 | 1.3 | 0.9 |
| TM4SF18    | 77   | 80   | 98   | 40   | 40   | 55   | 105  | 155  | 118  | 60   | 55   | 1.0 | 0.5 | 1.5 | 0.7 |
| MARK2      | 4067 | 4104 | 4104 | 3561 | 3364 | 3553 | 3981 | 4264 | 4132 | 3914 | 3860 | 1.0 | 0.9 | 1.0 | 0.9 |
| NAGK       | 3152 | 3170 | 2986 | 2683 | 2472 | 2594 | 3176 | 3374 | 3235 | 2979 | 2834 | 1.0 | 0.8 | 1.1 | 0.9 |
| RAB11B-AS1 | 257  | 263  | 263  | 222  | 192  | 194  | 249  | 287  | 284  | 239  | 224  | 1.0 | 0.8 | 1.0 | 0.9 |
| EPB41L5    | 2416 | 2282 | 2259 | 1883 | 1831 | 1778 | 2402 | 2411 | 2337 | 2065 | 2097 | 1.0 | 0.8 | 1.0 | 0.9 |
| HEXIM1     | 2724 | 2709 | 2621 | 2112 | 2124 | 2042 | 2680 | 2893 | 2699 | 2424 | 2388 | 1.0 | 0.8 | 1.0 | 0.9 |
| S100A9     | 509  | 480  | 503  | 388  | 354  | 353  | 498  | 515  | 497  | 447  | 475  | 1.0 | 0.7 | 1.0 | 0.9 |
| KHNYN      | 3520 | 3548 | 3653 | 2950 | 2890 | 2880 | 3722 | 3636 | 3761 | 3372 | 3411 | 1.0 | 0.8 | 1.0 | 0.9 |
| TTC9       | 760  | 795  | 795  | 577  | 632  | 529  | 848  | 895  | 850  | 757  | 696  | 1.0 | 0.7 | 1.1 | 0.9 |
| PITPNM1    | 1382 | 1527 | 1492 | 1135 | 1135 | 1102 | 1453 | 1677 | 1495 | 1455 | 1269 | 1.0 | 0.8 | 1.1 | 0.9 |
| RBBP8NL    | 371  | 378  | 301  | 278  | 273  | 256  | 442  | 445  | 406  | 322  | 299  | 1.0 | 0.8 | 1.2 | 0.9 |
| ETV4       | 172  | 178  | 148  | 132  | 113  | 108  | 184  | 206  | 204  | 182  | 131  | 1.0 | 0.7 | 1.2 | 0.9 |
| EFEMP1     | 7573 | 7434 | 7416 | 5910 | 5746 | 5531 | 8593 | 8245 | 8405 | 6549 | 6511 | 1.0 | 0.8 | 1.1 | 0.9 |
| PGPEP1     | 700  | 728  | 665  | 525  | 518  | 503  | 788  | 808  | 837  | 679  | 608  | 1.0 | 0.7 | 1.2 | 0.9 |
| TM4SF1     | 1102 | 1162 | 1106 | 380  | 428  | 460  | 1339 | 1365 | 1391 | 781  | 675  | 1.0 | 0.4 | 1.2 | 0.6 |
| CLDN9      | 655  | 620  | 653  | 500  | 436  | 495  | 701  | 697  | 675  | 556  | 495  | 1.0 | 0.7 | 1.1 | 0.8 |
| MSRB1      | 1133 | 1156 | 1053 | 943  | 834  | 892  | 1116 | 1122 | 1107 | 991  | 928  | 1.0 | 0.8 | 1.0 | 0.9 |
| EZR-AS1    | 475  | 512  | 516  | 320  | 332  | 384  | 483  | 513  | 619  | 530  | 406  | 1.0 | 0.7 | 1.1 | 0.9 |
| CASZ1      | 1487 | 1582 | 1633 | 1140 | 1042 | 1185 | 1552 | 1641 | 1760 | 1400 | 1430 | 1.0 | 0.7 | 1.1 | 0.9 |
| UBALD2     | 1148 | 1159 | 1213 | 759  | 707  | 860  | 1157 | 1152 | 1279 | 1027 | 1040 | 1.0 | 0.7 | 1.0 | 0.9 |
| CEBPB      | 3210 | 3348 | 3563 | 2768 | 2478 | 2899 | 3482 | 3664 | 3626 | 3251 | 3003 | 1.0 | 0.8 | 1.1 | 0.9 |
| TTYH3      | 4766 | 4916 | 5118 | 4186 | 4013 | 4228 | 5026 | 5030 | 5143 | 4650 | 4322 | 1.0 | 0.8 | 1.0 | 0.9 |
| SNN        | 1636 | 1531 | 1373 | 1230 | 1171 | 1209 | 1492 | 1555 | 1638 | 1281 | 1319 | 1.0 | 0.8 | 1.0 | 0.9 |
| DDX59      | 615  | 556  | 546  | 477  | 413  | 453  | 556  | 595  | 698  | 493  | 547  | 1.0 | 0.8 | 1.1 | 0.9 |
| TMEM54     | 1551 | 1591 | 1595 | 1417 | 1289 | 1335 | 1552 | 1540 | 1557 | 1387 | 1495 | 1.0 | 0.9 | 1.0 | 0.9 |
| GATA2      | 1534 | 1623 | 1546 | 1415 | 1186 | 1336 | 1626 | 1576 | 1610 | 1308 | 1373 | 1.0 | 0.8 | 1.0 | 0.9 |
| HDAC5      | 454  | 623  | 531  | 406  | 411  | 445  | 634  | 588  | 543  | 455  | 442  | 1.0 | 0.8 | 1.1 | 0.8 |
| EPOR       | 100  | 115  | 145  | 78   | 83   | 79   | 153  | 137  | 124  | 80   | 69   | 1.0 | 0.7 | 1.1 | 0.6 |
| CLEC3A     | 573  | 639  | 527  | 450  | 385  | 371  | 540  | 507  | 521  | 234  | 257  | 1.0 | 0.7 | 0.9 | 0.4 |
| BMF        | 1274 | 1383 | 1378 | 1097 | 974  | 1047 | 1603 | 1447 | 1392 | 765  | 757  | 1.0 | 0.8 | 1.1 | 0.6 |
| HPCA       | 474  | 497  | 503  | 409  | 393  | 432  | 468  | 499  | 478  | 392  | 388  | 1.0 | 0.8 | 1.0 | 0.8 |
| FAM20C     | 2772 | 2873 | 2967 | 2467 | 2257 | 2398 | 2743 | 2784 | 2865 | 2168 | 2039 | 1.0 | 0.8 | 1.0 | 0.7 |
| SEMA3E     | 2210 | 2304 | 2232 | 1880 | 1887 | 1936 | 2176 | 2289 | 2270 | 1630 | 1733 | 1.0 | 0.8 | 1.0 | 0.7 |
| MAP2       | 908  | 907  | 891  | 753  | 719  | 721  | 870  | 881  | 954  | 721  | 667  | 1.0 | 0.8 | 1.0 | 0.8 |
| SP2        | 1141 | 1126 | 1184 | 979  | 903  | 934  | 1157 | 1216 | 1261 | 920  | 941  | 1.0 | 0.8 | 1.1 | 0.8 |
| VAT1L      | 95   | 75   | 72   | 54   | 42   | 60   | 77   | 116  | 95   | 54   | 35   | 1.0 | 0.6 | 1.2 | 0.5 |
| STX5       | 1465 | 1368 | 1408 | 1215 | 1138 | 1234 | 1349 | 1465 | 1299 | 1255 | 1186 | 1.0 | 0.8 | 1.0 | 0.9 |
| SLC26A10   | 333  | 291  | 317  | 238  | 242  | 263  | 260  | 310  | 261  | 267  | 254  | 1.0 | 0.8 | 0.9 | 0.8 |

|             |       |       |       |       |       |       |       |       |       |       |       |     |     |     |     |
|-------------|-------|-------|-------|-------|-------|-------|-------|-------|-------|-------|-------|-----|-----|-----|-----|
| DDA1        | 1461  | 1320  | 1532  | 1247  | 1173  | 1258  | 1341  | 1482  | 1435  | 1361  | 1221  | 1.0 | 0.9 | 1.0 | 0.9 |
| PPP1R18     | 144   | 131   | 163   | 94    | 108   | 112   | 116   | 130   | 97    | 127   | 89    | 1.0 | 0.7 | 0.8 | 0.7 |
| DENND1C     | 599   | 535   | 562   | 398   | 406   | 396   | 429   | 545   | 482   | 519   | 392   | 1.0 | 0.7 | 0.9 | 0.8 |
| BIN1        | 299   | 266   | 256   | 220   | 207   | 199   | 199   | 248   | 227   | 223   | 180   | 1.0 | 0.8 | 0.8 | 0.7 |
| NME7        | 910   | 881   | 832   | 720   | 757   | 721   | 712   | 834   | 755   | 770   | 732   | 1.0 | 0.8 | 0.9 | 0.9 |
| RTN2        | 593   | 615   | 588   | 503   | 431   | 417   | 575   | 562   | 604   | 562   | 465   | 1.0 | 0.8 | 1.0 | 0.9 |
| PVRL2       | 6486  | 6647  | 6358  | 5498  | 5254  | 5301  | 5619  | 6088  | 6190  | 5743  | 5443  | 1.0 | 0.8 | 0.9 | 0.9 |
| PI4K2B      | 1563  | 1640  | 1491  | 1306  | 1273  | 1260  | 1448  | 1450  | 1540  | 1352  | 1356  | 1.0 | 0.8 | 0.9 | 0.9 |
| VPS37D      | 181   | 216   | 202   | 131   | 154   | 137   | 155   | 195   | 240   | 169   | 146   | 1.0 | 0.7 | 1.0 | 0.8 |
| SNHG18      | 55    | 60    | 38    | 28    | 29    | 29    | 40    | 62    | 57    | 46    | 35    | 1.0 | 0.6 | 1.0 | 0.8 |
| MESDC1      | 2277  | 2731  | 2729  | 2178  | 2106  | 2136  | 2430  | 2680  | 2721  | 2715  | 2417  | 1.0 | 0.8 | 1.0 | 1.0 |
| CHIC2       | 176   | 221   | 221   | 165   | 142   | 149   | 162   | 165   | 199   | 191   | 174   | 1.0 | 0.7 | 0.8 | 0.9 |
| RAB43       | 207   | 222   | 207   | 140   | 132   | 184   | 178   | 171   | 213   | 214   | 169   | 1.0 | 0.7 | 0.9 | 0.9 |
| MOB4        | 631   | 676   | 623   | 457   | 495   | 540   | 603   | 612   | 638   | 610   | 614   | 1.0 | 0.8 | 1.0 | 1.0 |
| KCTD5       | 2361  | 2558  | 2416  | 1883  | 2041  | 2147  | 2319  | 2290  | 2225  | 2318  | 2295  | 1.0 | 0.8 | 0.9 | 0.9 |
| PKNOX1      | 1007  | 936   | 952   | 831   | 805   | 821   | 918   | 892   | 932   | 902   | 912   | 1.0 | 0.8 | 0.9 | 0.9 |
| MEAF6       | 1770  | 1710  | 1654  | 1517  | 1407  | 1436  | 1646  | 1597  | 1667  | 1669  | 1666  | 1.0 | 0.8 | 1.0 | 1.0 |
| VSIG10L     | 206   | 205   | 242   | 150   | 113   | 127   | 171   | 203   | 193   | 184   | 207   | 1.0 | 0.6 | 0.9 | 0.9 |
| BHLHE40-AS1 | 123   | 103   | 110   | 94    | 56    | 63    | 95    | 96    | 81    | 70    | 81    | 1.0 | 0.6 | 0.8 | 0.7 |
| ARNTL       | 332   | 302   | 337   | 296   | 242   | 237   | 295   | 294   | 274   | 296   | 284   | 1.0 | 0.8 | 0.9 | 0.9 |
| DYRK1B      | 974   | 1047  | 1149  | 928   | 896   | 860   | 1027  | 1117  | 1119  | 955   | 952   | 1.0 | 0.8 | 1.0 | 0.9 |
| CYP4B1      | 135   | 141   | 164   | 116   | 94    | 105   | 152   | 197   | 153   | 118   | 114   | 1.0 | 0.7 | 1.1 | 0.8 |
| ITPKA       | 46    | 57    | 93    | 47    | 28    | 33    | 50    | 73    | 66    | 40    | 60    | 1.0 | 0.6 | 1.0 | 0.8 |
| ZNF254      | 492   | 484   | 578   | 427   | 387   | 369   | 539   | 481   | 501   | 440   | 487   | 1.0 | 0.8 | 1.0 | 0.9 |
| TRIOBP      | 186   | 226   | 242   | 168   | 163   | 149   | 216   | 209   | 179   | 165   | 180   | 1.0 | 0.7 | 0.9 | 0.8 |
| EMP3        | 117   | 146   | 163   | 90    | 93    | 96    | 143   | 151   | 132   | 111   | 134   | 1.0 | 0.7 | 1.0 | 0.9 |
| PPARD       | 795   | 852   | 928   | 655   | 624   | 645   | 827   | 796   | 851   | 769   | 719   | 1.0 | 0.7 | 1.0 | 0.9 |
| DNAJB1      | 8251  | 8501  | 8500  | 7197  | 7156  | 7200  | 8059  | 8295  | 8599  | 7787  | 7889  | 1.0 | 0.9 | 1.0 | 0.9 |
| GIPC1       | 9205  | 9596  | 9471  | 7977  | 7777  | 7911  | 8994  | 9126  | 9092  | 8868  | 8746  | 1.0 | 0.8 | 1.0 | 0.9 |
| RAB20       | 420   | 528   | 459   | 342   | 343   | 374   | 409   | 439   | 424   | 344   | 384   | 1.0 | 0.8 | 0.9 | 0.8 |
| SIPA1       | 161   | 184   | 145   | 118   | 102   | 127   | 142   | 178   | 134   | 110   | 119   | 1.0 | 0.7 | 0.9 | 0.7 |
| ARFGAP3     | 691   | 805   | 679   | 624   | 623   | 594   | 652   | 680   | 631   | 585   | 613   | 1.0 | 0.8 | 0.9 | 0.8 |
| MARCH5      | 2508  | 2676  | 2363  | 2096  | 2118  | 2131  | 2418  | 2374  | 2210  | 2173  | 2375  | 1.0 | 0.8 | 0.9 | 0.9 |
| MB          | 369   | 350   | 325   | 238   | 260   | 230   | 329   | 378   | 273   | 245   | 300   | 1.0 | 0.7 | 0.9 | 0.8 |
| SLC4A2      | 10750 | 10588 | 11073 | 8726  | 8225  | 8306  | 9782  | 10122 | 9758  | 8541  | 8449  | 1.0 | 0.8 | 0.9 | 0.8 |
| LGALS8      | 3069  | 3069  | 3219  | 2628  | 2599  | 2561  | 2983  | 3012  | 2923  | 2614  | 2723  | 1.0 | 0.8 | 1.0 | 0.9 |
| KIAA1522    | 8941  | 9032  | 9279  | 7385  | 7210  | 6966  | 8668  | 8582  | 8672  | 7175  | 7431  | 1.0 | 0.8 | 1.0 | 0.8 |
| PDPK1       | 4452  | 4342  | 4451  | 3810  | 3779  | 3603  | 4142  | 4153  | 4146  | 3657  | 3671  | 1.0 | 0.8 | 0.9 | 0.8 |
| BCL2L1      | 4733  | 4654  | 4710  | 3953  | 3918  | 3892  | 4478  | 4487  | 4501  | 3792  | 3873  | 1.0 | 0.8 | 1.0 | 0.8 |
| ADAM10      | 4839  | 4759  | 4595  | 3635  | 3634  | 3533  | 4237  | 4322  | 4170  | 3561  | 3638  | 1.0 | 0.8 | 0.9 | 0.8 |
| CLMN        | 458   | 408   | 443   | 323   | 287   | 275   | 340   | 358   | 403   | 291   | 318   | 1.0 | 0.7 | 0.8 | 0.7 |
| AKAP9       | 3628  | 3705  | 3803  | 3061  | 3013  | 3012  | 3592  | 3569  | 3790  | 3159  | 3242  | 1.0 | 0.8 | 1.0 | 0.9 |
| MSX2        | 3067  | 3065  | 3048  | 2261  | 2079  | 2037  | 2983  | 2887  | 2857  | 2383  | 2384  | 1.0 | 0.7 | 1.0 | 0.8 |
| METRNL      | 5180  | 5220  | 5193  | 4270  | 4183  | 4161  | 4943  | 4931  | 4903  | 4489  | 4334  | 1.0 | 0.8 | 0.9 | 0.8 |
| LFNG        | 3299  | 3490  | 3612  | 3068  | 2775  | 2875  | 3350  | 3327  | 3332  | 2921  | 2953  | 1.0 | 0.8 | 1.0 | 0.8 |
| EDN1        | 651   | 787   | 760   | 469   | 506   | 538   | 647   | 599   | 641   | 480   | 494   | 1.0 | 0.7 | 0.9 | 0.7 |
| FAM110C     | 1140  | 1218  | 1217  | 779   | 799   | 767   | 945   | 968   | 975   | 671   | 719   | 1.0 | 0.7 | 0.8 | 0.6 |
| ITGB6       | 26370 | 26181 | 26405 | 17479 | 18643 | 18398 | 22619 | 22068 | 22241 | 16636 | 17048 | 1.0 | 0.7 | 0.8 | 0.6 |
| SMTN        | 6947  | 7227  | 7128  | 5034  | 5029  | 5059  | 5950  | 5639  | 6046  | 4726  | 4780  | 1.0 | 0.7 | 0.8 | 0.7 |
| SEPT10      | 515   | 577   | 565   | 389   | 394   | 372   | 472   | 443   | 454   | 367   | 365   | 1.0 | 0.7 | 0.8 | 0.7 |
| SLC9A3R2    | 2909  | 3053  | 3027  | 2372  | 2341  | 2495  | 2669  | 2852  | 2613  | 2334  | 2382  | 1.0 | 0.8 | 0.9 | 0.8 |
| ATP2C2      | 977   | 1070  | 974   | 738   | 714   | 716   | 845   | 867   | 811   | 713   | 761   | 1.0 | 0.7 | 0.8 | 0.7 |
| TSC22D2     | 4781  | 4868  | 4887  | 3965  | 4023  | 4048  | 4267  | 4358  | 4336  | 3932  | 3940  | 1.0 | 0.8 | 0.9 | 0.8 |
| OXTR        | 2709  | 2828  | 2854  | 1398  | 1462  | 1405  | 2030  | 2061  | 1947  | 1540  | 1481  | 1.0 | 0.5 | 0.7 | 0.5 |
| CRIP2       | 11815 | 12472 | 11924 | 9566  | 9266  | 9600  | 10412 | 10961 | 10941 | 9538  | 9238  | 1.0 | 0.8 | 0.9 | 0.8 |
| SOX13       | 2421  | 2387  | 2466  | 1981  | 1860  | 2036  | 2236  | 2202  | 2339  | 1949  | 2014  | 1.0 | 0.8 | 0.9 | 0.8 |
| CCDC68      | 365   | 336   | 367   | 191   | 184   | 233   | 278   | 261   | 277   | 216   | 232   | 1.0 | 0.6 | 0.8 | 0.6 |
| EDARADD     | 280   | 255   | 284   | 175   | 148   | 177   | 200   | 215   | 198   | 154   | 169   | 1.0 | 0.6 | 0.7 | 0.6 |
| MLLT11      | 729   | 663   | 732   | 543   | 470   | 532   | 606   | 631   | 620   | 558   | 560   | 1.0 | 0.7 | 0.9 | 0.8 |
| ZFYVE1      | 1233  | 1250  | 1268  | 926   | 872   | 915   | 1084  | 1154  | 1065  | 947   | 1019  | 1.0 | 0.7 | 0.9 | 0.8 |
| JUNB        | 8151  | 9114  | 9185  | 5512  | 5530  | 6068  | 7271  | 7523  | 7568  | 7169  | 6473  | 1.0 | 0.6 | 0.8 | 0.8 |
| BAIAP2L1    | 2713  | 2804  | 2868  | 1926  | 2133  | 2225  | 2605  | 2508  | 2499  | 2341  | 2316  | 1.0 | 0.7 | 0.9 | 0.8 |
| BCL3        | 1031  | 1093  | 1165  | 772   | 789   | 889   | 994   | 921   | 964   | 908   | 818   | 1.0 | 0.7 | 0.9 | 0.8 |
| GYLTL1B     | 195   | 189   | 189   | 143   | 135   | 162   | 170   | 167   | 177   | 168   | 153   | 1.0 | 0.8 | 0.9 | 0.8 |
| RIT1        | 1212  | 1250  | 1201  | 978   | 930   | 1029  | 1179  | 1090  | 1151  | 1052  | 990   | 1.0 | 0.8 | 0.9 | 0.8 |
| C1orf106    | 1606  | 1504  | 1530  | 1112  | 1070  | 1143  | 1400  | 1245  | 1360  | 1256  | 1229  | 1.0 | 0.7 | 0.9 | 0.8 |

|            |       |       |       |       |       |       |       |       |       |       |       |     |     |     |     |
|------------|-------|-------|-------|-------|-------|-------|-------|-------|-------|-------|-------|-----|-----|-----|-----|
| FERMT2     | 2790  | 2741  | 2773  | 2059  | 2064  | 2163  | 2612  | 2416  | 2466  | 2299  | 2275  | 1.0 | 0.8 | 0.9 | 0.8 |
| IRF2BPL    | 2976  | 3453  | 3422  | 2583  | 2655  | 2782  | 3263  | 3201  | 3193  | 2788  | 2584  | 1.0 | 0.8 | 1.0 | 0.8 |
| GAS2L1     | 2415  | 2625  | 2562  | 2108  | 2086  | 2056  | 2368  | 2434  | 2499  | 2257  | 2099  | 1.0 | 0.8 | 1.0 | 0.9 |
| PTPRJ      | 1956  | 1988  | 2008  | 1582  | 1681  | 1639  | 2078  | 1961  | 2053  | 1626  | 1605  | 1.0 | 0.8 | 1.0 | 0.8 |
| MYO6       | 5072  | 5221  | 4965  | 4235  | 4324  | 4285  | 5251  | 4865  | 5221  | 4369  | 4620  | 1.0 | 0.8 | 1.0 | 0.9 |
| ARHGAP29   | 538   | 560   | 615   | 399   | 460   | 416   | 520   | 517   | 571   | 416   | 459   | 1.0 | 0.7 | 0.9 | 0.8 |
| KIAA1462   | 1246  | 1198  | 1256  | 846   | 940   | 898   | 1102  | 1075  | 1211  | 940   | 892   | 1.0 | 0.7 | 0.9 | 0.7 |
| PDGFB      | 2388  | 2403  | 2531  | 1965  | 1974  | 2077  | 2385  | 2408  | 2294  | 2133  | 2131  | 1.0 | 0.8 | 1.0 | 0.9 |
| LIPH       | 566   | 565   | 579   | 328   | 339   | 364   | 534   | 541   | 516   | 379   | 396   | 1.0 | 0.6 | 0.9 | 0.7 |
| SSH3       | 3534  | 3324  | 3488  | 2851  | 2711  | 2780  | 3541  | 3362  | 3339  | 2944  | 2943  | 1.0 | 0.8 | 1.0 | 0.9 |
| IQGAP1     | 18985 | 18009 | 19148 | 15016 | 15409 | 14964 | 18891 | 18519 | 18477 | 16553 | 17018 | 1.0 | 0.8 | 1.0 | 0.9 |
| SPNS2      | 515   | 533   | 494   | 323   | 323   | 320   | 505   | 502   | 432   | 386   | 424   | 1.0 | 0.6 | 0.9 | 0.8 |
| DDAH2      | 1692  | 1783  | 1587  | 1330  | 1312  | 1294  | 1655  | 1638  | 1624  | 1473  | 1455  | 1.0 | 0.8 | 1.0 | 0.9 |
| GAB1       | 841   | 892   | 788   | 642   | 626   | 611   | 782   | 815   | 762   | 723   | 683   | 1.0 | 0.7 | 0.9 | 0.8 |
| CSGALNACT1 | 1436  | 1426  | 1374  | 923   | 1016  | 1001  | 1251  | 1421  | 1265  | 975   | 1029  | 1.0 | 0.7 | 0.9 | 0.7 |
| PLD2       | 608   | 550   | 524   | 413   | 408   | 413   | 536   | 520   | 512   | 428   | 399   | 1.0 | 0.7 | 0.9 | 0.7 |
| S100A10    | 40473 | 40372 | 38343 | 33343 | 33239 | 33321 | 38406 | 37189 | 36359 | 34375 | 34704 | 1.0 | 0.8 | 0.9 | 0.9 |
| BAD        | 861   | 993   | 856   | 789   | 695   | 794   | 729   | 921   | 828   | 831   | 858   | 1.0 | 0.8 | 0.9 | 0.9 |
| PTS        | 378   | 354   | 337   | 252   | 297   | 300   | 269   | 347   | 307   | 274   | 339   | 1.0 | 0.8 | 0.9 | 0.9 |
| OSTM1      | 1133  | 1158  | 1154  | 800   | 973   | 879   | 957   | 1154  | 927   | 984   | 993   | 1.0 | 0.8 | 0.9 | 0.9 |
| SPRY4      | 370   | 412   | 356   | 239   | 278   | 278   | 309   | 369   | 297   | 363   | 327   | 1.0 | 0.7 | 0.9 | 0.9 |
| PHLDA1     | 4194  | 4633  | 4674  | 2720  | 3083  | 3134  | 3517  | 3549  | 3543  | 4018  | 4176  | 1.0 | 0.7 | 0.8 | 0.9 |
| CORO1A     | 503   | 474   | 554   | 367   | 371   | 387   | 446   | 481   | 384   | 483   | 469   | 1.0 | 0.7 | 0.9 | 0.9 |
| LGALS8-AS1 | 168   | 172   | 158   | 121   | 106   | 111   | 122   | 129   | 116   | 135   | 141   | 1.0 | 0.7 | 0.7 | 0.8 |
| TAF13      | 2299  | 2236  | 2246  | 1847  | 1876  | 1952  | 2056  | 2133  | 2005  | 1975  | 2004  | 1.0 | 0.8 | 0.9 | 0.9 |
| VASP       | 5179  | 5178  | 5223  | 3985  | 3951  | 4183  | 4583  | 4734  | 4617  | 4469  | 4370  | 1.0 | 0.8 | 0.9 | 0.9 |
| CAPN2      | 7532  | 7497  | 7382  | 5698  | 5677  | 5820  | 6335  | 6694  | 6451  | 6223  | 6299  | 1.0 | 0.8 | 0.9 | 0.8 |
| OVOL1      | 1483  | 1471  | 1475  | 1183  | 1165  | 1174  | 1332  | 1275  | 1204  | 1206  | 1259  | 1.0 | 0.8 | 0.9 | 0.8 |
| FAM214A    | 2109  | 2139  | 2068  | 1751  | 1696  | 1694  | 2008  | 1955  | 1775  | 1794  | 1830  | 1.0 | 0.8 | 0.9 | 0.9 |
| ARNTL2     | 1165  | 1408  | 1360  | 989   | 1066  | 911   | 1065  | 1106  | 1150  | 1094  | 1142  | 1.0 | 0.8 | 0.8 | 0.9 |
| MAP1S      | 906   | 957   | 1048  | 747   | 715   | 734   | 837   | 884   | 848   | 803   | 818   | 1.0 | 0.8 | 0.9 | 0.8 |
| TMC7       | 400   | 468   | 476   | 341   | 340   | 346   | 387   | 383   | 357   | 387   | 380   | 1.0 | 0.8 | 0.8 | 0.9 |
| OTUD1      | 1080  | 1154  | 1251  | 871   | 841   | 963   | 970   | 1009  | 929   | 909   | 916   | 1.0 | 0.8 | 0.8 | 0.8 |
| PTPRE      | 1138  | 1134  | 1175  | 755   | 828   | 927   | 878   | 916   | 886   | 932   | 873   | 1.0 | 0.7 | 0.8 | 0.8 |
| STX1A      | 1072  | 996   | 1083  | 791   | 860   | 899   | 948   | 950   | 857   | 868   | 921   | 1.0 | 0.8 | 0.9 | 0.9 |
| GCLM       | 743   | 842   | 838   | 608   | 696   | 726   | 697   | 701   | 671   | 647   | 725   | 1.0 | 0.8 | 0.9 | 0.8 |
| PANK2      | 707   | 771   | 789   | 607   | 721   | 593   | 688   | 861   | 655   | 783   | 691   | 1.0 | 0.8 | 1.0 | 1.0 |
| SAMD8      | 555   | 536   | 553   | 462   | 494   | 412   | 515   | 620   | 519   | 444   | 560   | 1.0 | 0.8 | 1.0 | 0.9 |
| CAB39L     | 281   | 249   | 261   | 197   | 233   | 185   | 266   | 319   | 252   | 232   | 272   | 1.0 | 0.8 | 1.1 | 1.0 |
| CCDC114    | 90    | 97    | 84    | 57    | 68    | 51    | 100   | 93    | 84    | 82    | 73    | 1.0 | 0.6 | 1.0 | 0.9 |
| SPAG7      | 972   | 926   | 986   | 823   | 838   | 744   | 989   | 926   | 949   | 909   | 840   | 1.0 | 0.8 | 1.0 | 0.9 |
| DUSP5      | 1002  | 974   | 1017  | 526   | 577   | 516   | 848   | 891   | 786   | 867   | 789   | 1.0 | 0.5 | 0.8 | 0.8 |
| MEF2D      | 1279  | 1266  | 1263  | 1069  | 1091  | 1011  | 1253  | 1168  | 1178  | 1137  | 1209  | 1.0 | 0.8 | 0.9 | 0.9 |
| CDK17      | 1638  | 1751  | 1757  | 1387  | 1500  | 1376  | 1703  | 1517  | 1556  | 1647  | 1584  | 1.0 | 0.8 | 0.9 | 0.9 |
| MKKN1      | 574   | 516   | 503   | 395   | 474   | 443   | 504   | 499   | 507   | 484   | 457   | 1.0 | 0.8 | 0.9 | 0.9 |
| LCOR       | 945   | 934   | 987   | 621   | 842   | 741   | 903   | 958   | 921   | 934   | 905   | 1.0 | 0.8 | 1.0 | 1.0 |
| TMTC2      | 864   | 858   | 879   | 692   | 812   | 687   | 887   | 875   | 955   | 846   | 928   | 1.0 | 0.8 | 1.0 | 1.0 |
| STAM2      | 1218  | 1194  | 1218  | 977   | 1074  | 1025  | 1245  | 1266  | 1279  | 1200  | 1200  | 1.0 | 0.8 | 1.0 | 1.0 |
| ATP11B     | 2518  | 2531  | 2443  | 2057  | 2222  | 2016  | 2604  | 2588  | 2617  | 2508  | 2520  | 1.0 | 0.8 | 1.0 | 1.0 |
| TMEM87B    | 1933  | 1985  | 2030  | 1604  | 1678  | 1676  | 2085  | 2194  | 2064  | 1872  | 2060  | 1.0 | 0.8 | 1.1 | 1.0 |
| KTN1       | 9807  | 9617  | 9694  | 8197  | 8361  | 8162  | 9737  | 10083 | 9453  | 9237  | 9832  | 1.0 | 0.8 | 1.0 | 1.0 |
| WDR47      | 1491  | 1412  | 1538  | 1136  | 1167  | 1096  | 1515  | 1534  | 1500  | 1359  | 1513  | 1.0 | 0.8 | 1.0 | 1.0 |
| TP53BP2    | 1427  | 1356  | 1420  | 1122  | 1171  | 1206  | 1403  | 1417  | 1458  | 1289  | 1325  | 1.0 | 0.8 | 1.0 | 0.9 |
| KIAA0232   | 2931  | 2931  | 2913  | 2360  | 2557  | 2525  | 2905  | 2887  | 2990  | 2802  | 2754  | 1.0 | 0.8 | 1.0 | 0.9 |
| TEAD3      | 1552  | 1469  | 1504  | 1116  | 1185  | 1218  | 1574  | 1567  | 1564  | 1466  | 1504  | 1.0 | 0.8 | 1.0 | 1.0 |
| USP6NL     | 2685  | 2615  | 2606  | 2065  | 2160  | 2167  | 2588  | 2628  | 2636  | 2524  | 2519  | 1.0 | 0.8 | 1.0 | 1.0 |

**CLUSTER 4**

**Normalised Expression**

**Mean Expression Difference**

| Gene     | MCF7    |       |       |          |       |       | Y537S   |       |       |          |       |     | MCF7    |          |         |          | Y537S   |          |         |          |
|----------|---------|-------|-------|----------|-------|-------|---------|-------|-------|----------|-------|-----|---------|----------|---------|----------|---------|----------|---------|----------|
|          | Vehicle |       |       | Estrogen |       |       | Vehicle |       |       | Estrogen |       |     | Vehicle | Estrogen | Vehicle | Estrogen | Vehicle | Estrogen | Vehicle | Estrogen |
|          | 1       | 2     | 3     | 1        | 2     | 3     | 1       | 2     | 3     | 1        | 2     | 3   |         |          |         |          |         |          |         |          |
| STK40    | 1513    | 1510  | 1568  | 1239     | 1230  | 1155  | 1352    | 1293  | 1313  | 1220     | 1172  | 1.0 | 0.8     | 0.9      | 0.8     |          |         |          |         |          |
| NOTCH3   | 15108   | 14993 | 15793 | 12779    | 12453 | 11856 | 13332   | 13505 | 12863 | 12078    | 11552 | 1.0 | 0.8     | 0.9      | 0.8     |          |         |          |         |          |
| TCF7L2   | 1193    | 1083  | 1245  | 946      | 908   | 891   | 992     | 922   | 1011  | 920      | 772   | 1.0 | 0.8     | 0.8      | 0.7     |          |         |          |         |          |
| KIAA0226 | 2257    | 2096  | 2296  | 1906     | 1794  | 1741  | 2007    | 1963  | 2024  | 1809     | 1699  | 1.0 | 0.8     | 0.9      | 0.8     |          |         |          |         |          |
| PPP1R13L | 2132    | 2240  | 2272  | 1861     | 1722  | 1783  | 1860    | 1938  | 1952  | 1805     | 1581  | 1.0 | 0.8     | 0.9      | 0.8     |          |         |          |         |          |



|              |            |            |            |            |            |            |            |            |            |            |            |            |            |            |            |
|--------------|------------|------------|------------|------------|------------|------------|------------|------------|------------|------------|------------|------------|------------|------------|------------|
| MIDN         | 7175       | 7566       | 8024       | 5983       | 5732       | 6142       | 6196       | 6471       | 6514       | 6039       | 5675       | 1.0        | 0.8        | 0.8        | 0.8        |
| ID2          | 1297       | 1303       | 1271       | 1111       | 982        | 1100       | 1105       | 1111       | 1142       | 991        | 923        | 1.0        | 0.8        | 0.9        | 0.7        |
| BSDC1        | 1567       | 1536       | 1576       | 1345       | 1229       | 1411       | 1415       | 1413       | 1428       | 1250       | 1181       | 1.0        | 0.9        | 0.9        | 0.8        |
| SPIRE2       | 1227       | 1358       | 1211       | 817        | 801        | 857        | 990        | 1056       | 1099       | 670        | 636        | 1.0        | 0.7        | 0.8        | 0.5        |
| RAB3D        | 3428       | 3249       | 3347       | 2443       | 2317       | 2441       | 2826       | 2702       | 2839       | 1919       | 2009       | 1.0        | 0.7        | 0.8        | 0.6        |
| YPEL2        | 1448       | 1404       | 1442       | 1212       | 1166       | 1172       | 1279       | 1232       | 1367       | 989        | 1112       | 1.0        | 0.8        | 0.9        | 0.7        |
| SMIM5        | 163        | 218        | 191        | 111        | 115        | 119        | 114        | 134        | 128        | 73         | 95         | 1.0        | 0.6        | 0.7        | 0.4        |
| <b>IL1R1</b> | <b>673</b> | <b>772</b> | <b>864</b> | <b>526</b> | <b>483</b> | <b>588</b> | <b>563</b> | <b>567</b> | <b>589</b> | <b>328</b> | <b>342</b> | <b>1.0</b> | <b>0.7</b> | <b>0.7</b> | <b>0.4</b> |
| LXN          | 5439       | 5512       | 5463       | 4530       | 4440       | 4482       | 5112       | 5289       | 4598       | 3977       | 4256       | 1.0        | 0.8        | 0.9        | 0.8        |
| SERPINB1     | 845        | 961        | 864        | 674        | 593        | 672        | 740        | 755        | 669        | 573        | 567        | 1.0        | 0.7        | 0.8        | 0.6        |
| ATP1B1       | 12853      | 13076      | 12995      | 8642       | 8982       | 9020       | 9493       | 10307      | 9163       | 8462       | 8574       | 1.0        | 0.7        | 0.7        | 0.7        |
| PLCB3        | 4673       | 4550       | 4685       | 3776       | 3724       | 3851       | 3853       | 4112       | 3843       | 3714       | 3564       | 1.0        | 0.8        | 0.8        | 0.8        |
| CYTH2        | 2262       | 2222       | 2177       | 1644       | 1584       | 1683       | 1833       | 1841       | 1788       | 1633       | 1569       | 1.0        | 0.7        | 0.8        | 0.7        |
| GJB2         | 327        | 287        | 300        | 149        | 187        | 215        | 211        | 228        | 189        | 153        | 159        | 1.0        | 0.6        | 0.7        | 0.5        |
| NEK7         | 2137       | 2098       | 2091       | 1655       | 1792       | 1744       | 1783       | 1899       | 1698       | 1681       | 1690       | 1.0        | 0.8        | 0.9        | 0.8        |
| YPEL5        | 2924       | 3098       | 2986       | 2300       | 2404       | 2383       | 2523       | 2692       | 2346       | 2185       | 2147       | 1.0        | 0.8        | 0.8        | 0.7        |
| FER1L4       | 1005       | 996        | 995        | 779        | 810        | 830        | 877        | 950        | 834        | 790        | 786        | 1.0        | 0.8        | 0.9        | 0.8        |
| MBOAT2       | 3584       | 3471       | 3498       | 2828       | 2884       | 2909       | 3050       | 3263       | 2923       | 2656       | 2716       | 1.0        | 0.8        | 0.9        | 0.8        |
| ELL          | 738        | 719        | 706        | 629        | 531        | 602        | 619        | 567        | 570        | 569        | 566        | 1.0        | 0.8        | 0.8        | 0.8        |
| ARMC7        | 953        | 894        | 903        | 793        | 735        | 788        | 787        | 738        | 773        | 744        | 749        | 1.0        | 0.8        | 0.8        | 0.8        |
| TPST1        | 850        | 672        | 718        | 602        | 547        | 525        | 623        | 543        | 528        | 563        | 488        | 1.0        | 0.7        | 0.8        | 0.7        |
| ARL8A        | 1887       | 1976       | 1938       | 1589       | 1469       | 1496       | 1697       | 1592       | 1424       | 1453       | 1395       | 1.0        | 0.8        | 0.8        | 0.7        |
| ANKRD20A5P   | 142        | 124        | 134        | 97         | 92         | 100        | 104        | 98         | 100        | 114        | 88         | 1.0        | 0.7        | 0.8        | 0.8        |
| LRRC1        | 1632       | 1482       | 1622       | 1285       | 1247       | 1393       | 1400       | 1256       | 1327       | 1309       | 1173       | 1.0        | 0.8        | 0.8        | 0.8        |
| ICAM1        | 1038       | 1043       | 1205       | 595        | 662        | 693        | 595        | 500        | 603        | 562        | 474        | 1.0        | 0.6        | 0.5        | 0.5        |
| KCTD11       | 1609       | 1522       | 1585       | 1072       | 1134       | 1212       | 1007       | 1030       | 1025       | 1038       | 1005       | 1.0        | 0.7        | 0.6        | 0.6        |
| C2CD4C       | 187        | 213        | 218        | 111        | 140        | 126        | 122        | 114        | 116        | 128        | 99         | 1.0        | 0.6        | 0.6        | 0.6        |
| CCDC71L      | 567        | 612        | 553        | 398        | 452        | 444        | 469        | 420        | 417        | 402        | 411        | 1.0        | 0.7        | 0.8        | 0.7        |
| MOB3C        | 347        | 370        | 336        | 218        | 233        | 228        | 257        | 192        | 219        | 233        | 196        | 1.0        | 0.6        | 0.6        | 0.6        |
| PPP2CB       | 3340       | 3280       | 3151       | 2582       | 2667       | 2550       | 2508       | 2566       | 2598       | 2630       | 2508       | 1.0        | 0.8        | 0.8        | 0.8        |
| HOMER3       | 1443       | 1499       | 1400       | 1263       | 1177       | 1176       | 1206       | 1191       | 1223       | 1254       | 1206       | 1.0        | 0.8        | 0.8        | 0.8        |
| ADAM9        | 7250       | 7271       | 7350       | 5721       | 5781       | 5836       | 6304       | 6207       | 6133       | 5979       | 6070       | 1.0        | 0.8        | 0.9        | 0.8        |
| SEMA4B       | 9999       | 10082      | 10201      | 6471       | 6828       | 7206       | 7461       | 7680       | 7580       | 6878       | 6868       | 1.0        | 0.7        | 0.8        | 0.7        |
| COQ10B       | 1027       | 979        | 992        | 824        | 844        | 839        | 884        | 863        | 856        | 848        | 813        | 1.0        | 0.8        | 0.9        | 0.8        |
| TNKS1BP1     | 7129       | 7034       | 7563       | 6192       | 6172       | 6171       | 6252       | 6221       | 6252       | 6339       | 6268       | 1.0        | 0.9        | 0.9        | 0.9        |
| VASN         | 1157       | 1160       | 1236       | 857        | 911        | 906        | 945        | 900        | 919        | 920        | 918        | 1.0        | 0.8        | 0.8        | 0.8        |
| SMURF1       | 4532       | 4639       | 4681       | 3444       | 3583       | 3576       | 3673       | 3599       | 3644       | 3527       | 3575       | 1.0        | 0.8        | 0.8        | 0.8        |
| ARAP2        | 1736       | 1782       | 1934       | 1338       | 1323       | 1341       | 1509       | 1345       | 1455       | 1331       | 1321       | 1.0        | 0.7        | 0.8        | 0.7        |
| SLC12A7      | 2062       | 2098       | 2180       | 1598       | 1587       | 1528       | 1661       | 1576       | 1594       | 1558       | 1488       | 1.0        | 0.7        | 0.8        | 0.7        |
| PLEKH3       | 1600       | 1703       | 1550       | 1396       | 1360       | 1336       | 1298       | 1372       | 1423       | 1288       | 1269       | 1.0        | 0.8        | 0.8        | 0.8        |
| PVRL4        | 2011       | 2084       | 1939       | 1605       | 1307       | 1322       | 1371       | 1448       | 1513       | 1106       | 1119       | 1.0        | 0.7        | 0.7        | 0.6        |
| NFKBIA       | 3287       | 3542       | 3515       | 2897       | 2741       | 3010       | 3099       | 2945       | 3193       | 2773       | 2921       | 1.0        | 0.8        | 0.9        | 0.8        |
| SDCBP2       | 321        | 336        | 377        | 257        | 234        | 242        | 252        | 236        | 308        | 248        | 249        | 1.0        | 0.7        | 0.8        | 0.7        |
| KIAA0355     | 505        | 614        | 594        | 482        | 438        | 474        | 447        | 424        | 490        | 446        | 398        | 1.0        | 0.8        | 0.8        | 0.7        |
| PCGF3        | 4742       | 4456       | 4641       | 3904       | 3734       | 3885       | 3970       | 3828       | 3954       | 3616       | 3641       | 1.0        | 0.8        | 0.8        | 0.8        |
| PRKCD        | 2222       | 2073       | 2222       | 1738       | 1765       | 1740       | 1791       | 1624       | 1775       | 1617       | 1540       | 1.0        | 0.8        | 0.8        | 0.7        |
| DRAM1        | 2594       | 2497       | 2644       | 1870       | 1911       | 1940       | 1943       | 1785       | 1867       | 1664       | 1550       | 1.0        | 0.7        | 0.7        | 0.6        |
| C7orf43      | 1451       | 1347       | 1478       | 1152       | 1139       | 1174       | 1209       | 1109       | 1094       | 1030       | 1017       | 1.0        | 0.8        | 0.8        | 0.7        |
| TMEM189      | 4970       | 5014       | 5077       | 4188       | 4016       | 3975       | 4172       | 3880       | 3845       | 3699       | 3774       | 1.0        | 0.8        | 0.8        | 0.7        |
| TNFAIP8      | 1409       | 1427       | 1522       | 1056       | 1140       | 1112       | 1152       | 1025       | 1031       | 985        | 1004       | 1.0        | 0.8        | 0.7        | 0.7        |
| ETS2         | 3203       | 3285       | 3340       | 2419       | 2513       | 2446       | 2440       | 2421       | 2368       | 2255       | 2315       | 1.0        | 0.8        | 0.7        | 0.7        |
| MICAL1       | 1806       | 1590       | 1790       | 1327       | 1343       | 1255       | 1267       | 1282       | 1210       | 1187       | 1083       | 1.0        | 0.8        | 0.7        | 0.7        |
| TRAK1        | 2099       | 2016       | 2109       | 1694       | 1655       | 1683       | 1608       | 1667       | 1572       | 1472       | 1533       | 1.0        | 0.8        | 0.8        | 0.7        |
| EHD2         | 2495       | 2316       | 2381       | 1696       | 1703       | 1769       | 1701       | 1689       | 1614       | 1555       | 1512       | 1.0        | 0.7        | 0.7        | 0.6        |
| C22orf29     | 5538       | 5188       | 5603       | 3681       | 3707       | 3761       | 3480       | 3435       | 3545       | 3083       | 3108       | 1.0        | 0.7        | 0.6        | 0.6        |
| SH3RF1       | 2566       | 2643       | 2594       | 1796       | 1893       | 1778       | 1775       | 1620       | 1748       | 1576       | 1477       | 1.0        | 0.7        | 0.7        | 0.6        |
| EPHA2        | 3332       | 3494       | 3591       | 2078       | 2243       | 2300       | 2015       | 1940       | 2091       | 1611       | 1792       | 1.0        | 0.6        | 0.6        | 0.5        |
| GALNT1       | 8992       | 8841       | 8702       | 6885       | 7109       | 7182       | 6914       | 6900       | 6938       | 6109       | 6271       | 1.0        | 0.8        | 0.8        | 0.7        |
| MYO9B        | 3321       | 3148       | 3342       | 2781       | 2772       | 2574       | 2585       | 2545       | 2597       | 2304       | 2473       | 1.0        | 0.8        | 0.8        | 0.7        |
| ABCC3        | 14321      | 13238      | 14676      | 11368      | 11404      | 11050      | 10340      | 10285      | 10273      | 9461       | 9408       | 1.0        | 0.8        | 0.7        | 0.7        |
| FOXP4        | 4445       | 4751       | 5144       | 3695       | 3618       | 3788       | 3317       | 3393       | 3672       | 3138       | 3029       | 1.0        | 0.8        | 0.7        | 0.6        |
| ZSWIM4       | 977        | 993        | 1105       | 675        | 593        | 706        | 590        | 577        | 605        | 469        | 488        | 1.0        | 0.6        | 0.6        | 0.5        |
| CLIP2        | 1532       | 1577       | 1681       | 1133       | 1102       | 1159       | 1079       | 1014       | 1008       | 988        | 878        | 1.0        | 0.7        | 0.6        | 0.6        |
| MKNK2        | 2412       | 2404       | 2467       | 2126       | 1959       | 2058       | 1948       | 1920       | 1916       | 1875       | 1787       | 1.0        | 0.8        | 0.8        | 0.8        |
| HIVEP1       | 1277       | 1192       | 1409       | 1019       | 987        | 1033       | 996        | 1029       | 1033       | 967        | 929        | 1.0        | 0.8        | 0.8        | 0.7        |
| ZSWIM8       | 3249       | 3155       | 3353       | 2626       | 2602       | 2740       | 2407       | 2746       | 2563       | 2421       | 2336       | 1.0        | 0.8        | 0.8        | 0.7        |

|              |              |              |              |             |             |             |             |             |             |             |             |            |            |            |            |
|--------------|--------------|--------------|--------------|-------------|-------------|-------------|-------------|-------------|-------------|-------------|-------------|------------|------------|------------|------------|
| FOXA1        | 13484        | 14320        | 14717        | 11951       | 11808       | 11864       | 11604       | 12141       | 11604       | 11071       | 10872       | 1.0        | 0.8        | 0.8        | 0.8        |
| CGN          | 7550         | 7724         | 7744         | 6134        | 5921        | 5864        | 6183        | 5960        | 6191        | 5107        | 4999        | 1.0        | 0.8        | 0.8        | 0.7        |
| PINK1        | 1947         | 1983         | 2058         | 1617        | 1524        | 1519        | 1583        | 1584        | 1666        | 1323        | 1252        | 1.0        | 0.8        | 0.8        | 0.6        |
| TP53INP2     | 1183         | 1170         | 1274         | 746         | 655         | 689         | 842         | 760         | 794         | 572         | 494         | 1.0        | 0.6        | 0.7        | 0.4        |
| PPL          | 6800         | 7225         | 7264         | 4682        | 4680        | 4548        | 5198        | 5248        | 5317        | 3913        | 3760        | 1.0        | 0.7        | 0.7        | 0.5        |
| ARID3A       | 1727         | 1724         | 1978         | 1339        | 1444        | 1274        | 1399        | 1353        | 1346        | 1162        | 1148        | 1.0        | 0.7        | 0.8        | 0.6        |
| CAB39        | 5290         | 5370         | 5279         | 4144        | 4322        | 4150        | 4516        | 4365        | 4384        | 3804        | 3917        | 1.0        | 0.8        | 0.8        | 0.7        |
| HID1         | 6387         | 6422         | 6327         | 5109        | 4955        | 5170        | 5295        | 5347        | 5195        | 4736        | 4573        | 1.0        | 0.8        | 0.8        | 0.7        |
| PCDH1        | 4313         | 4464         | 4444         | 2788        | 2787        | 2865        | 2991        | 3123        | 2955        | 2389        | 2384        | 1.0        | 0.6        | 0.7        | 0.5        |
| PRSS8        | 2733         | 2754         | 2649         | 2025        | 1961        | 1973        | 2100        | 2114        | 1945        | 1770        | 1807        | 1.0        | 0.7        | 0.8        | 0.7        |
| MCL1         | 27541        | 29135        | 28158        | 21101       | 21788       | 22426       | 21048       | 21373       | 21474       | 19408       | 19608       | 1.0        | 0.8        | 0.8        | 0.7        |
| SPAG9        | 7119         | 7217         | 7200         | 5471        | 5809        | 5714        | 5677        | 5647        | 5804        | 5265        | 5172        | 1.0        | 0.8        | 0.8        | 0.7        |
| IER5         | 6802         | 7293         | 7331         | 4822        | 5010        | 5244        | 4865        | 5294        | 5156        | 4591        | 4564        | 1.0        | 0.7        | 0.7        | 0.6        |
| TEP1         | 1989         | 2005         | 2053         | 1528        | 1616        | 1645        | 1539        | 1626        | 1568        | 1456        | 1467        | 1.0        | 0.8        | 0.8        | 0.7        |
| EPHB3        | 1638         | 1612         | 1685         | 1152        | 1109        | 1174        | 1089        | 1253        | 1165        | 950         | 963         | 1.0        | 0.7        | 0.7        | 0.6        |
| SPINT1       | 10372        | 10233        | 10605        | 8140        | 8154        | 8189        | 7902        | 8313        | 8036        | 7148        | 7056        | 1.0        | 0.8        | 0.8        | 0.7        |
| BCAR3        | 1877         | 1813         | 1794         | 1278        | 1236        | 1312        | 1261        | 1329        | 1303        | 1107        | 1149        | 1.0        | 0.7        | 0.7        | 0.6        |
| MYH14        | 20399        | 21073        | 21164        | 16242       | 15891       | 15931       | 15743       | 16315       | 17108       | 14457       | 13940       | 1.0        | 0.8        | 0.8        | 0.7        |
| PLXNB2       | 18673        | 19006        | 19496        | 15634       | 15073       | 15326       | 14847       | 15464       | 15392       | 13983       | 13126       | 1.0        | 0.8        | 0.8        | 0.7        |
| THBD         | 3576         | 3714         | 3999         | 2870        | 2789        | 2957        | 2832        | 3030        | 2897        | 2265        | 2411        | 1.0        | 0.8        | 0.8        | 0.6        |
| TRAF4        | 3837         | 4051         | 4110         | 3100        | 3117        | 3208        | 3073        | 3168        | 3010        | 2519        | 2554        | 1.0        | 0.8        | 0.8        | 0.6        |
| ZDHHC7       | 9808         | 9995         | 9992         | 7258        | 7268        | 7639        | 7628        | 7358        | 7328        | 6081        | 6088        | 1.0        | 0.7        | 0.7        | 0.6        |
| SAMD4A       | 2839         | 2757         | 2959         | 2335        | 2386        | 2581        | 2396        | 2371        | 2440        | 2133        | 2220        | 1.0        | 0.9        | 0.8        | 0.8        |
| SRC          | 3008         | 2940         | 3163         | 2397        | 2536        | 2578        | 2456        | 2472        | 2457        | 2243        | 2152        | 1.0        | 0.8        | 0.8        | 0.7        |
| TRIM16       | 2603         | 2613         | 2734         | 2053        | 2209        | 2263        | 2383        | 2201        | 2177        | 1914        | 1974        | 1.0        | 0.8        | 0.9        | 0.7        |
| CPEB4        | 1537         | 1558         | 1708         | 1178        | 1196        | 1304        | 1300        | 1305        | 1294        | 1059        | 1137        | 1.0        | 0.8        | 0.8        | 0.7        |
| TSC22D1      | 5329         | 5245         | 5444         | 4283        | 4350        | 4646        | 4681        | 4694        | 4713        | 4156        | 4085        | 1.0        | 0.8        | 0.9        | 0.8        |
| SORBS3       | 930          | 971          | 1004         | 715         | 744         | 824         | 763         | 786         | 796         | 692         | 675         | 1.0        | 0.8        | 0.8        | 0.7        |
| PACSIN1      | 632          | 633          | 637          | 425         | 492         | 461         | 474         | 464         | 428         | 367         | 290         | 1.0        | 0.7        | 0.7        | 0.5        |
| GPR157       | 395          | 439          | 388          | 294         | 321         | 324         | 331         | 341         | 314         | 300         | 258         | 1.0        | 0.8        | 0.8        | 0.7        |
| EFNA2        | 88           | 106          | 98           | 52          | 58          | 83          | 53          | 57          | 50          | 44          | 29          | 1.0        | 0.7        | 0.5        | 0.4        |
| TRIP10       | 1850         | 1969         | 1845         | 1570        | 1526        | 1514        | 1470        | 1453        | 1478        | 1399        | 1241        | 1.0        | 0.8        | 0.8        | 0.7        |
| PHLDA3       | 5405         | 6002         | 5734         | 4529        | 4595        | 4698        | 4358        | 4679        | 4591        | 4272        | 3834        | 1.0        | 0.8        | 0.8        | 0.7        |
| GDPGP1       | 1256         | 1364         | 1178         | 876         | 931         | 969         | 860         | 889         | 863         | 920         | 745         | 1.0        | 0.7        | 0.7        | 0.7        |
| <b>EFNA1</b> | <b>2612</b>  | <b>2727</b>  | <b>2755</b>  | <b>2335</b> | <b>2221</b> | <b>2326</b> | <b>1993</b> | <b>2048</b> | <b>2022</b> | <b>1577</b> | <b>1532</b> | <b>1.0</b> | <b>0.9</b> | <b>0.7</b> | <b>0.6</b> |
| <b>MXD4</b>  | <b>7934</b>  | <b>8088</b>  | <b>8420</b>  | <b>7050</b> | <b>6757</b> | <b>6817</b> | <b>6423</b> | <b>6554</b> | <b>6614</b> | <b>5306</b> | <b>5345</b> | <b>1.0</b> | <b>0.8</b> | <b>0.8</b> | <b>0.7</b> |
| USP43        | 837          | 833          | 901          | 719         | 629         | 702         | 611         | 622         | 584         | 454         | 494         | 1.0        | 0.8        | 0.7        | 0.6        |
| AKAP8L       | 2276         | 2250         | 2485         | 1973        | 1930        | 2016        | 1826        | 1923        | 1761        | 1638        | 1491        | 1.0        | 0.8        | 0.8        | 0.7        |
| GET4         | 274          | 281          | 301          | 262         | 211         | 212         | 203         | 227         | 210         | 156         | 133         | 1.0        | 0.8        | 0.7        | 0.5        |
| JDP2         | 1178         | 1197         | 1135         | 976         | 954         | 1011        | 814         | 859         | 892         | 667         | 719         | 1.0        | 0.8        | 0.7        | 0.6        |
| SH2D4A       | 1532         | 1531         | 1413         | 1222        | 1111        | 1190        | 1054        | 1088        | 1095        | 721         | 831         | 1.0        | 0.8        | 0.7        | 0.5        |
| FAM160B1     | 1391         | 1419         | 1395         | 1190        | 1194        | 1201        | 1123        | 1108        | 1226        | 950         | 1033        | 1.0        | 0.9        | 0.8        | 0.7        |
| FILIP1L      | 4220         | 4030         | 4179         | 3265        | 3226        | 3302        | 3366        | 3148        | 3183        | 2411        | 2528        | 1.0        | 0.8        | 0.8        | 0.6        |
| DKK1         | 14655        | 14986        | 14429        | 11955       | 11917       | 11965       | 12114       | 11808       | 12246       | 8783        | 9182        | 1.0        | 0.8        | 0.8        | 0.6        |
| C2orf54      | 276          | 246          | 261          | 169         | 154         | 137         | 108         | 90          | 104         | 31          | 34          | 1.0        | 0.6        | 0.4        | 0.1        |
| <b>TGFB2</b> | <b>10420</b> | <b>10117</b> | <b>10057</b> | <b>7335</b> | <b>7720</b> | <b>7327</b> | <b>6364</b> | <b>5872</b> | <b>6297</b> | <b>4244</b> | <b>4229</b> | <b>1.0</b> | <b>0.7</b> | <b>0.6</b> | <b>0.4</b> |
| CERK         | 964          | 883          | 951          | 778         | 729         | 771         | 727         | 685         | 741         | 548         | 525         | 1.0        | 0.8        | 0.8        | 0.6        |
| MFI2         | 333          | 328          | 387          | 290         | 281         | 249         | 225         | 269         | 288         | 214         | 192         | 1.0        | 0.8        | 0.7        | 0.6        |
| ARL4C        | 457          | 436          | 429          | 289         | 309         | 318         | 256         | 262         | 327         | 237         | 209         | 1.0        | 0.7        | 0.6        | 0.5        |
| IRX5         | 791          | 855          | 830          | 681         | 692         | 676         | 514         | 555         | 603         | 492         | 429         | 1.0        | 0.8        | 0.7        | 0.6        |
| TMEM156      | 88           | 93           | 104          | 60          | 63          | 60          | 39          | 37          | 41          | 31          | 23          | 1.0        | 0.6        | 0.4        | 0.3        |
| CSRNP1       | 875          | 873          | 984          | 599         | 563         | 615         | 440         | 462         | 465         | 397         | 305         | 1.0        | 0.7        | 0.5        | 0.4        |
| SPECC1       | 4745         | 4813         | 4730         | 3882        | 3986        | 4211        | 3557        | 3450        | 3571        | 3262        | 3096        | 1.0        | 0.8        | 0.7        | 0.7        |
| <b>ARNT2</b> | <b>4145</b>  | <b>3882</b>  | <b>4092</b>  | <b>2979</b> | <b>3063</b> | <b>3335</b> | <b>2244</b> | <b>2169</b> | <b>2493</b> | <b>1981</b> | <b>1887</b> | <b>1.0</b> | <b>0.8</b> | <b>0.6</b> | <b>0.5</b> |
| ETNK2        | 962          | 913          | 943          | 649         | 641         | 727         | 500         | 463         | 530         | 366         | 379         | 1.0        | 0.7        | 0.5        | 0.4        |
| LINC00152    | 676          | 679          | 546          | 422         | 419         | 470         | 266         | 215         | 294         | 214         | 216         | 1.0        | 0.7        | 0.4        | 0.3        |
| RCAN1        | 953          | 918          | 858          | 692         | 677         | 753         | 646         | 498         | 569         | 535         | 511         | 1.0        | 0.8        | 0.6        | 0.6        |
| PLEKHG1      | 325          | 244          | 270          | 217         | 228         | 203         | 171         | 140         | 154         | 134         | 119         | 1.0        | 0.8        | 0.6        | 0.5        |
| GOLGA7B      | 372          | 310          | 285          | 192         | 224         | 239         | 162         | 152         | 148         | 140         | 104         | 1.0        | 0.7        | 0.5        | 0.4        |
| EFHD1        | 191          | 221          | 191          | 139         | 134         | 134         | 127         | 71          | 100         | 75          | 37          | 1.0        | 0.7        | 0.5        | 0.3        |
| PLEKHM1P     | 670          | 688          | 699          | 558         | 553         | 634         | 573         | 498         | 451         | 403         | 374         | 1.0        | 0.8        | 0.7        | 0.6        |
| ZC3H12A      | 838          | 862          | 869          | 629         | 679         | 685         | 674         | 579         | 584         | 482         | 521         | 1.0        | 0.8        | 0.7        | 0.6        |
| VPS54        | 1870         | 1991         | 1995         | 1529        | 1619        | 1662        | 1532        | 1390        | 1386        | 1076        | 1257        | 1.0        | 0.8        | 0.7        | 0.6        |
| TBC1D10A     | 760          | 837          | 822          | 639         | 600         | 658         | 649         | 644         | 609         | 631         | 633         | 1.0        | 0.8        | 0.8        | 0.8        |
| ZNF143       | 553          | 618          | 613          | 522         | 449         | 494         | 503         | 449         | 470         | 479         | 486         | 1.0        | 0.8        | 0.8        | 0.8        |
| SUV420H2     | 422          | 512          | 469          | 420         | 378         | 364         | 432         | 366         | 340         | 343         | 389         | 1.0        | 0.8        | 0.8        | 0.8        |

|          |       |       |       |       |       |       |       |       |       |       |       |     |     |     |     |
|----------|-------|-------|-------|-------|-------|-------|-------|-------|-------|-------|-------|-----|-----|-----|-----|
| ERICH1   | 413   | 387   | 376   | 291   | 336   | 322   | 301   | 315   | 294   | 351   | 326   | 1.0 | 0.8 | 0.8 | 0.9 |
| LIF      | 1809  | 1700  | 1905  | 1073  | 1162  | 1227  | 1049  | 1046  | 1058  | 1300  | 1208  | 1.0 | 0.6 | 0.6 | 0.7 |
| BHLHE40  | 3960  | 3937  | 4170  | 2558  | 2628  | 2752  | 2501  | 2732  | 2425  | 2633  | 2630  | 1.0 | 0.7 | 0.6 | 0.7 |
| KLF13    | 1832  | 1835  | 1866  | 1394  | 1389  | 1512  | 1391  | 1396  | 1408  | 1470  | 1398  | 1.0 | 0.8 | 0.8 | 0.8 |
| GPER1    | 177   | 211   | 185   | 125   | 122   | 164   | 122   | 130   | 104   | 145   | 128   | 1.0 | 0.7 | 0.6 | 0.7 |
| ERO1L    | 4665  | 4542  | 4567  | 3462  | 3553  | 3458  | 3372  | 3702  | 3444  | 3480  | 3931  | 1.0 | 0.8 | 0.8 | 0.8 |
| TMEM45A  | 447   | 462   | 452   | 288   | 331   | 317   | 284   | 283   | 265   | 246   | 302   | 1.0 | 0.7 | 0.6 | 0.6 |
| EGR2     | 552   | 624   | 638   | 215   | 304   | 309   | 205   | 285   | 208   | 236   | 230   | 1.0 | 0.5 | 0.4 | 0.4 |
| ANGPTL4  | 1634  | 1645  | 1750  | 879   | 989   | 1026  | 824   | 1022  | 811   | 864   | 900   | 1.0 | 0.6 | 0.5 | 0.5 |
| HSBP1L1  | 535   | 447   | 451   | 370   | 361   | 354   | 351   | 368   | 284   | 302   | 339   | 1.0 | 0.8 | 0.7 | 0.7 |
| CPM      | 772   | 708   | 750   | 624   | 653   | 614   | 592   | 576   | 513   | 531   | 646   | 1.0 | 0.8 | 0.8 | 0.8 |
| SERINC5  | 922   | 811   | 899   | 714   | 696   | 704   | 560   | 634   | 585   | 594   | 568   | 1.0 | 0.8 | 0.7 | 0.7 |
| MAPK11   | 698   | 577   | 706   | 497   | 501   | 468   | 310   | 397   | 342   | 327   | 289   | 1.0 | 0.7 | 0.5 | 0.5 |
| ARHGEF18 | 885   | 859   | 924   | 738   | 734   | 721   | 560   | 696   | 575   | 593   | 630   | 1.0 | 0.8 | 0.7 | 0.7 |
| PLCH2    | 131   | 134   | 145   | 91    | 99    | 62    | 54    | 78    | 43    | 50    | 34    | 1.0 | 0.6 | 0.4 | 0.3 |
| LIMD2    | 305   | 329   | 297   | 233   | 255   | 211   | 189   | 239   | 177   | 191   | 177   | 1.0 | 0.8 | 0.7 | 0.6 |
| GPRC5C   | 1869  | 1842  | 1803  | 1583  | 1624  | 1418  | 1295  | 1485  | 1385  | 1119  | 1312  | 1.0 | 0.8 | 0.8 | 0.7 |
| TAGLN    | 2702  | 2703  | 2594  | 2095  | 2102  | 2145  | 596   | 563   | 515   | 469   | 487   | 1.0 | 0.8 | 0.2 | 0.2 |
| TGFBI    | 4274  | 4108  | 4271  | 3044  | 3124  | 3021  | 635   | 541   | 537   | 428   | 434   | 1.0 | 0.7 | 0.1 | 0.1 |
| AMPH     | 900   | 912   | 948   | 659   | 653   | 634   | 18    | 11    | 10    | 7     | 5     | 1.0 | 0.7 | 0.0 | 0.0 |
| ANKRD34B | 962   | 912   | 891   | 728   | 751   | 778   | 92    | 92    | 85    | 61    | 81    | 1.0 | 0.8 | 0.1 | 0.1 |
| IGFL1    | 545   | 445   | 489   | 349   | 327   | 263   | 18    | 10    | 21    | 10    | 15    | 1.0 | 0.6 | 0.0 | 0.0 |
| PRKCA    | 3523  | 3231  | 3493  | 2897  | 3008  | 2856  | 1150  | 1185  | 1272  | 1079  | 1239  | 1.0 | 0.9 | 0.4 | 0.3 |
| FOXI1    | 225   | 191   | 205   | 149   | 128   | 144   | 22    | 19    | 20    | 8     | 15    | 1.0 | 0.7 | 0.1 | 0.1 |
| UBE2QL1  | 1931  | 1875  | 1882  | 1085  | 1200  | 1168  | 128   | 115   | 92    | 51    | 90    | 1.0 | 0.6 | 0.1 | 0.0 |
| CSRP1    | 25575 | 25297 | 25029 | 20461 | 20280 | 20538 | 7685  | 7466  | 7696  | 6232  | 6378  | 1.0 | 0.8 | 0.3 | 0.2 |
| SOCS2    | 1951  | 1927  | 1852  | 1631  | 1652  | 1587  | 590   | 548   | 596   | 464   | 514   | 1.0 | 0.8 | 0.3 | 0.3 |
| BASP1    | 7689  | 7627  | 7812  | 6673  | 6413  | 6220  | 3339  | 3407  | 3189  | 2835  | 2873  | 1.0 | 0.8 | 0.4 | 0.4 |
| NPAS2    | 1735  | 1664  | 1754  | 1496  | 1487  | 1369  | 824   | 722   | 756   | 642   | 675   | 1.0 | 0.8 | 0.4 | 0.4 |
| DIO2-AS1 | 1288  | 1303  | 1490  | 1223  | 1127  | 1023  | 376   | 395   | 427   | 248   | 273   | 1.0 | 0.8 | 0.3 | 0.2 |
| FBN2     | 1567  | 1687  | 1648  | 1397  | 1372  | 1359  | 350   | 316   | 349   | 206   | 217   | 1.0 | 0.8 | 0.2 | 0.1 |
| DIO2     | 83175 | 77614 | 80850 | 64414 | 65642 | 62630 | 22644 | 21661 | 22329 | 15681 | 16428 | 1.0 | 0.8 | 0.3 | 0.2 |
| NR2F1    | 420   | 355   | 413   | 289   | 251   | 332   | 43    | 58    | 54    | 33    | 50    | 1.0 | 0.7 | 0.1 | 0.1 |
| GPR98    | 1894  | 2074  | 2012  | 1536  | 1630  | 1601  | 489   | 560   | 556   | 477   | 483   | 1.0 | 0.8 | 0.3 | 0.2 |
| FAM84A   | 904   | 923   | 951   | 743   | 778   | 717   | 191   | 254   | 254   | 178   | 203   | 1.0 | 0.8 | 0.3 | 0.2 |
| ACTG2    | 482   | 488   | 525   | 348   | 388   | 470   | 16    | 29    | 34    | 17    | 8     | 1.0 | 0.8 | 0.1 | 0.0 |
| WTIP     | 650   | 705   | 666   | 512   | 558   | 591   | 220   | 193   | 195   | 178   | 165   | 1.0 | 0.8 | 0.3 | 0.3 |
| MMP9     | 3763  | 3556  | 3723  | 1894  | 2170  | 2205  | 116   | 91    | 112   | 93    | 62    | 1.0 | 0.6 | 0.0 | 0.0 |
| SLCO2A1  | 4806  | 4664  | 5020  | 3187  | 3306  | 3272  | 558   | 489   | 594   | 433   | 379   | 1.0 | 0.7 | 0.1 | 0.1 |
| C4orf26  | 1556  | 1587  | 1371  | 1075  | 1134  | 1155  | 203   | 197   | 220   | 156   | 136   | 1.0 | 0.7 | 0.1 | 0.1 |
| PRKAR2B  | 1960  | 1960  | 1902  | 1612  | 1515  | 1607  | 614   | 586   | 627   | 613   | 489   | 1.0 | 0.8 | 0.3 | 0.3 |
| HMOX1    | 378   | 332   | 366   | 278   | 290   | 296   | 138   | 154   | 200   | 127   | 135   | 1.0 | 0.8 | 0.5 | 0.4 |
| C3orf36  | 181   | 191   | 176   | 105   | 109   | 78    | 6     | 1     | 17    | 2     | 0     | 1.0 | 0.5 | 0.0 | 0.0 |
| VIPR2    | 229   | 245   | 260   | 200   | 205   | 180   | 77    | 70    | 99    | 60    | 75    | 1.0 | 0.8 | 0.3 | 0.3 |
| CCNYL1   | 1508  | 1332  | 1426  | 1125  | 1281  | 1171  | 840   | 911   | 909   | 853   | 810   | 1.0 | 0.8 | 0.6 | 0.6 |
| PDZD2    | 158   | 132   | 176   | 91    | 109   | 108   | 33    | 58    | 47    | 38    | 33    | 1.0 | 0.7 | 0.3 | 0.2 |
| SPIRE1   | 5275  | 5034  | 5494  | 4282  | 4411  | 4459  | 3225  | 3152  | 3267  | 3060  | 3108  | 1.0 | 0.8 | 0.6 | 0.6 |
| PLEKHH2  | 1308  | 1120  | 1266  | 725   | 835   | 801   | 348   | 335   | 392   | 279   | 286   | 1.0 | 0.6 | 0.3 | 0.2 |
| PTK2B    | 438   | 316   | 409   | 247   | 283   | 268   | 93    | 105   | 97    | 83    | 89    | 1.0 | 0.7 | 0.3 | 0.2 |
| ADM2     | 189   | 157   | 220   | 129   | 140   | 147   | 49    | 44    | 57    | 34    | 42    | 1.0 | 0.7 | 0.3 | 0.2 |
| SLC4A3   | 591   | 482   | 573   | 417   | 421   | 484   | 250   | 274   | 283   | 240   | 280   | 1.0 | 0.8 | 0.5 | 0.5 |
| AHNAK2   | 1267  | 1297  | 1358  | 1078  | 1160  | 1105  | 900   | 821   | 985   | 773   | 772   | 1.0 | 0.9 | 0.7 | 0.6 |
| TRAM2    | 2209  | 2150  | 2423  | 1923  | 1927  | 1862  | 1459  | 1428  | 1578  | 1271  | 1200  | 1.0 | 0.8 | 0.7 | 0.5 |
| PLEKHG4B | 167   | 174   | 193   | 139   | 130   | 107   | 70    | 55    | 68    | 37    | 38    | 1.0 | 0.7 | 0.4 | 0.2 |
| SOWAHB   | 1442  | 1448  | 1482  | 1150  | 1031  | 1087  | 627   | 644   | 682   | 486   | 480   | 1.0 | 0.7 | 0.4 | 0.3 |
| TACC1    | 5763  | 5678  | 5628  | 4890  | 4727  | 4613  | 3036  | 2858  | 3364  | 2368  | 2384  | 1.0 | 0.8 | 0.5 | 0.4 |
| MUC3A    | 1004  | 988   | 1038  | 693   | 668   | 731   | 279   | 294   | 306   | 184   | 129   | 1.0 | 0.7 | 0.3 | 0.2 |
| ACHE     | 4667  | 4309  | 4700  | 2829  | 2816  | 2872  | 923   | 848   | 1006  | 540   | 434   | 1.0 | 0.6 | 0.2 | 0.1 |
| PRICKLE1 | 1068  | 996   | 965   | 775   | 807   | 797   | 529   | 398   | 527   | 344   | 348   | 1.0 | 0.8 | 0.5 | 0.3 |
| STON1    | 444   | 479   | 422   | 372   | 377   | 373   | 201   | 169   | 202   | 119   | 123   | 1.0 | 0.8 | 0.4 | 0.3 |
| SALL4    | 161   | 202   | 172   | 118   | 125   | 121   | 53    | 48    | 61    | 42    | 21    | 1.0 | 0.7 | 0.3 | 0.2 |
| MROH2A   | 244   | 268   | 268   | 181   | 180   | 174   | 118   | 83    | 107   | 85    | 63    | 1.0 | 0.7 | 0.4 | 0.3 |
| SCARA3   | 1152  | 1268  | 1321  | 1032  | 933   | 956   | 758   | 696   | 819   | 560   | 560   | 1.0 | 0.8 | 0.6 | 0.4 |
| SYNGR3   | 712   | 811   | 776   | 632   | 568   | 590   | 494   | 434   | 447   | 364   | 358   | 1.0 | 0.8 | 0.6 | 0.5 |
| GRHL3    | 1974  | 2014  | 2028  | 1217  | 1203  | 1176  | 657   | 614   | 717   | 379   | 323   | 1.0 | 0.6 | 0.3 | 0.2 |
| LMCD1    | 1768  | 1986  | 1910  | 1236  | 1217  | 1188  | 737   | 697   | 780   | 514   | 475   | 1.0 | 0.6 | 0.4 | 0.3 |

|              |              |              |              |              |              |              |              |              |              |              |              |            |            |            |            |
|--------------|--------------|--------------|--------------|--------------|--------------|--------------|--------------|--------------|--------------|--------------|--------------|------------|------------|------------|------------|
| N4BP3        | 4791         | 5003         | 5188         | 3509         | 3265         | 3595         | 2430         | 2514         | 2500         | 1717         | 1647         | 1.0        | 0.7        | 0.5        | 0.3        |
| IDH2         | 15173        | 15598        | 15649        | 13122        | 13040        | 13448        | 11402        | 11413        | 11618        | 10143        | 9955         | 1.0        | 0.9        | 0.7        | 0.6        |
| SNAI2        | 802          | 777          | 743          | 597          | 683          | 623          | 471          | 525          | 511          | 385          | 395          | 1.0        | 0.8        | 0.6        | 0.5        |
| CHKA         | 1862         | 1801         | 1857         | 1517         | 1526         | 1492         | 1266         | 1247         | 1239         | 1053         | 1134         | 1.0        | 0.8        | 0.7        | 0.6        |
| LIMA1        | 2193         | 2107         | 2090         | 1511         | 1488         | 1506         | 1088         | 1007         | 895          | 706          | 806          | 1.0        | 0.7        | 0.5        | 0.4        |
| <b>ANXA3</b> | <b>5462</b>  | <b>5380</b>  | <b>4844</b>  | <b>3987</b>  | <b>3831</b>  | <b>4024</b>  | <b>3078</b>  | <b>2929</b>  | <b>3072</b>  | <b>2332</b>  | <b>2411</b>  | <b>1.0</b> | <b>0.8</b> | <b>0.6</b> | <b>0.5</b> |
| ATG16L1      | 3126         | 2951         | 2873         | 2496         | 2526         | 2580         | 2189         | 2221         | 2180         | 1843         | 1909         | 1.0        | 0.8        | 0.7        | 0.6        |
| <b>MYO1B</b> | <b>24177</b> | <b>24202</b> | <b>24060</b> | <b>19768</b> | <b>20586</b> | <b>20152</b> | <b>15951</b> | <b>15185</b> | <b>15720</b> | <b>11978</b> | <b>12811</b> | <b>1.0</b> | <b>0.8</b> | <b>0.6</b> | <b>0.5</b> |
| IFFO2        | 703          | 676          | 649          | 515          | 565          | 515          | 338          | 337          | 357          | 241          | 293          | 1.0        | 0.8        | 0.5        | 0.4        |
| NBEA         | 1941         | 1783         | 1935         | 1413         | 1523         | 1419         | 958          | 966          | 1038         | 773          | 770          | 1.0        | 0.8        | 0.5        | 0.4        |
| GALNT10      | 20865        | 20372        | 20650        | 16590        | 16332        | 16341        | 11624        | 11615        | 11647        | 9315         | 9624         | 1.0        | 0.8        | 0.6        | 0.5        |
| ARHGAP5      | 6075         | 6177         | 6133         | 5172         | 5298         | 5125         | 4093         | 4065         | 4142         | 3545         | 3662         | 1.0        | 0.8        | 0.7        | 0.6        |
| ZFAND3       | 4623         | 4678         | 4523         | 3969         | 3876         | 3955         | 3241         | 3269         | 3347         | 3067         | 2963         | 1.0        | 0.9        | 0.7        | 0.7        |
| JUP          | 30062        | 30006        | 30307        | 25243        | 24180        | 24275        | 20346        | 20284        | 19979        | 18280        | 17960        | 1.0        | 0.8        | 0.7        | 0.6        |
| TRAFD1       | 4080         | 3988         | 3956         | 3231         | 3070         | 2965         | 2282         | 2338         | 2288         | 1963         | 1908         | 1.0        | 0.8        | 0.6        | 0.5        |
| ID3          | 3888         | 3906         | 3835         | 3419         | 3117         | 3035         | 2347         | 2412         | 2432         | 2127         | 2107         | 1.0        | 0.8        | 0.6        | 0.5        |
| DNAJC22      | 4209         | 4312         | 4410         | 2807         | 2808         | 2875         | 1605         | 1592         | 1518         | 1244         | 1128         | 1.0        | 0.7        | 0.4        | 0.3        |
| MTSS1L       | 12206        | 12338        | 12582        | 10256        | 9741         | 9935         | 7816         | 7811         | 7448         | 7110         | 6923         | 1.0        | 0.8        | 0.6        | 0.6        |
| RHOBTB2      | 2328         | 2231         | 2457         | 1846         | 1651         | 1885         | 1213         | 1163         | 1260         | 1046         | 1082         | 1.0        | 0.8        | 0.5        | 0.5        |
| MIR4435-1HG  | 1461         | 1499         | 1433         | 1111         | 1050         | 1212         | 645          | 695          | 715          | 614          | 587          | 1.0        | 0.8        | 0.5        | 0.4        |
| HBEGF        | 1670         | 1779         | 1656         | 789          | 829          | 986          | 273          | 306          | 347          | 240          | 236          | 1.0        | 0.5        | 0.2        | 0.1        |
| KRT80        | 123697       | 117708       | 123820       | 92040        | 94237        | 93537        | 64967        | 63343        | 64155        | 53816        | 54199        | 1.0        | 0.8        | 0.5        | 0.4        |
| PXN          | 30681        | 29495        | 30744        | 23218        | 23927        | 23916        | 16331        | 15963        | 16209        | 14336        | 14351        | 1.0        | 0.8        | 0.5        | 0.5        |
| RAPGEF2      | 3205         | 3146         | 3250         | 2502         | 2669         | 2555         | 1875         | 1845         | 1795         | 1604         | 1641         | 1.0        | 0.8        | 0.6        | 0.5        |
| CRIM1        | 8485         | 8718         | 8547         | 6189         | 6471         | 6358         | 3805         | 3857         | 3911         | 3322         | 3410         | 1.0        | 0.7        | 0.4        | 0.4        |
| CTNNA1       | 27691        | 27572        | 26914        | 23005        | 23457        | 23283        | 17494        | 17697        | 17215        | 16263        | 15899        | 1.0        | 0.8        | 0.6        | 0.6        |
| EPAS1        | 36634        | 35446        | 37014        | 26947        | 28280        | 28119        | 15267        | 15569        | 15387        | 12675        | 13183        | 1.0        | 0.8        | 0.4        | 0.4        |
| ZYX          | 21657        | 21767        | 22474        | 16903        | 17057        | 17827        | 10462        | 10646        | 10510        | 9353         | 9020         | 1.0        | 0.8        | 0.5        | 0.4        |
| TP53I3       | 1425         | 1390         | 1315         | 1015         | 1014         | 1107         | 704          | 689          | 651          | 570          | 581          | 1.0        | 0.8        | 0.5        | 0.4        |
| FAM107B      | 1967         | 1917         | 1916         | 1520         | 1518         | 1493         | 1095         | 943          | 994          | 810          | 853          | 1.0        | 0.8        | 0.5        | 0.4        |
| DGKD         | 5986         | 5608         | 5865         | 4662         | 4479         | 4549         | 3166         | 2965         | 3020         | 2497         | 2655         | 1.0        | 0.8        | 0.5        | 0.4        |
| HIP1R        | 6410         | 6400         | 6715         | 5188         | 5068         | 5409         | 3761         | 3455         | 3659         | 3254         | 3007         | 1.0        | 0.8        | 0.6        | 0.5        |
| NEDD9        | 5566         | 5790         | 5620         | 4130         | 4092         | 4434         | 2862         | 2575         | 2781         | 2264         | 2171         | 1.0        | 0.7        | 0.5        | 0.4        |
| UACA         | 2985         | 3172         | 2948         | 2350         | 2460         | 2418         | 1741         | 1698         | 1770         | 1517         | 1616         | 1.0        | 0.8        | 0.6        | 0.5        |
| KLHL5        | 6841         | 6956         | 7003         | 5274         | 5426         | 5186         | 3951         | 3590         | 4052         | 3288         | 3330         | 1.0        | 0.8        | 0.6        | 0.5        |
| PDLIM5       | 7076         | 7167         | 7153         | 5558         | 5737         | 5906         | 4425         | 4065         | 4386         | 3550         | 3826         | 1.0        | 0.8        | 0.6        | 0.5        |
| CACNG6       | 555          | 604          | 571          | 441          | 348          | 347          | 149          | 100          | 96           | 78           | 86           | 1.0        | 0.7        | 0.2        | 0.1        |
| SLC25A30     | 1165         | 1215         | 1207         | 1076         | 1049         | 921          | 646          | 613          | 616          | 505          | 558          | 1.0        | 0.8        | 0.5        | 0.4        |
| CPA4         | 131          | 135          | 143          | 98           | 104          | 85           | 34           | 44           | 34           | 25           | 25           | 1.0        | 0.7        | 0.3        | 0.2        |
| WNT11        | 82           | 117          | 131          | 61           | 59           | 61           | 5            | 7            | 5            | 3            | 1            | 1.0        | 0.5        | 0.1        | 0.0        |
| ITGA3        | 13383        | 13226        | 14011        | 10435        | 10504        | 10892        | 5629         | 6066         | 5873         | 5315         | 5436         | 1.0        | 0.8        | 0.4        | 0.4        |
| RASD1        | 3921         | 4059         | 4089         | 1761         | 1692         | 1885         | 146          | 174          | 181          | 87           | 110          | 1.0        | 0.4        | 0.0        | 0.0        |
| FSCN1        | 4819         | 4846         | 5017         | 3945         | 3832         | 3793         | 1974         | 2058         | 2001         | 1898         | 1709         | 1.0        | 0.8        | 0.4        | 0.4        |
| ASAP2        | 9258         | 9147         | 9083         | 7356         | 7564         | 7189         | 4350         | 4402         | 4186         | 3978         | 4020         | 1.0        | 0.8        | 0.5        | 0.4        |
| RAB32        | 3780         | 3701         | 3704         | 2919         | 2864         | 2934         | 1489         | 1560         | 1428         | 1321         | 1358         | 1.0        | 0.8        | 0.4        | 0.4        |
| PTGER4       | 2204         | 2274         | 2181         | 1638         | 1563         | 1666         | 556          | 571          | 529          | 402          | 359          | 1.0        | 0.7        | 0.2        | 0.2        |
| CARD14       | 950          | 918          | 929          | 746          | 711          | 801          | 394          | 423          | 415          | 330          | 324          | 1.0        | 0.8        | 0.4        | 0.4        |
| TMEM184A     | 5702         | 5948         | 6141         | 4937         | 4612         | 4748         | 3023         | 3118         | 3011         | 2631         | 2720         | 1.0        | 0.8        | 0.5        | 0.5        |
| SYNPO        | 4767         | 4547         | 4869         | 3027         | 3014         | 2852         | 842          | 917          | 973          | 621          | 596          | 1.0        | 0.6        | 0.2        | 0.1        |
| PACS1        | 16139        | 15623        | 16907        | 14300        | 13859        | 13429        | 9375         | 8926         | 9232         | 7997         | 7928         | 1.0        | 0.9        | 0.6        | 0.5        |
| HDAC7        | 5858         | 5603         | 5586         | 4854         | 4757         | 4812         | 3167         | 3058         | 3090         | 2668         | 2736         | 1.0        | 0.8        | 0.5        | 0.5        |
| RND1         | 2307         | 2426         | 2416         | 1467         | 1423         | 1525         | 488          | 450          | 423          | 304          | 369          | 1.0        | 0.6        | 0.2        | 0.1        |
| PAWR         | 15922        | 16734        | 16144        | 12822        | 13442        | 13374        | 8123         | 7754         | 8183         | 6631         | 6935         | 1.0        | 0.8        | 0.5        | 0.4        |
| MKL1         | 3786         | 3623         | 3749         | 3267         | 3094         | 3093         | 2996         | 3033         | 2970         | 2728         | 2536         | 1.0        | 0.8        | 0.8        | 0.7        |
| CACNB3       | 3542         | 3610         | 3555         | 3037         | 2912         | 2906         | 2751         | 2695         | 2636         | 2495         | 2284         | 1.0        | 0.8        | 0.8        | 0.7        |
| TAF10        | 2792         | 2560         | 2643         | 2337         | 2188         | 2295         | 1985         | 2119         | 2041         | 1862         | 1812         | 1.0        | 0.9        | 0.8        | 0.7        |
| THEG         | 525          | 401          | 455          | 283          | 267          | 289          | 167          | 188          | 186          | 134          | 115          | 1.0        | 0.6        | 0.4        | 0.3        |
| C7orf26      | 1567         | 1609         | 1530         | 1304         | 1290         | 1370         | 1241         | 1261         | 1241         | 1187         | 1140         | 1.0        | 0.8        | 0.8        | 0.7        |
| GATA6        | 696          | 817          | 735          | 489          | 431          | 546          | 407          | 388          | 387          | 302          | 267          | 1.0        | 0.7        | 0.5        | 0.4        |
| RHOC         | 5960         | 5791         | 5959         | 5066         | 4859         | 4966         | 4424         | 4297         | 4209         | 4027         | 3825         | 1.0        | 0.8        | 0.7        | 0.7        |
| LMO7         | 6084         | 5773         | 5815         | 3850         | 3728         | 3676         | 2766         | 2569         | 2753         | 2245         | 2077         | 1.0        | 0.6        | 0.5        | 0.4        |
| ABLIM3       | 2426         | 2260         | 2295         | 2013         | 1933         | 1918         | 1650         | 1614         | 1624         | 1577         | 1479         | 1.0        | 0.8        | 0.7        | 0.7        |
| BAIAP2       | 2099         | 2005         | 2116         | 1704         | 1626         | 1604         | 1234         | 1230         | 1237         | 1180         | 1077         | 1.0        | 0.8        | 0.6        | 0.5        |
| SLC5A10      | 506          | 518          | 526          | 405          | 436          | 418          | 342          | 339          | 342          | 321          | 304          | 1.0        | 0.8        | 0.7        | 0.6        |
| USP2         | 481          | 484          | 528          | 289          | 295          | 306          | 153          | 152          | 177          | 133          | 120          | 1.0        | 0.6        | 0.3        | 0.3        |
| SH2D3A       | 1815         | 1959         | 1920         | 1329         | 1340         | 1382         | 915          | 913          | 979          | 802          | 738          | 1.0        | 0.7        | 0.5        | 0.4        |

|              |              |              |              |             |             |             |             |             |             |             |             |            |            |            |            |
|--------------|--------------|--------------|--------------|-------------|-------------|-------------|-------------|-------------|-------------|-------------|-------------|------------|------------|------------|------------|
| SLC12A2      | 5106         | 4955         | 5099         | 4103        | 4282        | 4110        | 3664        | 3757        | 3561        | 3204        | 3148        | 1.0        | 0.8        | 0.7        | 0.6        |
| RAB5B        | 1808         | 1701         | 1773         | 1455        | 1482        | 1484        | 1246        | 1273        | 1226        | 1058        | 1078        | 1.0        | 0.8        | 0.7        | 0.6        |
| DRD1         | 471          | 439          | 480          | 221         | 238         | 219         | 134         | 111         | 114         | 69          | 65          | 1.0        | 0.5        | 0.3        | 0.1        |
| CSNK1D       | 8370         | 8525         | 8617         | 7362        | 7131        | 7332        | 6353        | 6656        | 6194        | 5855        | 5616        | 1.0        | 0.9        | 0.8        | 0.7        |
| CAP1         | 10994        | 10447        | 10709        | 8898        | 9297        | 9128        | 7873        | 8241        | 7801        | 7336        | 7548        | 1.0        | 0.8        | 0.7        | 0.7        |
| ATP2B1       | 12504        | 11965        | 12214        | 10217       | 10147       | 10012       | 8873        | 8950        | 8706        | 8170        | 8449        | 1.0        | 0.8        | 0.7        | 0.7        |
| PRKAR1A      | 21750        | 21420        | 21077        | 18007       | 18462       | 18118       | 16358       | 16249       | 16177       | 15240       | 15413       | 1.0        | 0.8        | 0.8        | 0.7        |
| PPP2R5B      | 1188         | 1214         | 1110         | 934         | 887         | 874         | 711         | 789         | 661         | 598         | 649         | 1.0        | 0.8        | 0.6        | 0.5        |
| RAB11FIP4    | 2561         | 2574         | 2423         | 1977        | 1851        | 1936        | 1558        | 1587        | 1371        | 1237        | 1248        | 1.0        | 0.8        | 0.6        | 0.5        |
| ILK          | 2815         | 2931         | 3017         | 2548        | 2332        | 2338        | 2099        | 2084        | 1987        | 1820        | 1916        | 1.0        | 0.8        | 0.7        | 0.6        |
| PDGFA        | 1416         | 1357         | 1437         | 1139        | 1197        | 1099        | 1042        | 1128        | 1129        | 920         | 966         | 1.0        | 0.8        | 0.8        | 0.7        |
| CRISPLD2     | 542          | 545          | 592          | 376         | 395         | 370         | 312         | 393         | 356         | 250         | 276         | 1.0        | 0.7        | 0.6        | 0.5        |
| CDYL2        | 8781         | 8332         | 8721         | 6515        | 6710        | 6444        | 6204        | 6410        | 6235        | 5137        | 5440        | 1.0        | 0.8        | 0.7        | 0.6        |
| MAP7D1       | 3358         | 3602         | 3709         | 2926        | 2981        | 2880        | 2517        | 2702        | 2633        | 2455        | 2328        | 1.0        | 0.8        | 0.7        | 0.7        |
| UBTD1        | 931          | 1014         | 1071         | 805         | 849         | 735         | 658         | 731         | 667         | 609         | 603         | 1.0        | 0.8        | 0.7        | 0.6        |
| C1QL4        | 176          | 169          | 173          | 113         | 133         | 92          | 79          | 98          | 90          | 71          | 63          | 1.0        | 0.7        | 0.5        | 0.4        |
| POFUT2       | 2321         | 2246         | 2213         | 1891        | 1892        | 1786        | 1654        | 1785        | 1711        | 1633        | 1590        | 1.0        | 0.8        | 0.8        | 0.7        |
| EHBP1L1      | 3337         | 3247         | 3304         | 2374        | 2413        | 2419        | 2086        | 2117        | 2104        | 1787        | 1728        | 1.0        | 0.7        | 0.6        | 0.5        |
| KIAA0513     | 8002         | 7851         | 8042         | 4662        | 4695        | 4775        | 3883        | 3554        | 3838        | 2793        | 2588        | 1.0        | 0.6        | 0.5        | 0.3        |
| <b>ERBB2</b> | <b>10146</b> | <b>10314</b> | <b>10277</b> | <b>7876</b> | <b>7527</b> | <b>7676</b> | <b>6678</b> | <b>6665</b> | <b>6670</b> | <b>5913</b> | <b>5388</b> | <b>1.0</b> | <b>0.8</b> | <b>0.7</b> | <b>0.6</b> |
| WNT7B        | 4592         | 4557         | 4638         | 3474        | 3219        | 3283        | 2841        | 2894        | 2904        | 2399        | 2296        | 1.0        | 0.7        | 0.6        | 0.5        |
| NRBP1        | 10550        | 10245        | 10259        | 8824        | 8516        | 8776        | 8346        | 7918        | 8065        | 7476        | 7370        | 1.0        | 0.8        | 0.8        | 0.7        |
| AMOTL2       | 7570         | 7930         | 7997         | 6809        | 6547        | 6514        | 6174        | 5970        | 6054        | 5208        | 5359        | 1.0        | 0.8        | 0.8        | 0.7        |
| GRAMD1A      | 2997         | 3023         | 3007         | 2412        | 2359        | 2323        | 2283        | 2109        | 2100        | 1808        | 1796        | 1.0        | 0.8        | 0.7        | 0.6        |
| MISP         | 5270         | 5536         | 5266         | 4364        | 4410        | 4242        | 3922        | 3807        | 3762        | 3310        | 3284        | 1.0        | 0.8        | 0.7        | 0.6        |
| GPR39        | 3693         | 3679         | 3674         | 2884        | 2953        | 2947        | 2435        | 2345        | 2398        | 2055        | 2064        | 1.0        | 0.8        | 0.6        | 0.6        |
| TUFT1        | 7336         | 7260         | 7267         | 4790        | 5005        | 5130        | 3639        | 3448        | 3687        | 2631        | 2831        | 1.0        | 0.7        | 0.5        | 0.4        |
| SMAD3        | 20614        | 19810        | 20672        | 13745       | 14265       | 14810       | 10233       | 9867        | 10411       | 8490        | 8592        | 1.0        | 0.7        | 0.5        | 0.4        |
| LRP10        | 20123        | 19731        | 20915        | 16478       | 16094       | 16157       | 13894       | 14295       | 13985       | 12357       | 12625       | 1.0        | 0.8        | 0.7        | 0.6        |
| MBNL2        | 4006         | 4091         | 4300         | 3132        | 3264        | 3200        | 2904        | 2638        | 2675        | 2279        | 2361        | 1.0        | 0.8        | 0.7        | 0.6        |
| LYSMD3       | 1720         | 1793         | 1853         | 1236        | 1307        | 1255        | 1005        | 919         | 1058        | 754         | 761         | 1.0        | 0.7        | 0.6        | 0.4        |
| PMEPA1       | 79402        | 82529        | 81906        | 60283       | 60301       | 62170       | 52284       | 52685       | 52895       | 44169       | 44165       | 1.0        | 0.7        | 0.6        | 0.5        |
| THBS1        | 81468        | 82227        | 85346        | 56289       | 58377       | 58956       | 47258       | 45772       | 46944       | 38161       | 38351       | 1.0        | 0.7        | 0.6        | 0.5        |
| MYADM        | 10206        | 10293        | 11180        | 5315        | 5534        | 5945        | 3890        | 3792        | 3854        | 2751        | 2840        | 1.0        | 0.5        | 0.4        | 0.3        |
| CTGF         | 3058         | 3530         | 3441         | 1464        | 1462        | 1617        | 926         | 841         | 935         | 490         | 482         | 1.0        | 0.5        | 0.3        | 0.1        |
| SH3BP4       | 5927         | 6210         | 6186         | 4220        | 4115        | 4329        | 3580        | 3310        | 3493        | 2655        | 2726        | 1.0        | 0.7        | 0.6        | 0.4        |
| OPTN         | 3769         | 3796         | 3758         | 2890        | 2990        | 3019        | 2662        | 2478        | 2629        | 2241        | 2265        | 1.0        | 0.8        | 0.7        | 0.6        |
| RAB6B        | 1291         | 1226         | 1247         | 990         | 1078        | 1019        | 929         | 909         | 943         | 806         | 770         | 1.0        | 0.8        | 0.7        | 0.6        |
| UBL3         | 5753         | 5672         | 5732         | 4595        | 4823        | 4712        | 4350        | 4188        | 4289        | 3587        | 3887        | 1.0        | 0.8        | 0.7        | 0.7        |
| KAT2B        | 1408         | 1396         | 1360         | 986         | 1118        | 1051        | 975         | 880         | 904         | 710         | 767         | 1.0        | 0.8        | 0.7        | 0.5        |
| <b>ENC1</b>  | <b>4687</b>  | <b>4857</b>  | <b>4838</b>  | <b>2951</b> | <b>3331</b> | <b>3463</b> | <b>2433</b> | <b>2592</b> | <b>2449</b> | <b>1926</b> | <b>1982</b> | <b>1.0</b> | <b>0.7</b> | <b>0.5</b> | <b>0.4</b> |
| STK38L       | 5529         | 5867         | 5516         | 3743        | 4187        | 4409        | 3430        | 3458        | 3471        | 2744        | 2810        | 1.0        | 0.7        | 0.6        | 0.5        |
| SIM2         | 1814         | 1792         | 1822         | 981         | 1071        | 1126        | 792         | 774         | 821         | 522         | 561         | 1.0        | 0.6        | 0.4        | 0.3        |
| SIK1         | 5283         | 5238         | 5398         | 4093        | 4214        | 4334        | 3653        | 3711        | 3698        | 3017        | 3130        | 1.0        | 0.8        | 0.7        | 0.6        |
| GRAMD3       | 1602         | 1739         | 1679         | 1179        | 1366        | 1354        | 1135        | 1221        | 1094        | 1004        | 1004        | 1.0        | 0.8        | 0.7        | 0.6        |
| HES1         | 1472         | 1665         | 1601         | 1192        | 1178        | 1182        | 1031        | 1104        | 1066        | 827         | 910         | 1.0        | 0.7        | 0.7        | 0.6        |
| EVA1B        | 463          | 543          | 506          | 362         | 361         | 340         | 290         | 298         | 314         | 231         | 239         | 1.0        | 0.7        | 0.6        | 0.5        |
| DAPP1        | 148          | 161          | 143          | 63          | 94          | 67          | 52          | 54          | 62          | 34          | 44          | 1.0        | 0.5        | 0.4        | 0.3        |
| MYL12A       | 24401        | 24479        | 23478        | 18550       | 19538       | 19455       | 16729       | 17306       | 18180       | 15584       | 16171       | 1.0        | 0.8        | 0.7        | 0.7        |
| MFSB6        | 1595         | 1511         | 1515         | 1276        | 1176        | 1267        | 1171        | 1084        | 1161        | 919         | 1059        | 1.0        | 0.8        | 0.7        | 0.6        |
| OCLN         | 2126         | 2020         | 2006         | 1618        | 1617        | 1722        | 1509        | 1404        | 1552        | 1271        | 1296        | 1.0        | 0.8        | 0.7        | 0.6        |
| SLC26A11     | 1336         | 1290         | 1325         | 1042        | 985         | 1099        | 856         | 784         | 822         | 722         | 798         | 1.0        | 0.8        | 0.6        | 0.6        |
| VCL          | 7296         | 7032         | 7551         | 5869        | 5933        | 6186        | 5492        | 5106        | 5320        | 4848        | 4954        | 1.0        | 0.8        | 0.7        | 0.7        |
| KLHL25       | 1333         | 1229         | 1308         | 1084        | 1023        | 1079        | 963         | 886         | 900         | 813         | 833         | 1.0        | 0.8        | 0.7        | 0.6        |
| ARID3B       | 418          | 376          | 482          | 315         | 295         | 339         | 259         | 223         | 242         | 181         | 218         | 1.0        | 0.7        | 0.6        | 0.5        |
| DLL1         | 333          | 317          | 377          | 248         | 272         | 251         | 198         | 205         | 234         | 128         | 177         | 1.0        | 0.8        | 0.6        | 0.4        |
| WNT9A        | 211          | 209          | 276          | 150         | 150         | 192         | 127         | 131         | 136         | 85          | 108         | 1.0        | 0.7        | 0.6        | 0.4        |
| USB1         | 1516         | 1280         | 1431         | 1194        | 1208        | 1181        | 1054        | 1065        | 1090        | 1048        | 1073        | 1.0        | 0.8        | 0.8        | 0.8        |
| CTDSPL       | 441          | 409          | 423          | 361         | 356         | 344         | 342         | 302         | 340         | 321         | 308         | 1.0        | 0.8        | 0.8        | 0.7        |
| DHX15        | 10677        | 10261        | 10451        | 8918        | 8676        | 8764        | 8609        | 8002        | 8396        | 8256        | 7955        | 1.0        | 0.8        | 0.8        | 0.8        |
| KLC3         | 671          | 632          | 607          | 553         | 529         | 498         | 474         | 432         | 510         | 454         | 450         | 1.0        | 0.8        | 0.7        | 0.7        |
| SYDE2        | 1029         | 1017         | 1022         | 880         | 908         | 815         | 814         | 734         | 838         | 710         | 711         | 1.0        | 0.8        | 0.8        | 0.7        |
| TNFAIP1      | 4372         | 4268         | 4285         | 3480        | 3563        | 3391        | 3360        | 3009        | 3263        | 2875        | 2863        | 1.0        | 0.8        | 0.7        | 0.7        |
| INPP4A       | 2239         | 2208         | 2190         | 1951        | 1865        | 1828        | 1719        | 1517        | 1694        | 1479        | 1457        | 1.0        | 0.9        | 0.7        | 0.7        |
| CSF1         | 265          | 219          | 286          | 151         | 196         | 161         | 107         | 107         | 165         | 111         | 132         | 1.0        | 0.7        | 0.5        | 0.5        |
| MN1          | 148          | 158          | 165          | 125         | 99          | 108         | 46          | 61          | 78          | 49          | 60          | 1.0        | 0.7        | 0.4        | 0.3        |

|              |             |             |             |             |             |             |             |             |             |             |             |            |            |            |            |
|--------------|-------------|-------------|-------------|-------------|-------------|-------------|-------------|-------------|-------------|-------------|-------------|------------|------------|------------|------------|
| PPAP2B       | 412         | 444         | 412         | 367         | 360         | 323         | 230         | 261         | 289         | 271         | 245         | 1.0        | 0.8        | 0.6        | 0.6        |
| CMIP         | 3602        | 3482        | 3860        | 3090        | 3052        | 3061        | 2726        | 2785        | 2901        | 2675        | 2751        | 1.0        | 0.8        | 0.8        | 0.7        |
| PNPLA6       | 1271        | 1317        | 1480        | 1117        | 1088        | 1083        | 912         | 962         | 956         | 959         | 935         | 1.0        | 0.8        | 0.7        | 0.7        |
| P2RY6        | 42          | 40          | 69          | 20          | 31          | 25          | 7           | 6           | 15          | 6           | 6           | 1.0        | 0.5        | 0.2        | 0.1        |
| AP5B1        | 471         | 448         | 558         | 402         | 395         | 405         | 320         | 301         | 360         | 323         | 296         | 1.0        | 0.8        | 0.7        | 0.6        |
| FAM228B      | 262         | 269         | 259         | 231         | 210         | 183         | 147         | 140         | 159         | 135         | 144         | 1.0        | 0.8        | 0.6        | 0.5        |
| PPFIA1       | 5989        | 6256        | 6171        | 5292        | 5208        | 5135        | 4659        | 4500        | 4674        | 4171        | 4350        | 1.0        | 0.8        | 0.8        | 0.7        |
| UTRN         | 1751        | 1754        | 1802        | 1303        | 1407        | 1222        | 992         | 954         | 1071        | 787         | 938         | 1.0        | 0.7        | 0.6        | 0.5        |
| MAPK8IP2     | 269         | 234         | 246         | 182         | 198         | 162         | 104         | 96          | 116         | 98          | 84          | 1.0        | 0.7        | 0.4        | 0.4        |
| <b>KRT7</b>  | <b>1840</b> | <b>1732</b> | <b>1603</b> | <b>1248</b> | <b>1335</b> | <b>1213</b> | <b>894</b>  | <b>930</b>  | <b>1038</b> | <b>835</b>  | <b>839</b>  | <b>1.0</b> | <b>0.7</b> | <b>0.6</b> | <b>0.5</b> |
| F3           | 475         | 374         | 449         | 249         | 273         | 303         | 163         | 147         | 173         | 154         | 154         | 1.0        | 0.6        | 0.4        | 0.4        |
| FHDC1        | 1465        | 1331        | 1443        | 1207        | 1165        | 1186        | 1015        | 982         | 979         | 973         | 999         | 1.0        | 0.8        | 0.7        | 0.7        |
| HES2         | 215         | 225         | 221         | 140         | 140         | 147         | 68          | 65          | 86          | 76          | 82          | 1.0        | 0.6        | 0.3        | 0.4        |
| PYCARD       | 1866        | 1876        | 1866        | 1586        | 1494        | 1557        | 1072        | 1176        | 1202        | 1141        | 1155        | 1.0        | 0.8        | 0.6        | 0.6        |
| MALL         | 6380        | 5963        | 6409        | 4334        | 4526        | 4446        | 3354        | 3391        | 3578        | 3333        | 3215        | 1.0        | 0.7        | 0.6        | 0.5        |
| ZC3H7B       | 7526        | 7508        | 7888        | 6015        | 6230        | 6059        | 4791        | 4799        | 5060        | 4991        | 4832        | 1.0        | 0.8        | 0.6        | 0.6        |
| SHC1         | 5159        | 5041        | 5151        | 4120        | 4109        | 4247        | 3338        | 3493        | 3652        | 3442        | 3240        | 1.0        | 0.8        | 0.7        | 0.7        |
| RAB11FIP1    | 3653        | 3502        | 3515        | 2829        | 2920        | 2818        | 2312        | 2454        | 2486        | 2316        | 2472        | 1.0        | 0.8        | 0.7        | 0.7        |
| STAT3        | 7127        | 7119        | 7283        | 5886        | 6100        | 6052        | 4909        | 4829        | 4786        | 4689        | 4611        | 1.0        | 0.8        | 0.7        | 0.6        |
| IL4R         | 4693        | 4618        | 4816        | 3545        | 3611        | 3650        | 2676        | 2596        | 2673        | 2529        | 2505        | 1.0        | 0.8        | 0.6        | 0.5        |
| SLC4A7       | 4958        | 4870        | 4943        | 3617        | 3900        | 3807        | 2762        | 2764        | 2840        | 2615        | 2595        | 1.0        | 0.8        | 0.6        | 0.5        |
| PTRF         | 5155        | 5247        | 5201        | 3386        | 3547        | 3720        | 2199        | 2117        | 2178        | 1901        | 1983        | 1.0        | 0.7        | 0.4        | 0.4        |
| TSPAN14      | 5158        | 5199        | 5265        | 4204        | 4208        | 4303        | 3507        | 3348        | 3417        | 3270        | 3205        | 1.0        | 0.8        | 0.7        | 0.6        |
| ELMSAN1      | 5568        | 5509        | 5871        | 4549        | 4599        | 4778        | 3697        | 3647        | 3858        | 3557        | 3553        | 1.0        | 0.8        | 0.7        | 0.6        |
| TMEM8A       | 7443        | 7388        | 7611        | 6057        | 5848        | 6120        | 4457        | 4657        | 4690        | 4480        | 4293        | 1.0        | 0.8        | 0.6        | 0.6        |
| FURIN        | 9184        | 9009        | 9647        | 7163        | 6812        | 7082        | 4993        | 5249        | 4820        | 4713        | 4766        | 1.0        | 0.8        | 0.5        | 0.5        |
| BACE2        | 1280        | 1188        | 1329        | 951         | 972         | 979         | 666         | 671         | 675         | 686         | 662         | 1.0        | 0.8        | 0.5        | 0.5        |
| RNF121       | 3118        | 2846        | 2981        | 2312        | 2464        | 2332        | 1762        | 1753        | 1818        | 1614        | 1611        | 1.0        | 0.8        | 0.6        | 0.5        |
| MAP3K9       | 3585        | 3368        | 3556        | 2865        | 2948        | 2803        | 2223        | 2262        | 2304        | 2052        | 2082        | 1.0        | 0.8        | 0.6        | 0.6        |
| LYPD1        | 4208        | 4121        | 4365        | 3287        | 3589        | 3451        | 2533        | 2701        | 2620        | 2358        | 2381        | 1.0        | 0.8        | 0.6        | 0.6        |
| PXN-AS1      | 8645        | 8693        | 8449        | 6316        | 6826        | 6469        | 4505        | 4743        | 4681        | 4201        | 4084        | 1.0        | 0.8        | 0.5        | 0.5        |
| ITGAV        | 39597       | 39494       | 40006       | 27234       | 29341       | 27604       | 18780       | 18475       | 18779       | 15476       | 16392       | 1.0        | 0.7        | 0.5        | 0.4        |
| ITGB1        | 55979       | 54535       | 54674       | 45934       | 47797       | 47011       | 38561       | 39152       | 38061       | 37737       | 38505       | 1.0        | 0.9        | 0.7        | 0.7        |
| VMP1         | 23733       | 22666       | 23141       | 18851       | 19674       | 19780       | 15696       | 15237       | 15352       | 14183       | 14906       | 1.0        | 0.8        | 0.7        | 0.6        |
| DAPK3        | 4295        | 4692        | 4544        | 3527        | 3590        | 3770        | 2405        | 2449        | 2385        | 2228        | 2096        | 1.0        | 0.8        | 0.5        | 0.5        |
| FRMD6        | 8381        | 8880        | 8832        | 5639        | 6141        | 6522        | 2925        | 3001        | 2744        | 2537        | 2647        | 1.0        | 0.7        | 0.3        | 0.3        |
| NFKB2        | 6810        | 6931        | 7308        | 5106        | 5332        | 5380        | 3439        | 3090        | 3283        | 3065        | 2991        | 1.0        | 0.8        | 0.5        | 0.4        |
| <b>DUSP1</b> | <b>1430</b> | <b>1475</b> | <b>1445</b> | <b>932</b>  | <b>939</b>  | <b>976</b>  | <b>467</b>  | <b>409</b>  | <b>411</b>  | <b>381</b>  | <b>385</b>  | <b>1.0</b> | <b>0.7</b> | <b>0.3</b> | <b>0.3</b> |
| PFDN1        | 2465        | 2647        | 2667        | 2095        | 2190        | 2276        | 1788        | 1753        | 1658        | 1655        | 1622        | 1.0        | 0.8        | 0.7        | 0.6        |
| PLCB1        | 1401        | 1550        | 1482        | 1202        | 1214        | 1224        | 976         | 920         | 943         | 934         | 977         | 1.0        | 0.8        | 0.6        | 0.6        |
| ZNF281       | 2855        | 2923        | 2897        | 2280        | 2402        | 2409        | 1821        | 1739        | 1743        | 1647        | 1881        | 1.0        | 0.8        | 0.6        | 0.6        |
| TMPRSS2      | 233         | 232         | 228         | 137         | 134         | 156         | 79          | 87          | 69          | 65          | 84          | 1.0        | 0.6        | 0.3        | 0.3        |
| F2RL1        | 1068        | 1037        | 1071        | 590         | 598         | 621         | 362         | 392         | 320         | 283         | 332         | 1.0        | 0.6        | 0.3        | 0.3        |
| EFHD2        | 2983        | 2899        | 3083        | 2406        | 2502        | 2529        | 2037        | 2084        | 1926        | 1958        | 2060        | 1.0        | 0.8        | 0.7        | 0.7        |
| B3GNT5       | 177         | 185         | 207         | 110         | 114         | 147         | 78          | 65          | 84          | 62          | 83          | 1.0        | 0.7        | 0.4        | 0.4        |
| NFKBIE       | 758         | 817         | 907         | 546         | 623         | 697         | 484         | 431         | 430         | 387         | 434         | 1.0        | 0.8        | 0.5        | 0.5        |
| S100A3       | 58          | 38          | 61          | 19          | 30          | 36          | 13          | 8           | 5           | 8           | 9           | 1.0        | 0.5        | 0.2        | 0.2        |
| RUFY3        | 569         | 571         | 557         | 463         | 411         | 493         | 356         | 407         | 366         | 349         | 405         | 1.0        | 0.8        | 0.7        | 0.7        |
| CDC42EP1     | 637         | 750         | 735         | 509         | 576         | 630         | 469         | 407         | 416         | 490         | 401         | 1.0        | 0.8        | 0.6        | 0.6        |
| SLC9A5       | 364         | 363         | 312         | 252         | 246         | 312         | 225         | 221         | 215         | 235         | 198         | 1.0        | 0.8        | 0.6        | 0.6        |
| KDM6B        | 3245        | 3224        | 3756        | 2334        | 2436        | 2572        | 1871        | 1833        | 1831        | 1666        | 1623        | 1.0        | 0.7        | 0.5        | 0.5        |
| SESN2        | 1049        | 1072        | 1165        | 808         | 823         | 881         | 724         | 709         | 641         | 633         | 626         | 1.0        | 0.8        | 0.6        | 0.6        |
| PDLIM2       | 465         | 483         | 517         | 395         | 397         | 413         | 366         | 373         | 361         | 356         | 343         | 1.0        | 0.8        | 0.8        | 0.7        |
| NCOA7        | 975         | 989         | 1040        | 693         | 740         | 840         | 644         | 630         | 646         | 637         | 560         | 1.0        | 0.8        | 0.6        | 0.6        |
| PLEKHG2      | 2784        | 2745        | 2841        | 2052        | 2130        | 2191        | 1886        | 1778        | 1703        | 1795        | 1679        | 1.0        | 0.8        | 0.6        | 0.6        |
| MAP2K3       | 3545        | 3586        | 3752        | 2917        | 3084        | 3013        | 2725        | 2707        | 2826        | 2574        | 2501        | 1.0        | 0.8        | 0.8        | 0.7        |
| BCAR1        | 9246        | 9469        | 9789        | 6993        | 6973        | 7126        | 5934        | 6387        | 6212        | 5618        | 5478        | 1.0        | 0.7        | 0.7        | 0.6        |
| KRT86        | 6029        | 5875        | 6129        | 3895        | 4032        | 4089        | 2903        | 3267        | 3467        | 2765        | 2674        | 1.0        | 0.7        | 0.5        | 0.5        |
| SH3GL1       | 4976        | 5043        | 4974        | 4077        | 3966        | 4188        | 3518        | 3517        | 3656        | 3257        | 3238        | 1.0        | 0.8        | 0.7        | 0.6        |
| LITAF        | 5953        | 5886        | 5945        | 4440        | 4422        | 4527        | 3736        | 3747        | 3795        | 3388        | 3375        | 1.0        | 0.8        | 0.6        | 0.6        |
| RHOV         | 1125        | 1257        | 1251        | 767         | 779         | 875         | 582         | 597         | 633         | 551         | 542         | 1.0        | 0.7        | 0.5        | 0.5        |
| IFNGR1       | 1728        | 1768        | 1711        | 1320        | 1378        | 1343        | 1126        | 1093        | 1104        | 1036        | 1070        | 1.0        | 0.8        | 0.6        | 0.6        |
| SDC4         | 7703        | 7803        | 7933        | 5996        | 6174        | 6355        | 5089        | 5051        | 5074        | 4878        | 4977        | 1.0        | 0.8        | 0.6        | 0.6        |
| SEMA7A       | 2290        | 2395        | 2529        | 1231        | 1350        | 1342        | 931         | 847         | 872         | 744         | 723         | 1.0        | 0.5        | 0.4        | 0.3        |
| <b>BAK1</b>  | <b>3089</b> | <b>3162</b> | <b>3172</b> | <b>2188</b> | <b>2233</b> | <b>2297</b> | <b>1933</b> | <b>1816</b> | <b>1763</b> | <b>1578</b> | <b>1542</b> | <b>1.0</b> | <b>0.7</b> | <b>0.6</b> | <b>0.5</b> |
| GLIS2        | 2196        | 2233        | 2213        | 1633        | 1633        | 1664        | 1436        | 1347        | 1379        | 1208        | 1185        | 1.0        | 0.7        | 0.6        | 0.5        |

|                 |             |             |             |             |             |             |             |             |             |             |             |            |            |            |            |
|-----------------|-------------|-------------|-------------|-------------|-------------|-------------|-------------|-------------|-------------|-------------|-------------|------------|------------|------------|------------|
| JUN             | 4524        | 5145        | 5186        | 4134        | 3832        | 4194        | 3289        | 3556        | 3319        | 3111        | 3234        | 1.0        | 0.8        | 0.7        | 0.6        |
| MAFK            | 1787        | 2129        | 2109        | 1660        | 1479        | 1582        | 1121        | 1272        | 1184        | 1163        | 1133        | 1.0        | 0.8        | 0.6        | 0.6        |
| MAFG            | 1373        | 1559        | 1472        | 1214        | 1113        | 1186        | 893         | 1024        | 1024        | 903         | 874         | 1.0        | 0.8        | 0.7        | 0.6        |
| PRKCZ           | 1651        | 1711        | 1680        | 1453        | 1390        | 1421        | 1200        | 1329        | 1309        | 1195        | 1146        | 1.0        | 0.8        | 0.8        | 0.7        |
| NEDD4L          | 1506        | 1556        | 1460        | 1185        | 1099        | 1145        | 893         | 937         | 1032        | 904         | 891         | 1.0        | 0.8        | 0.6        | 0.6        |
| SERTAD1         | 1365        | 1555        | 1465        | 938         | 1077        | 1034        | 851         | 932         | 873         | 899         | 862         | 1.0        | 0.7        | 0.6        | 0.6        |
| TNFRSF12A       | 9252        | 10127       | 9536        | 7062        | 7393        | 7376        | 6020        | 6641        | 6235        | 6184        | 5650        | 1.0        | 0.8        | 0.7        | 0.6        |
| RAB22A          | 5304        | 5588        | 5506        | 4405        | 4666        | 4649        | 4293        | 4291        | 4351        | 4058        | 4177        | 1.0        | 0.8        | 0.8        | 0.8        |
| SOWAHC          | 1204        | 1318        | 1276        | 767         | 820         | 817         | 643         | 626         | 664         | 588         | 618         | 1.0        | 0.6        | 0.5        | 0.5        |
| VEGFC           | 279         | 286         | 289         | 222         | 234         | 213         | 196         | 195         | 175         | 185         | 195         | 1.0        | 0.8        | 0.7        | 0.7        |
| FAM83G          | 2953        | 3253        | 3152        | 2410        | 2685        | 2484        | 2100        | 2161        | 1913        | 1999        | 1974        | 1.0        | 0.8        | 0.7        | 0.6        |
| TUBB3           | 729         | 792         | 806         | 588         | 663         | 651         | 524         | 608         | 509         | 583         | 545         | 1.0        | 0.8        | 0.7        | 0.7        |
| MSX1            | 348         | 371         | 392         | 248         | 290         | 274         | 156         | 212         | 220         | 226         | 179         | 1.0        | 0.7        | 0.5        | 0.5        |
| EGFR-AS1        | 91          | 89          | 106         | 59          | 77          | 60          | 37          | 39          | 41          | 39          | 33          | 1.0        | 0.7        | 0.4        | 0.4        |
| NES             | 320         | 312         | 347         | 170         | 212         | 204         | 112         | 105         | 94          | 135         | 92          | 1.0        | 0.6        | 0.3        | 0.3        |
| MAPRE3          | 1279        | 1236        | 1350        | 968         | 1027        | 1019        | 774         | 850         | 732         | 822         | 749         | 1.0        | 0.8        | 0.6        | 0.6        |
| NFE2L3          | 1576        | 1546        | 1638        | 1256        | 1349        | 1309        | 1089        | 1005        | 1162        | 1245        | 1231        | 1.0        | 0.8        | 0.7        | 0.8        |
| CHST3           | 306         | 287         | 307         | 236         | 256         | 244         | 188         | 138         | 171         | 204         | 171         | 1.0        | 0.8        | 0.6        | 0.6        |
| AFAP1-AS1       | 326         | 323         | 333         | 227         | 261         | 256         | 226         | 186         | 170         | 223         | 231         | 1.0        | 0.8        | 0.6        | 0.7        |
| STRA6           | 48          | 40          | 57          | 25          | 33          | 13          | 4           | 6           | 3           | 1           | 6           | 1.0        | 0.5        | 0.1        | 0.1        |
| ZSWIM3          | 238         | 221         | 250         | 201         | 194         | 151         | 121         | 115         | 91          | 89          | 99          | 1.0        | 0.8        | 0.5        | 0.4        |
| B4GALNT3        | 61          | 86          | 77          | 39          | 58          | 38          | 22          | 11          | 17          | 12          | 26          | 1.0        | 0.6        | 0.2        | 0.3        |
| CCRN4L          | 531         | 487         | 563         | 479         | 442         | 407         | 340         | 270         | 316         | 279         | 339         | 1.0        | 0.8        | 0.6        | 0.6        |
| PRKD1           | 577         | 546         | 567         | 490         | 481         | 434         | 285         | 292         | 261         | 287         | 237         | 1.0        | 0.8        | 0.5        | 0.5        |
| HMGA2           | 176         | 155         | 163         | 98          | 119         | 92          | 28          | 24          | 17          | 26          | 15          | 1.0        | 0.6        | 0.1        | 0.1        |
| SCUBE3          | 864         | 773         | 862         | 408         | 460         | 410         | 48          | 52          | 42          | 64          | 32          | 1.0        | 0.5        | 0.1        | 0.1        |
| COL6A2          | 589         | 611         | 642         | 481         | 543         | 468         | 150         | 138         | 129         | 125         | 88          | 1.0        | 0.8        | 0.2        | 0.2        |
| CAMK1D          | 2857        | 2954        | 2899        | 2359        | 2581        | 2421        | 1349        | 1271        | 1279        | 1067        | 977         | 1.0        | 0.8        | 0.4        | 0.4        |
| TFPI            | 939         | 1046        | 869         | 628         | 727         | 613         | 231         | 259         | 229         | 219         | 165         | 1.0        | 0.7        | 0.3        | 0.2        |
| IFI6            | 887         | 1147        | 1059        | 682         | 824         | 765         | 217         | 162         | 139         | 192         | 114         | 1.0        | 0.7        | 0.2        | 0.1        |
| IL32            | 476         | 575         | 573         | 341         | 367         | 350         | 144         | 101         | 131         | 107         | 91          | 1.0        | 0.7        | 0.2        | 0.2        |
| FMNL2           | 1117        | 1277        | 1272        | 961         | 1129        | 992         | 651         | 555         | 582         | 613         | 582         | 1.0        | 0.8        | 0.5        | 0.5        |
| FSCN2           | 228         | 275         | 267         | 217         | 203         | 172         | 84          | 93          | 51          | 77          | 73          | 1.0        | 0.8        | 0.3        | 0.3        |
| SEMA5B          | 453         | 443         | 480         | 352         | 331         | 317         | 63          | 68          | 35          | 44          | 46          | 1.0        | 0.7        | 0.1        | 0.1        |
| CACNG8          | 612         | 586         | 580         | 388         | 457         | 393         | 86          | 86          | 54          | 62          | 102         | 1.0        | 0.7        | 0.1        | 0.1        |
| NF2             | 7348        | 7630        | 7699        | 6183        | 6393        | 6584        | 3790        | 3960        | 3621        | 3718        | 3720        | 1.0        | 0.8        | 0.5        | 0.5        |
| SPOCD1          | 542         | 490         | 547         | 307         | 387         | 397         | 80          | 81          | 70          | 84          | 80          | 1.0        | 0.7        | 0.1        | 0.2        |
| EFR3B           | 694         | 648         | 735         | 554         | 608         | 523         | 198         | 196         | 177         | 185         | 180         | 1.0        | 0.8        | 0.3        | 0.3        |
| NPNT            | 11961       | 11595       | 11721       | 9955        | 9739        | 9429        | 3735        | 3544        | 3589        | 3509        | 3555        | 1.0        | 0.8        | 0.3        | 0.3        |
| MRC2            | 9963        | 10121       | 10337       | 8119        | 7957        | 7901        | 2163        | 2181        | 2096        | 2015        | 1956        | 1.0        | 0.8        | 0.2        | 0.2        |
| PREX1           | 22557       | 21999       | 22562       | 19198       | 18029       | 18646       | 7867        | 7822        | 7649        | 7192        | 7183        | 1.0        | 0.8        | 0.3        | 0.3        |
| STMN3           | 2426        | 2504        | 2551        | 2148        | 2022        | 2081        | 1104        | 1078        | 1054        | 1057        | 1024        | 1.0        | 0.8        | 0.4        | 0.4        |
| FSTL3           | 4573        | 4426        | 4469        | 3497        | 3679        | 3711        | 1764        | 1549        | 1659        | 1740        | 1560        | 1.0        | 0.8        | 0.4        | 0.4        |
| AQP1            | 723         | 676         | 679         | 283         | 289         | 299         | 26          | 17          | 19          | 16          | 18          | 1.0        | 0.4        | 0.0        | 0.0        |
| Mar-01          | 2166        | 2162        | 2146        | 1783        | 1878        | 1787        | 1200        | 1083        | 1142        | 1101        | 1103        | 1.0        | 0.8        | 0.5        | 0.5        |
| IRX2            | 1871        | 2001        | 1986        | 1692        | 1643        | 1620        | 1284        | 1287        | 1192        | 1376        | 1231        | 1.0        | 0.8        | 0.6        | 0.7        |
| ADAM19          | 354         | 385         | 412         | 321         | 251         | 282         | 158         | 159         | 157         | 167         | 134         | 1.0        | 0.7        | 0.4        | 0.4        |
| PEAR1           | 46          | 54          | 63          | 27          | 38          | 33          | 4           | 8           | 4           | 5           | 6           | 1.0        | 0.6        | 0.1        | 0.1        |
| IL11            | 104         | 169         | 144         | 81          | 75          | 84          | 12          | 19          | 15          | 20          | 24          | 1.0        | 0.6        | 0.1        | 0.2        |
| ESPN            | 247         | 317         | 319         | 238         | 199         | 257         | 95          | 123         | 112         | 110         | 95          | 1.0        | 0.8        | 0.4        | 0.3        |
| GADD45A         | 828         | 928         | 918         | 690         | 661         | 763         | 362         | 421         | 349         | 371         | 354         | 1.0        | 0.8        | 0.4        | 0.4        |
| CCL22           | 66          | 61          | 94          | 34          | 32          | 34          | 4           | 2           | 5           | 2           | 7           | 1.0        | 0.5        | 0.0        | 0.1        |
| ERN1            | 1462        | 1379        | 1483        | 1152        | 1243        | 1281        | 784         | 772         | 820         | 844         | 824         | 1.0        | 0.8        | 0.5        | 0.6        |
| ADARB2          | 43          | 41          | 46          | 19          | 26          | 29          | 2           | 2           | 1           | 3           | 3           | 1.0        | 0.6        | 0.0        | 0.1        |
| IL7R            | 82          | 68          | 69          | 35          | 31          | 37          | 1           | 3           | 3           | 3           | 2           | 1.0        | 0.5        | 0.0        | 0.0        |
| SYT12           | 19684       | 19530       | 19897       | 14718       | 15351       | 14947       | 8359        | 8686        | 8529        | 8856        | 8782        | 1.0        | 0.8        | 0.4        | 0.4        |
| LAMC2           | 10401       | 9633        | 10476       | 6780        | 7368        | 6925        | 3639        | 3792        | 3675        | 3699        | 3940        | 1.0        | 0.7        | 0.4        | 0.4        |
| FLT1            | 109         | 103         | 101         | 59          | 56          | 55          | 13          | 14          | 9           | 16          | 15          | 1.0        | 0.5        | 0.1        | 0.1        |
| AKAP12          | 573         | 555         | 646         | 267         | 281         | 297         | 49          | 46          | 27          | 41          | 50          | 1.0        | 0.5        | 0.1        | 0.1        |
| TANC1           | 2049        | 2110        | 2126        | 1743        | 1633        | 1671        | 1152        | 1141        | 1104        | 1107        | 1144        | 1.0        | 0.8        | 0.5        | 0.5        |
| FHOD1           | 2131        | 2095        | 2242        | 1802        | 1812        | 1897        | 1417        | 1431        | 1342        | 1432        | 1439        | 1.0        | 0.9        | 0.6        | 0.7        |
| <b>KIAA0922</b> | <b>2096</b> | <b>2114</b> | <b>2185</b> | <b>1793</b> | <b>1719</b> | <b>1905</b> | <b>1353</b> | <b>1308</b> | <b>1263</b> | <b>1397</b> | <b>1367</b> | <b>1.0</b> | <b>0.8</b> | <b>0.6</b> | <b>0.6</b> |
| UNC5A           | 1540        | 1553        | 1673        | 1413        | 1181        | 1306        | 622         | 589         | 591         | 674         | 567         | 1.0        | 0.8        | 0.4        | 0.4        |
| MIR24-2         | 313         | 349         | 367         | 281         | 269         | 286         | 121         | 117         | 115         | 135         | 104         | 1.0        | 0.8        | 0.3        | 0.3        |
| KALRN           | 3036        | 2940        | 2950        | 2355        | 2389        | 2279        | 194         | 182         | 200         | 177         | 173         | 1.0        | 0.8        | 0.1        | 0.1        |
| PCDH7           | 960         | 1067        | 1021        | 770         | 753         | 732         | 3           | 4           | 1           | 4           | 2           | 1.0        | 0.7        | 0.0        | 0.0        |

|              |            |            |            |            |            |            |            |            |            |            |            |            |            |            |            |
|--------------|------------|------------|------------|------------|------------|------------|------------|------------|------------|------------|------------|------------|------------|------------|------------|
| TMEM40       | 177        | 160        | 179        | 127        | 136        | 126        | 20         | 12         | 14         | 23         | 14         | 1.0        | 0.8        | 0.1        | 0.1        |
| TP63         | 328        | 285        | 291        | 193        | 181        | 185        | 7          | 14         | 10         | 14         | 15         | 1.0        | 0.6        | 0.0        | 0.0        |
| TIMP3        | 842        | 842        | 875        | 717        | 674        | 764        | 290        | 294        | 289        | 331        | 345        | 1.0        | 0.8        | 0.3        | 0.4        |
| VAV1         | 203        | 193        | 192        | 156        | 168        | 128        | 16         | 16         | 26         | 38         | 17         | 1.0        | 0.8        | 0.1        | 0.1        |
| VTN          | 250        | 250        | 259        | 202        | 190        | 181        | 13         | 14         | 21         | 24         | 14         | 1.0        | 0.8        | 0.1        | 0.1        |
| PRKCG        | 298        | 303        | 308        | 222        | 204        | 193        | 5          | 13         | 10         | 23         | 8          | 1.0        | 0.7        | 0.0        | 0.1        |
| LRRC8C       | 723        | 788        | 790        | 560        | 694        | 558        | 238        | 226        | 222        | 311        | 294        | 1.0        | 0.8        | 0.3        | 0.4        |
| NTNG1        | 197        | 169        | 195        | 118        | 150        | 134        | 27         | 17         | 16         | 36         | 37         | 1.0        | 0.7        | 0.1        | 0.2        |
| TGM2         | 3381       | 3100       | 3480       | 2736       | 2828       | 2846       | 1241       | 1123       | 1099       | 1622       | 1505       | 1.0        | 0.8        | 0.3        | 0.5        |
| SH3TC1       | 50         | 59         | 37         | 26         | 30         | 20         | 4          | 1          | 2          | 2          | 2          | 1.0        | 0.5        | 0.0        | 0.0        |
| ANKLE2       | 6875       | 7109       | 7692       | 5856       | 5942       | 6030       | 3625       | 3461       | 3406       | 3167       | 3364       | 1.0        | 0.8        | 0.5        | 0.5        |
| CLDN1        | 12936      | 12777      | 13621      | 9699       | 10451      | 10375      | 4436       | 4152       | 4228       | 3624       | 3789       | 1.0        | 0.8        | 0.3        | 0.3        |
| UNC13D       | 5897       | 5736       | 5890       | 4539       | 4474       | 4345       | 2208       | 2118       | 2122       | 1892       | 1968       | 1.0        | 0.8        | 0.4        | 0.3        |
| EPHB6        | 2046       | 1951       | 2113       | 1326       | 1341       | 1282       | 478        | 435        | 464        | 380        | 380        | 1.0        | 0.6        | 0.2        | 0.2        |
| DIP2B        | 7157       | 6865       | 7349       | 5549       | 5808       | 5928       | 3190       | 3168       | 3327       | 2818       | 3157       | 1.0        | 0.8        | 0.5        | 0.4        |
| CSRNP2       | 3049       | 2848       | 3102       | 2237       | 2379       | 2390       | 1356       | 1317       | 1336       | 1214       | 1270       | 1.0        | 0.8        | 0.4        | 0.4        |
| PALLD        | 20008      | 19894      | 20368      | 15280      | 16062      | 16146      | 9245       | 8672       | 9254       | 7959       | 8000       | 1.0        | 0.8        | 0.5        | 0.4        |
| RIPK4        | 1514       | 1455       | 1626       | 1022       | 1102       | 1181       | 433        | 436        | 488        | 381        | 368        | 1.0        | 0.7        | 0.3        | 0.2        |
| SGMS2        | 1998       | 2017       | 2051       | 1630       | 1700       | 1570       | 1079       | 1006       | 1101       | 912        | 1026       | 1.0        | 0.8        | 0.5        | 0.5        |
| TSHZ3        | 205        | 222        | 213        | 163        | 152        | 180        | 60         | 52         | 68         | 46         | 61         | 1.0        | 0.8        | 0.3        | 0.3        |
| LAMC1        | 11185      | 10928      | 11194      | 9256       | 9438       | 9494       | 6500       | 6498       | 6460       | 6147       | 6701       | 1.0        | 0.8        | 0.6        | 0.6        |
| TLE2         | 2168       | 2052       | 2050       | 1671       | 1642       | 1729       | 971        | 1010       | 970        | 871        | 962        | 1.0        | 0.8        | 0.5        | 0.4        |
| KRT20        | 1119       | 1020       | 1075       | 826        | 796        | 773        | 244        | 245        | 237        | 210        | 251        | 1.0        | 0.7        | 0.2        | 0.2        |
| MAP1B        | 1821       | 1813       | 1804       | 1263       | 1456       | 1381       | 419        | 412        | 393        | 348        | 451        | 1.0        | 0.8        | 0.2        | 0.2        |
| ZNF91        | 399        | 445        | 416        | 305        | 316        | 326        | 168        | 153        | 160        | 180        | 146        | 1.0        | 0.8        | 0.4        | 0.4        |
| TRIM47       | 1312       | 1356       | 1337       | 872        | 890        | 1032       | 286        | 294        | 363        | 332        | 253        | 1.0        | 0.7        | 0.2        | 0.2        |
| ZSWIM6       | 1208       | 1307       | 1318       | 995        | 1005       | 1052       | 505        | 502        | 544        | 520        | 521        | 1.0        | 0.8        | 0.4        | 0.4        |
| TUBB2A       | 2731       | 2622       | 2772       | 2308       | 2266       | 2282       | 1565       | 1586       | 1637       | 1578       | 1418       | 1.0        | 0.8        | 0.6        | 0.6        |
| SEC14L1      | 8764       | 8739       | 8985       | 6746       | 6755       | 6898       | 4267       | 4357       | 4307       | 4188       | 4119       | 1.0        | 0.8        | 0.5        | 0.5        |
| PALM         | 1789       | 1781       | 1690       | 1376       | 1388       | 1395       | 932        | 915        | 930        | 943        | 884        | 1.0        | 0.8        | 0.5        | 0.5        |
| ANXA2        | 63019      | 60591      | 60489      | 52372      | 51958      | 52157      | 38283      | 37193      | 37842      | 36301      | 35362      | 1.0        | 0.9        | 0.6        | 0.6        |
| DIO3         | 289        | 280        | 276        | 203        | 200        | 176        | 51         | 38         | 72         | 60         | 46         | 1.0        | 0.7        | 0.2        | 0.2        |
| SLC12A4      | 577        | 590        | 570        | 363        | 383        | 386        | 45         | 25         | 52         | 54         | 42         | 1.0        | 0.7        | 0.1        | 0.1        |
| PLA2G4C      | 310        | 301        | 286        | 223        | 242        | 228        | 90         | 105        | 136        | 110        | 105        | 1.0        | 0.8        | 0.4        | 0.4        |
| CHGA         | 78         | 56         | 64         | 36         | 41         | 43         | 2          | 4          | 6          | 4          | 6          | 1.0        | 0.6        | 0.1        | 0.1        |
| MET          | 2047       | 1914       | 1985       | 1577       | 1769       | 1694       | 956        | 1004       | 1060       | 999        | 977        | 1.0        | 0.8        | 0.5        | 0.5        |
| STX3         | 1823       | 1707       | 1749       | 1443       | 1449       | 1461       | 1586       | 1634       | 1659       | 1380       | 1409       | 1.0        | 0.8        | 0.9        | 0.8        |
| TMEM45B      | 1339       | 1157       | 1257       | 834        | 867        | 927        | 1150       | 1055       | 1151       | 802        | 871        | 1.0        | 0.7        | 0.9        | 0.7        |
| FAM63B       | 627        | 535        | 651        | 388        | 465        | 409        | 535        | 502        | 504        | 395        | 402        | 1.0        | 0.7        | 0.8        | 0.7        |
| BMPR2        | 4438       | 4527       | 4363       | 3642       | 3799       | 3561       | 4082       | 3878       | 4164       | 3687       | 3734       | 1.0        | 0.8        | 0.9        | 0.8        |
| SNX9         | 1595       | 1558       | 1501       | 1224       | 1312       | 1237       | 1325       | 1282       | 1445       | 1241       | 1251       | 1.0        | 0.8        | 0.9        | 0.8        |
| FEZ2         | 1678       | 1627       | 1562       | 1344       | 1424       | 1366       | 1449       | 1535       | 1493       | 1250       | 1430       | 1.0        | 0.8        | 0.9        | 0.8        |
| SNIP1        | 728        | 612        | 667        | 536        | 552        | 554        | 583        | 591        | 678        | 537        | 642        | 1.0        | 0.8        | 0.9        | 0.9        |
| CAMK1        | 149        | 113        | 120        | 94         | 83         | 96         | 102        | 112        | 138        | 75         | 102        | 1.0        | 0.7        | 0.9        | 0.7        |
| SP6          | 167        | 159        | 119        | 111        | 97         | 115        | 128        | 110        | 136        | 93         | 99         | 1.0        | 0.7        | 0.8        | 0.6        |
| PLEKHO2      | 345        | 387        | 317        | 278        | 240        | 247        | 303        | 290        | 306        | 229        | 267        | 1.0        | 0.7        | 0.9        | 0.7        |
| GRB7         | 328        | 408        | 325        | 237        | 248        | 230        | 267        | 247        | 305        | 186        | 254        | 1.0        | 0.7        | 0.8        | 0.6        |
| LNX1         | 504        | 633        | 493        | 452        | 393        | 457        | 469        | 450        | 508        | 372        | 444        | 1.0        | 0.8        | 0.9        | 0.8        |
| IRAK2        | 46         | 63         | 56         | 36         | 36         | 28         | 37         | 24         | 44         | 13         | 29         | 1.0        | 0.6        | 0.6        | 0.4        |
| TAOK3        | 1416       | 1250       | 1292       | 1159       | 1067       | 1071       | 1106       | 1038       | 1147       | 899        | 1028       | 1.0        | 0.8        | 0.8        | 0.7        |
| <b>SMPD1</b> | <b>594</b> | <b>639</b> | <b>558</b> | <b>538</b> | <b>457</b> | <b>516</b> | <b>455</b> | <b>491</b> | <b>510</b> | <b>372</b> | <b>442</b> | <b>1.0</b> | <b>0.8</b> | <b>0.8</b> | <b>0.7</b> |
| <b>BIK</b>   | <b>344</b> | <b>391</b> | <b>367</b> | <b>302</b> | <b>251</b> | <b>301</b> | <b>277</b> | <b>255</b> | <b>291</b> | <b>194</b> | <b>258</b> | <b>1.0</b> | <b>0.8</b> | <b>0.7</b> | <b>0.6</b> |
| TNNT1        | 815        | 761        | 670        | 650        | 650        | 592        | 591        | 612        | 630        | 720        | 707        | 1.0        | 0.8        | 0.8        | 1.0        |
| GBP3         | 182        | 215        | 154        | 144        | 140        | 109        | 141        | 147        | 151        | 169        | 146        | 1.0        | 0.7        | 0.8        | 0.9        |
| TNS4         | 196        | 196        | 226        | 127        | 159        | 143        | 151        | 119        | 146        | 172        | 176        | 1.0        | 0.7        | 0.7        | 0.8        |
| MIR29B1      | 80         | 46         | 78         | 32         | 43         | 23         | 31         | 25         | 30         | 38         | 21         | 1.0        | 0.5        | 0.4        | 0.4        |
| NGEF         | 353        | 321        | 376        | 235        | 296        | 227        | 271        | 241        | 249        | 235        | 239        | 1.0        | 0.7        | 0.7        | 0.7        |
| RNF213       | 5387       | 5207       | 5385       | 4350       | 4748       | 4059       | 4309       | 4238       | 4922       | 4141       | 4635       | 1.0        | 0.8        | 0.8        | 0.8        |
| AHNAK        | 46111      | 47992      | 48154      | 37046      | 42048      | 37807      | 38472      | 38588      | 43390      | 37877      | 42408      | 1.0        | 0.8        | 0.8        | 0.8        |
| FGD6         | 1050       | 1013       | 1050       | 747        | 830        | 816        | 792        | 773        | 857        | 710        | 809        | 1.0        | 0.8        | 0.8        | 0.7        |
| CDYL         | 1643       | 1731       | 1708       | 1363       | 1442       | 1415       | 1443       | 1455       | 1543       | 1432       | 1492       | 1.0        | 0.8        | 0.9        | 0.9        |

















n
